# Supplementary material for: A more objective PD diagnostic model: integrating texture feature markers of cerebellar gray matter and white matter through machine learning
Source: PubMed Central journal article supplement (PMC11190310; doi:10.3389/fnagi.2024.1393841), 2024-06-07
Supplement: Data_Sheet_2.pdf [file Data_Sheet_2.pdf]

**Train\_results**

|                            | AUC    | 95% CIs         | Std    | AUC-PR | Cutoff | MCC    | Acc    | Youden Index | Sen    | Spe    | PPV    | NPV    |
|----------------------------|--------|-----------------|--------|--------|--------|--------|--------|--------------|--------|--------|--------|--------|
| Zscore_PCC_ANOVA_1_SVM     | 0.7567 | [0.7239-0.7894] | 0.0167 | 0.7434 | 0.5477 | 0.4123 | 0.7034 | 1.1618       | 0.6225 | 0.7843 | 0.7427 | 0.6751 |
| Zscore_PCC_ANOVA_1_LDA     | 0.7546 | [0.7217-0.7875] | 0.0168 | 0.7354 | 0.5653 | 0.4149 | 0.7022 | 1.223        | 0.5907 | 0.8137 | 0.7603 | 0.6653 |
| Zscore_PCC_ANOVA_1_AE      | 0.74   | [0.7059-0.7742] | 0.0174 | 0.7297 | 0.5267 | 0.4092 | 0.7034 | 1.1078       | 0.6495 | 0.7574 | 0.728  | 0.6836 |
| Zscore_PCC_ANOVA_1_RF      | 1      | [nan-nan]       | 0      | 1      | 0.585  | 1      | 1      | 1            | 1      | 1      | 1      | 1      |
| Zscore_PCC_ANOVA_1_LR      | 0.7568 | [0.7240-0.7896] | 0.0167 | 0.7436 | 0.5656 | 0.4189 | 0.7047 | 1.2132       | 0.598  | 0.8113 | 0.7601 | 0.6687 |
| Zscore_PCC_ANOVA_1_LRLasso | 0.7565 | [0.7237-0.7893] | 0.0167 | 0.7429 | 0.569  | 0.4144 | 0.7022 | 1.2181       | 0.5931 | 0.8113 | 0.7586 | 0.666  |
| Zscore_PCC_ANOVA_1_AB      | 0.9219 | [0.9050-0.9387] | 0.0086 | 0.927  | 0.4984 | 0.6653 | 0.8321 | 0.9436       | 0.8603 | 0.8039 | 0.8144 | 0.8519 |
| Zscore_PCC_ANOVA_1_DT      | 1      | [nan-nan]       | 0      | 1      | 1      | 1      | 1      | 1            | 1      | 1      | 1      | 1      |
| Zscore_PCC_ANOVA_1_GP      | 0.7632 | [0.7310-0.7953] | 0.0164 | 0.7694 | 0.5836 | 0.4253 | 0.7059 | 1.25         | 0.5809 | 0.8309 | 0.7745 | 0.6647 |
| Zscore_PCC_ANOVA_1_NB      | 0.7434 | [0.7100-0.7768] | 0.017  | 0.7313 | 0.6054 | 0.3742 | 0.6863 | 1.0931       | 0.6397 | 0.7328 | 0.7054 | 0.6704 |
| Zscore_PCC_ANOVA_2_SVM     | 0.817  | [0.7885-0.8455] | 0.0145 | 0.8224 | 0.5685 | 0.5081 | 0.7525 | 1.1127       | 0.6961 | 0.8088 | 0.7845 | 0.7269 |
| Zscore_PCC_ANOVA_2_LDA     | 0.8077 | [0.7784-0.8369] | 0.0149 | 0.805  | 0.5665 | 0.4833 | 0.7414 | 1.0417       | 0.7206 | 0.7623 | 0.7519 | 0.7318 |
| Zscore_PCC_ANOVA_2_AE      | 0.7986 | [0.7685-0.8288] | 0.0154 | 0.7828 | 0.4707 | 0.473  | 0.7365 | 1.0025       | 0.7353 | 0.7377 | 0.7371 | 0.7359 |
| Zscore_PCC_ANOVA_2_RF      | 1      | [nan-nan]       | 0      | 1      | 0.59   | 1      | 1      | 1            | 1      | 1      | 1      | 1      |
| Zscore_PCC_ANOVA_2_LR      | 0.8175 | [0.7891-0.8459] | 0.0145 | 0.8265 | 0.5711 | 0.5024 | 0.75   | 1.098        | 0.701  | 0.799  | 0.7772 | 0.7277 |
| Zscore_PCC_ANOVA_2_LRLasso | 0.8172 | [0.7888-0.8456] | 0.0145 | 0.8254 | 0.5705 | 0.5041 | 0.7512 | 1.0809       | 0.7108 | 0.7917 | 0.7733 | 0.7324 |
| Zscore_PCC_ANOVA_2_AB      | 0.9722 | [0.9637-0.9807] | 0.0043 | 0.9729 | 0.4992 | 0.8096 | 0.9044 | 0.9559       | 0.9265 | 0.8824 | 0.8873 | 0.9231 |
| Zscore_PCC_ANOVA_2_DT      | 1      | [nan-nan]       | 0      | 1      | 1      | 1      | 1      | 1            | 1      | 1      | 1      | 1      |
| Zscore_PCC_ANOVA_2_GP      | 0.8306 | [0.8030-0.8582] | 0.0141 | 0.8318 | 0.5366 | 0.5159 | 0.7574 | 1.0686       | 0.723  | 0.7917 | 0.7763 | 0.7408 |
| Zscore_PCC_ANOVA_2_NB      | 0.7816 | [0.7501-0.8130] | 0.016  | 0.7617 | 0.7491 | 0.4835 | 0.7377 | 1.1814       | 0.6471 | 0.8284 | 0.7904 | 0.7012 |
| Zscore_PCC_ANOVA_3_SVM     | 0.8273 | [0.7998-0.8549] | 0.0141 | 0.8336 | 0.5803 | 0.5117 | 0.7537 | 1.1299       | 0.6887 | 0.8186 | 0.7915 | 0.7245 |
| Zscore_PCC_ANOVA_3_LDA     | 0.8089 | [0.7798-0.8380] | 0.0148 | 0.8102 | 0.5675 | 0.4936 | 0.7463 | 1.0613       | 0.7157 | 0.777  | 0.7624 | 0.7321 |
| Zscore_PCC_ANOVA_3_AE      | 0.7737 | [0.7419-0.8054] | 0.0162 | 0.7528 | 0.4873 | 0.432  | 0.7145 | 0.8799       | 0.7745 | 0.6544 | 0.6915 | 0.7437 |
| Zscore_PCC_ANOVA_3_RF      | 1      | [nan-nan]       | 0      | 1      | 0.58   | 1      | 1      | 1            | 1      | 1      | 1      | 1      |
| Zscore_PCC_ANOVA_3_LR      | 0.8279 | [0.8004-0.8553] | 0.014  | 0.8359 | 0.5703 | 0.5027 | 0.75   | 1.1029       | 0.6985 | 0.8015 | 0.7787 | 0.7267 |
| Zscore_PCC_ANOVA_3_LRLasso | 0.8276 | [0.8001-0.8551] | 0.014  | 0.8357 | 0.5439 | 0.5051 | 0.7525 | 1.0245       | 0.7402 | 0.7647 | 0.7588 | 0.7464 |
| Zscore_PCC_ANOVA_3_AB      | 0.9881 | [0.9833-0.9928] | 0.0024 | 0.9887 | 0.5004 | 0.8898 | 0.9449 | 1.0123       | 0.9387 | 0.951  | 0.9504 | 0.9395 |
| Zscore_PCC_ANOVA_3_DT      | 1      | [nan-nan]       | 0      | 1      | 1      | 1      | 1      | 1            | 1      | 1      | 1      | 1      |
| Zscore_PCC_ANOVA_3_GP      | 0.8509 | [0.8250-0.8767] | 0.0132 | 0.8517 | 0.5095 | 0.5539 | 0.777  | 1            | 0.777  | 0.777  | 0.777  | 0.777  |
| Zscore_PCC_ANOVA_3_NB      | 0.789  | [0.7584-0.8197] | 0.0156 | 0.7825 | 0.7841 | 0.467  | 0.7328 | 1.0735       | 0.6961 | 0.7696 | 0.7513 | 0.7169 |
| Zscore_PCC_ANOVA_4_SVM     | 0.8487 | [0.8230-0.8744] | 0.0131 | 0.846  | 0.5347 | 0.5393 | 0.7696 | 1.0196       | 0.7598 | 0.7794 | 0.775  | 0.7644 |
| Zscore_PCC_ANOVA_4_LDA     | 0.8324 | [0.8052-0.8595] | 0.0138 | 0.8241 | 0.5635 | 0.5221 | 0.761  | 1.0123       | 0.7549 | 0.7672 | 0.7643 | 0.7579 |
| Zscore_PCC_ANOVA_4_AE      | 0.7379 | [0.7045-0.7712] | 0.017  | 0.7466 | 0.4743 | 0.3476 | 0.6703 | 1.1985       | 0.5711 | 0.7696 | 0.7125 | 0.6421 |
| Zscore_PCC_ANOVA_4_RF      | 1      | [nan-nan]       | 0      | 1      | 0.635  | 1      | 1      | 1            | 1      | 1      | 1      | 1      |
| Zscore_PCC_ANOVA_4_LR      | 0.8474 | [0.8216-0.8733] | 0.0132 | 0.8436 | 0.5299 | 0.5419 | 0.7708 | 1.027        | 0.7574 | 0.7843 | 0.7783 | 0.7637 |
| Zscore_PCC_ANOVA_4_LRLasso | 0.8468 | [0.8209-0.8727] | 0.0132 | 0.8433 | 0.5242 | 0.527  | 0.7635 | 0.9975       | 0.7647 | 0.7623 | 0.7628 | 0.7641 |
| Zscore_PCC_ANOVA_4_AB      | 0.9958 | [0.9935-0.9982] | 0.0012 | 0.9962 | 0.503  | 0.9353 | 0.9669 | 1.0564       | 0.9387 | 0.9951 | 0.9948 | 0.942  |
| Zscore_PCC_ANOVA_4_DT      | 1      | [nan-nan]       | 0      | 1      | 1      | 1      | 1      | 1            | 1      | 1      | 1      | 1      |
| Zscore_PCC_ANOVA_4_GP      | 0.8714 | [0.8475-0.8954] | 0.0122 | 0.865  | 0.4822 | 0.6056 | 0.8015 | 0.9069       | 0.848  | 0.7549 | 0.7758 | 0.8324 |
| Zscore_PCC_ANOVA_4_NB      | 0.7904 | [0.7598-0.8209] | 0.0156 | 0.7784 | 0.8382 | 0.4559 | 0.7279 | 1.0098       | 0.723  | 0.7328 | 0.7302 | 0.7257 |
| Zscore_PCC_ANOVA_5_SVM     | 0.8654 | [0.8414-0.8895] | 0.0123 | 0.8645 | 0.4458 | 0.5737 | 0.7855 | 0.9044       | 0.8333 | 0.7377 | 0.7606 | 0.8157 |
| Zscore_PCC_ANOVA_5_LDA     | 0.8544 | [0.8293-0.8795] | 0.0128 | 0.8509 | 0.5371 | 0.5469 | 0.7733 | 1.0368       | 0.7549 | 0.7917 | 0.7837 | 0.7636 |
| Zscore_PCC_ANOVA_5_AE      | 0.8045 | [0.7749-0.8340] | 0.0151 | 0.8142 | 0.4895 | 0.4942 | 0.7451 | 1.1275       | 0.6814 | 0.8088 | 0.7809 | 0.7174 |
| Zscore_PCC_ANOVA_5_RF      | 1      | [nan-nan]       | 0      | 1      | 0.61   | 1      | 1      | 1            | 1      | 1      | 1      | 1      |
| Zscore_PCC_ANOVA_5_LR      | 0.8652 | [0.8412-0.8892] | 0.0122 | 0.8643 | 0.5109 | 0.5638 | 0.7819 | 1.0196       | 0.7721 | 0.7917 | 0.7875 | 0.7764 |
| Zscore_PCC_ANOVA_5_LRLasso | 0.8646 | [0.8405-0.8886] | 0.0123 | 0.8635 | 0.5212 | 0.5614 | 0.7806 | 1.0172       | 0.7721 | 0.7892 | 0.7855 | 0.7759 |
| Zscore_PCC_ANOVA_5_AB      | 0.998  | [0.9965-0.9994] | 0.0007 | 0.998  | 0.5017 | 0.9563 | 0.9779 | 1.0294       | 0.9632 | 0.9926 | 0.9924 | 0.9643 |
| Zscore_PCC_ANOVA_5_DT      | 1      | [nan-nan]       | 0      | 1      | 1      | 1      | 1      | 1            | 1      | 1      | 1      | 1      |
| Zscore_PCC_ANOVA_5_GP      | 0.89   | [0.8681-0.9120] | 0.0112 | 0.8839 | 0.5106 | 0.6398 | 0.8199 | 0.9877       | 0.826  | 0.8137 | 0.816  | 0.8238 |
| Zscore_PCC_ANOVA_5_NB      | 0.7942 | [0.7640-0.8244] | 0.0154 | 0.7912 | 0.9111 | 0.4832 | 0.7402 | 1.1078       | 0.6863 | 0.7941 | 0.7692 | 0.7168 |
| Zscore_PCC_ANOVA_6_SVM     | 0.8711 | [0.8474-0.8948] | 0.0121 | 0.8645 | 0.5268 | 0.5964 | 0.7978 | 1.0515       | 0.7721 | 0.8235 | 0.814  | 0.7832 |
| Zscore_PCC_ANOVA_6_LDA     | 0.8714 | [0.8478-0.8950] | 0.012  | 0.8658 | 0.5414 | 0.6001 | 0.799  | 1.0833       | 0.7574 | 0.8407 | 0.8262 | 0.776  |
| Zscore_PCC_ANOVA_6_AE      | 0.7877 | [0.7570-0.8184] | 0.0157 | 0.8056 | 0.4938 | 0.4623 | 0.7279 | 1.1667       | 0.6446 | 0.8113 | 0.7735 | 0.6954 |
| Zscore_PCC_ANOVA_6_RF      | 1      | [nan-nan]       | 0      | 1      | 0.645  | 1      | 1      | 1            | 1      | 1      | 1      | 1      |
| Zscore_PCC_ANOVA_6_LR      | 0.8713 | [0.8477-0.8948] | 0.012  | 0.865  | 0.4849 | 0.5882 | 0.7941 | 0.9951       | 0.7966 | 0.7917 | 0.7927 | 0.7956 |
| Zscore_PCC_ANOVA_6_LRLasso | 0.8709 | [0.8474-0.8945] | 0.012  | 0.8653 | 0.5313 | 0.5886 | 0.7941 | 1.0343       | 0.777  | 0.8113 | 0.8046 | 0.7844 |
| Zscore_PCC_ANOVA_6_AB      | 0.9995 | [0.9990-0.9999] | 0.0002 | 0.9995 | 0.4992 | 0.9755 | 0.9877 | 0.9902       | 0.9926 | 0.9828 | 0.983  | 0.9926 |
| Zscore_PCC_ANOVA_6_DT      | 1      | [nan-nan]       | 0      | 1      | 1      | 1      | 1      | 1            | 1      | 1      | 1      | 1      |
| Zscore_PCC_ANOVA_6_GP      | 0.8972 | [0.8758-0.9185] | 0.0109 | 0.887  | 0.45   | 0.6706 | 0.8309 | 0.8382       | 0.9118 | 0.75   | 0.7848 | 0.8947 |
| Zscore_PCC_ANOVA_6_NB      | 0.8008 | [0.7710-0.8306] | 0.0152 | 0.7902 | 0.9126 | 0.4706 | 0.7353 | 1.0147       | 0.7279 | 0.7426 | 0.7388 | 0.7319 |
| Zscore_PCC_ANOVA_7_SVM     | 0.8748 | [0.8514-0.8981] | 0.0119 | 0.8675 | 0.5265 | 0.6059 | 0.8027 | 1.0417       | 0.7819 | 0.8235 | 0.8159 | 0.7906 |
| Zscore_PCC_ANOVA_7_LDA     | 0.8758 | [0.8526-0.8989] | 0.0118 | 0.8692 | 0.5153 | 0.6114 | 0.8051 | 1.0613       | 0.7745 | 0.8358 | 0.8251 | 0.7875 |
| Zscore_PCC_ANOVA_7_AE      | 0.7489 | [0.7157-0.7821] | 0.0169 | 0.7296 | 0.5372 | 0.3984 | 0.69   | 0.6985       | 0.8407 | 0.5392 | 0.646  | 0.7719 |
| Zscore_PCC_ANOVA_7_RF      | 1      | [nan-nan]       | 0      | 1      | 0.63   | 1      | 1      | 1            | 1      | 1      | 1      | 1      |
| Zscore_PCC_ANOVA_7_LR      | 0.8752 | [0.8521-0.8983] | 0.0118 | 0.8695 | 0.4178 | 0.6022 | 0.799  | 0.8824       | 0.8578 | 0.7402 | 0.7675 | 0.8389 |
| Zscore_PCC_ANOVA_7_LRLasso | 0.8749 | [0.8518-0.8980] | 0.0118 | 0.8692 | 0.4847 | 0.5909 | 0.7953 | 0.973        | 0.8088 | 0.7819 | 0.7876 | 0.8035 |
| Zscore_PCC_ANOVA_7_AB      | 0.9996 | [0.9992-1.0000] | 0.0002 | 0.9996 | 0.5008 | 0.9755 | 0.9877 | 1            | 0.9877 | 0.9877 | 0.9877 | 0.9877 |
| Zscore_PCC_ANOVA_7_DT      | 1      | [nan-nan]       | 0      | 1      | 1      | 1      | 1      | 1            | 1      | 1      | 1      | 1      |
| Zscore_PCC_ANOVA_7_GP      | 0.9109 | [0.8911-0.9308] | 0.0101 | 0.9031 | 0.4963 | 0.7142 | 0.8566 | 0.9485       | 0.8824 | 0.8309 | 0.8392 | 0.876  |
| Zscore_PCC_ANOVA_7_NB      | 0.8048 | [0.7751-0.8345] | 0.0151 | 0.7908 | 0.8918 | 0.498  | 0.7488 | 0.9583       | 0.7696 | 0.7279 | 0.7388 | 0.7596 |
| Zscore_PCC_ANOVA_8_SVM     | 0.8788 | [0.8560-0.9016] | 0.0116 | 0.8742 | 0.5215 | 0.6235 | 0.8113 | 1.0539       | 0.7843 | 0.8382 | 0.829  | 0.7953 |

|                             |                        |        |        |        |        |        |        |        |        |        |        |
|-----------------------------|------------------------|--------|--------|--------|--------|--------|--------|--------|--------|--------|--------|
| Zscore_PCC_ANOVA_8_LDA      | 0.8794 [0.8567-0.9021] | 0.0116 | 0.8739 | 0.5152 | 0.6211 | 0.81   | 1.0564 | 0.7819 | 0.8382 | 0.8286 | 0.7935 |
| Zscore_PCC_ANOVA_8_AE       | 0.7242 [0.6894-0.7590] | 0.0177 | 0.6878 | 0.5064 | 0.3851 | 0.6924 | 0.9632 | 0.7108 | 0.674  | 0.6856 | 0.6997 |
| Zscore_PCC_ANOVA_8_RF       | 1 [nan-nan]            | 0      | 1      | 0.62   | 1      | 1      | 1      | 1      | 1      | 1      | 1      |
| Zscore_PCC_ANOVA_8_LR       | 0.8798 [0.8573-0.9023] | 0.0115 | 0.8751 | 0.5155 | 0.6062 | 0.8027 | 1.0515 | 0.777  | 0.8284 | 0.8191 | 0.7879 |
| Zscore_PCC_ANOVA_8_LRLasso  | 0.8782 [0.8555-0.9009] | 0.0116 | 0.8734 | 0.5335 | 0.6065 | 0.8027 | 1.0613 | 0.7721 | 0.8333 | 0.8225 | 0.7852 |
| Zscore_PCC_ANOVA_8_AB       | 0.9998 [0.9996-1.0000] | 0.0001 | 0.9998 | 0.5009 | 0.9878 | 0.9939 | 1.0074 | 0.9902 | 0.9975 | 0.9975 | 0.9903 |
| Zscore_PCC_ANOVA_8_DT       | 1 [nan-nan]            | 0      | 1      | 1      | 1      | 1      | 1      | 1      | 1      | 1      | 1      |
| Zscore_PCC_ANOVA_8_GP       | 0.9257 [0.9080-0.9435] | 0.009  | 0.9224 | 0.4662 | 0.751  | 0.8738 | 0.9044 | 0.9216 | 0.826  | 0.8412 | 0.9133 |
| Zscore_PCC_ANOVA_8_NB       | 0.8074 [0.7782-0.8367] | 0.0149 | 0.8107 | 0.9502 | 0.4945 | 0.7463 | 1.0858 | 0.7034 | 0.7892 | 0.7694 | 0.7269 |
| Zscore_PCC_ANOVA_9_SVM      | 0.8808 [0.8581-0.9035] | 0.0116 | 0.8743 | 0.5261 | 0.6331 | 0.8162 | 1.049  | 0.7917 | 0.8407 | 0.8325 | 0.8014 |
| Zscore_PCC_ANOVA_9_LDA      | 0.8821 [0.8597-0.9045] | 0.0114 | 0.876  | 0.516  | 0.6311 | 0.815  | 1.0613 | 0.7843 | 0.8456 | 0.8355 | 0.7968 |
| Zscore_PCC_ANOVA_9_AE       | 0.8063 [0.7766-0.8360] | 0.0152 | 0.8019 | 0.4904 | 0.4986 | 0.7488 | 0.9338 | 0.7819 | 0.7157 | 0.7333 | 0.7664 |
| Zscore_PCC_ANOVA_9_RF       | 1 [nan-nan]            | 0      | 1      | 0.655  | 1      | 1      | 1      | 1      | 1      | 1      | 1      |
| Zscore_PCC_ANOVA_9_LR       | 0.8812 [0.8587-0.9036] | 0.0114 | 0.8753 | 0.4316 | 0.6144 | 0.8064 | 0.9265 | 0.8431 | 0.7696 | 0.7854 | 0.8307 |
| Zscore_PCC_ANOVA_9_LRLasso  | 0.8798 [0.8573-0.9024] | 0.0115 | 0.8747 | 0.5335 | 0.6038 | 0.8015 | 1.0539 | 0.7745 | 0.8284 | 0.8187 | 0.786  |
| Zscore_PCC_ANOVA_9_AB       | 1 [0.9999-1.0000]      | 0      | 1      | 0.4998 | 0.9951 | 0.9975 | 1      | 0.9975 | 0.9975 | 0.9975 | 0.9975 |
| Zscore_PCC_ANOVA_9_DT       | 1 [nan-nan]            | 0      | 1      | 1      | 1      | 1      | 1      | 1      | 1      | 1      | 1      |
| Zscore_PCC_ANOVA_9_GP       | 0.9363 [0.9201-0.9524] | 0.0082 | 0.9342 | 0.4724 | 0.7756 | 0.886  | 0.9044 | 0.9338 | 0.8382 | 0.8523 | 0.9268 |
| Zscore_PCC_ANOVA_9_NB       | 0.8074 [0.7781-0.8368] | 0.015  | 0.8086 | 0.935  | 0.4976 | 0.7488 | 0.9828 | 0.7574 | 0.7402 | 0.7446 | 0.7531 |
| Zscore_PCC_ANOVA_10_SVM     | 0.8823 [0.8598-0.9048] | 0.0115 | 0.8761 | 0.523  | 0.6304 | 0.815  | 1.0417 | 0.7941 | 0.8358 | 0.8286 | 0.8024 |
| Zscore_PCC_ANOVA_10_LDA     | 0.8829 [0.8606-0.9053] | 0.0114 | 0.8768 | 0.4964 | 0.6302 | 0.815  | 1.0319 | 0.799  | 0.8309 | 0.8253 | 0.8052 |
| Zscore_PCC_ANOVA_10_AE      | 0.7654 [0.7331-0.7976] | 0.0165 | 0.7391 | 0.5139 | 0.4341 | 0.7157 | 0.8873 | 0.7721 | 0.6593 | 0.6938 | 0.7431 |
| Zscore_PCC_ANOVA_10_RF      | 1 [nan-nan]            | 0      | 1      | 0.665  | 1      | 1      | 1      | 1      | 1      | 1      | 1      |
| Zscore_PCC_ANOVA_10_LR      | 0.8814 [0.8590-0.9037] | 0.0114 | 0.8762 | 0.4277 | 0.6146 | 0.8064 | 0.9216 | 0.8456 | 0.7672 | 0.7841 | 0.8324 |
| Zscore_PCC_ANOVA_10_LRLasso | 0.8801 [0.8576-0.9025] | 0.0115 | 0.875  | 0.4677 | 0.6013 | 0.8002 | 0.9485 | 0.826  | 0.7745 | 0.7855 | 0.8165 |
| Zscore_PCC_ANOVA_10_AB      | 0.9999 [0.9998-1.0000] | 0.0001 | 0.9999 | 0.5032 | 0.9902 | 0.9951 | 1.0098 | 0.9902 | 1      | 1      | 0.9903 |
| Zscore_PCC_ANOVA_10_DT      | 1 [nan-nan]            | 0      | 1      | 1      | 1      | 1      | 1      | 1      | 1      | 1      | 1      |
| Zscore_PCC_ANOVA_10_GP      | 0.9443 [0.9293-0.9593] | 0.0077 | 0.9411 | 0.4593 | 0.7862 | 0.8909 | 0.8946 | 0.9436 | 0.8382 | 0.8537 | 0.937  |
| Zscore_PCC_ANOVA_10_NB      | 0.8075 [0.7781-0.8369] | 0.015  | 0.8096 | 0.9557 | 0.5074 | 0.7537 | 1.0025 | 0.7525 | 0.7549 | 0.7543 | 0.7531 |
| Zscore_PCC_ANOVA_11_SVM     | 0.8834 [0.8610-0.9058] | 0.0114 | 0.8769 | 0.5274 | 0.6328 | 0.8162 | 1.0392 | 0.7966 | 0.8358 | 0.8291 | 0.8042 |
| Zscore_PCC_ANOVA_11_LDA     | 0.8832 [0.8609-0.9054] | 0.0114 | 0.8762 | 0.499  | 0.6303 | 0.815  | 1.0368 | 0.7966 | 0.8333 | 0.827  | 0.8038 |
| Zscore_PCC_ANOVA_11_AE      | 0.7658 [0.7338-0.7978] | 0.0163 | 0.757  | 0.5363 | 0.4395 | 0.7145 | 0.7819 | 0.8235 | 0.6054 | 0.6761 | 0.7743 |
| Zscore_PCC_ANOVA_11_RF      | 1 [nan-nan]            | 0      | 1      | 0.65   | 1      | 1      | 1      | 1      | 1      | 1      | 1      |
| Zscore_PCC_ANOVA_11_LR      | 0.8809 [0.8585-0.9033] | 0.0114 | 0.8753 | 0.4299 | 0.6071 | 0.8027 | 0.924  | 0.8407 | 0.7647 | 0.7813 | 0.8276 |
| Zscore_PCC_ANOVA_11_LRLasso | 0.8801 [0.8576-0.9026] | 0.0115 | 0.8751 | 0.4677 | 0.6013 | 0.8002 | 0.9485 | 0.826  | 0.7745 | 0.7855 | 0.8165 |
| Zscore_PCC_ANOVA_11_AB      | 1 [0.9999-1.0000]      | 0      | 1      | 0.5022 | 0.9951 | 0.9975 | 1.0049 | 0.9951 | 1      | 1      | 0.9951 |
| Zscore_PCC_ANOVA_11_DT      | 1 [nan-nan]            | 0      | 1      | 1      | 1      | 1      | 1      | 1      | 1      | 1      | 1      |
| Zscore_PCC_ANOVA_11_GP      | 0.9478 [0.9333-0.9624] | 0.0074 | 0.9444 | 0.4637 | 0.797  | 0.8958 | 0.8848 | 0.9534 | 0.8382 | 0.8549 | 0.9474 |
| Zscore_PCC_ANOVA_11_NB      | 0.8014 [0.7716-0.8313] | 0.0152 | 0.8025 | 0.9851 | 0.4973 | 0.7475 | 1.0931 | 0.701  | 0.7941 | 0.773  | 0.7265 |
| Zscore_PCC_ANOVA_12_SVM     | 0.8866 [0.8645-0.9087] | 0.0113 | 0.8813 | 0.5335 | 0.6382 | 0.8186 | 1.0539 | 0.7917 | 0.8456 | 0.8368 | 0.8023 |
| Zscore_PCC_ANOVA_12_LDA     | 0.8883 [0.8665-0.9101] | 0.0111 | 0.8834 | 0.4923 | 0.6496 | 0.8248 | 1.0172 | 0.8162 | 0.8333 | 0.8304 | 0.8193 |
| Zscore_PCC_ANOVA_12_AE      | 0.7912 [0.7607-0.8218] | 0.0156 | 0.7857 | 0.5215 | 0.4804 | 0.7377 | 0.8578 | 0.8088 | 0.6667 | 0.7082 | 0.7771 |
| Zscore_PCC_ANOVA_12_RF      | 1 [nan-nan]            | 0      | 1      | 0.64   | 1      | 1      | 1      | 1      | 1      | 1      | 1      |
| Zscore_PCC_ANOVA_12_LR      | 0.8822 [0.8600-0.9044] | 0.0113 | 0.8774 | 0.4242 | 0.6268 | 0.8125 | 0.924  | 0.8505 | 0.7745 | 0.7904 | 0.8382 |
| Zscore_PCC_ANOVA_12_LRLasso | 0.8837 [0.8615-0.9058] | 0.0113 | 0.8794 | 0.504  | 0.6103 | 0.8051 | 0.9975 | 0.8064 | 0.8039 | 0.8044 | 0.8059 |
| Zscore_PCC_ANOVA_12_AB      | 1 [nan-nan]            | 0      | 1      | 0.501  | 1      | 1      | 1      | 1      | 1      | 1      | 1      |
| Zscore_PCC_ANOVA_12_DT      | 1 [nan-nan]            | 0      | 1      | 1      | 1      | 1      | 1      | 1      | 1      | 1      | 1      |
| Zscore_PCC_ANOVA_12_GP      | 0.9543 [0.9409-0.9677] | 0.0068 | 0.9527 | 0.4678 | 0.815  | 0.9056 | 0.9044 | 0.9534 | 0.8578 | 0.8702 | 0.9485 |
| Zscore_PCC_ANOVA_12_NB      | 0.7979 [0.7676-0.8281] | 0.0154 | 0.7894 | 0.9947 | 0.4986 | 0.7475 | 1.1176 | 0.6887 | 0.8064 | 0.7806 | 0.7215 |
| Zscore_PCC_ANOVA_13_SVM     | 0.8881 [0.8662-0.9100] | 0.0112 | 0.8827 | 0.5326 | 0.6281 | 0.8137 | 1.0441 | 0.7917 | 0.8358 | 0.8282 | 0.8005 |
| Zscore_PCC_ANOVA_13_LDA     | 0.8889 [0.8672-0.9106] | 0.0111 | 0.8844 | 0.5173 | 0.6403 | 0.8199 | 1.0417 | 0.799  | 0.8407 | 0.8338 | 0.8071 |
| Zscore_PCC_ANOVA_13_AE      | 0.7935 [0.7628-0.8241] | 0.0156 | 0.7745 | 0.4993 | 0.4978 | 0.7488 | 0.9681 | 0.7647 | 0.7328 | 0.7411 | 0.757  |
| Zscore_PCC_ANOVA_13_RF      | 1 [nan-nan]            | 0      | 1      | 0.675  | 1      | 1      | 1      | 1      | 1      | 1      | 1      |
| Zscore_PCC_ANOVA_13_LR      | 0.8834 [0.8613-0.9055] | 0.0113 | 0.8787 | 0.428  | 0.6168 | 0.8076 | 0.9289 | 0.8431 | 0.7721 | 0.7872 | 0.8311 |
| Zscore_PCC_ANOVA_13_LRLasso | 0.885 [0.8631-0.9070]  | 0.0112 | 0.8808 | 0.3926 | 0.6215 | 0.8051 | 0.8113 | 0.8995 | 0.7108 | 0.7567 | 0.8761 |
| Zscore_PCC_ANOVA_13_AB      | 1 [nan-nan]            | 0      | 1      | 0.5    | 1      | 1      | 1      | 1      | 1      | 1      | 1      |
| Zscore_PCC_ANOVA_13_DT      | 1 [nan-nan]            | 0      | 1      | 1      | 1      | 1      | 1      | 1      | 1      | 1      | 1      |
| Zscore_PCC_ANOVA_13_GP      | 0.9616 [0.9494-0.9738] | 0.0062 | 0.9596 | 0.4661 | 0.8298 | 0.913  | 0.9044 | 0.9608 | 0.8652 | 0.877  | 0.9566 |
| Zscore_PCC_ANOVA_13_NB      | 0.7927 [0.7621-0.8234] | 0.0156 | 0.7843 | 0.9946 | 0.4834 | 0.7414 | 1.0466 | 0.7181 | 0.7647 | 0.7532 | 0.7307 |
| Zscore_PCC_ANOVA_14_SVM     | 0.89 [0.8682-0.9117]   | 0.0111 | 0.8826 | 0.5454 | 0.6245 | 0.8113 | 1.0784 | 0.7721 | 0.8505 | 0.8378 | 0.7886 |
| Zscore_PCC_ANOVA_14_LDA     | 0.892 [0.8707-0.9133]  | 0.0109 | 0.8876 | 0.5044 | 0.6326 | 0.8162 | 1.0294 | 0.8015 | 0.8309 | 0.8258 | 0.8071 |
| Zscore_PCC_ANOVA_14_AE      | 0.613 [0.5742-0.6518]  | 0.0198 | 0.5475 | 0.6575 | 0.2343 | 0.6115 | 0.6936 | 0.7647 | 0.4583 | 0.5854 | 0.6608 |
| Zscore_PCC_ANOVA_14_RF      | 1 [nan-nan]            | 0      | 1      | 0.66   | 1      | 1      | 1      | 1      | 1      | 1      | 1      |
| Zscore_PCC_ANOVA_14_LR      | 0.8845 [0.8626-0.9064] | 0.0112 | 0.8804 | 0.5358 | 0.6074 | 0.8027 | 1.0809 | 0.7623 | 0.8431 | 0.8293 | 0.78   |
| Zscore_PCC_ANOVA_14_LRLasso | 0.8855 [0.8636-0.9074] | 0.0112 | 0.8816 | 0.5335 | 0.6185 | 0.8088 | 1.0539 | 0.7819 | 0.8358 | 0.8264 | 0.793  |
| Zscore_PCC_ANOVA_14_AB      | 1 [nan-nan]            | 0      | 1      | 0.5001 | 1      | 1      | 1      | 1      | 1      | 1      | 1      |
| Zscore_PCC_ANOVA_14_DT      | 1 [nan-nan]            | 0      | 1      | 1      | 1      | 1      | 1      | 1      | 1      | 1      | 1      |
| Zscore_PCC_ANOVA_14_GP      | 0.9668 [0.9554-0.9783] | 0.0059 | 0.9646 | 0.479  | 0.8474 | 0.9228 | 0.9338 | 0.9559 | 0.8897 | 0.8966 | 0.9528 |
| Zscore_PCC_ANOVA_14_NB      | 0.7938 [0.7633-0.8243] | 0.0156 | 0.7896 | 0.9965 | 0.4814 | 0.7402 | 1.0637 | 0.7083 | 0.7721 | 0.7565 | 0.7258 |
| Zscore_PCC_ANOVA_15_SVM     | 0.8937 [0.8724-0.9151] | 0.0109 | 0.8844 | 0.5    | 0.6397 | 0.8199 | 0.9975 | 0.8211 | 0.8186 | 0.8191 | 0.8206 |
| Zscore_PCC_ANOVA_15_LDA     | 0.8985 [0.8780-0.9190] | 0.0105 | 0.8927 | 0.4105 | 0.6551 | 0.826  | 0.902  | 0.875  | 0.777  | 0.7969 | 0.8614 |
| Zscore_PCC_ANOVA_15_AE      | 0.7804 [0.7490-0.8117] | 0.016  | 0.7696 | 0.5182 | 0.475  | 0.7365 | 0.9093 | 0.7819 | 0.6912 | 0.7169 | 0.7601 |
| Zscore_PCC_ANOVA_15_RF      | 1 [nan-nan]            | 0      | 1      | 0.655  | 1      | 1      | 1      | 1      | 1      | 1      | 1      |

|                             |                        |        |        |        |        |        |        |        |        |        |        |
|-----------------------------|------------------------|--------|--------|--------|--------|--------|--------|--------|--------|--------|--------|
| Zscore_PCC_ANOVA_15_LR      | 0.8873 [0.8656-0.9089] | 0.011  | 0.8818 | 0.4145 | 0.6147 | 0.8051 | 0.8799 | 0.8652 | 0.7451 | 0.7724 | 0.8468 |
| Zscore_PCC_ANOVA_15_LRLasso | 0.8878 [0.8662-0.9095] | 0.011  | 0.8824 | 0.5335 | 0.6159 | 0.8076 | 1.0466 | 0.7843 | 0.8309 | 0.8226 | 0.7939 |
| Zscore_PCC_ANOVA_15_AB      | 1 [nan-nan]            | 0      | 1      | 0.5034 | 1      | 1      | 1      | 1      | 1      | 1      | 1      |
| Zscore_PCC_ANOVA_15_DT      | 1 [nan-nan]            | 0      | 1      | 1      | 1      | 1      | 1      | 1      | 1      | 1      | 1      |
| Zscore_PCC_ANOVA_15_GP      | 0.9684 [0.9571-0.9796] | 0.0057 | 0.9666 | 0.5094 | 0.8554 | 0.9277 | 0.9926 | 0.9314 | 0.924  | 0.9246 | 0.9309 |
| Zscore_PCC_ANOVA_15_NB      | 0.7881 [0.7573-0.8190] | 0.0157 | 0.785  | 0.998  | 0.4659 | 0.7328 | 1.0294 | 0.7181 | 0.7475 | 0.7399 | 0.7262 |
| Zscore_PCC_ANOVA_16_SVM     | 0.8952 [0.8740-0.9165] | 0.0109 | 0.883  | 0.4364 | 0.643  | 0.8199 | 0.8995 | 0.8701 | 0.7696 | 0.7906 | 0.8556 |
| Zscore_PCC_ANOVA_16_LDA     | 0.8993 [0.8790-0.9197] | 0.0104 | 0.8923 | 0.4342 | 0.6529 | 0.826  | 0.9461 | 0.8529 | 0.799  | 0.8093 | 0.8446 |
| Zscore_PCC_ANOVA_16_AE      | 0.7815 [0.7501-0.8129] | 0.016  | 0.7605 | 0.5031 | 0.4524 | 0.7255 | 1.0784 | 0.6863 | 0.7647 | 0.7447 | 0.7091 |
| Zscore_PCC_ANOVA_16_RF      | 1 [nan-nan]            | 0      | 1      | 0.655  | 1      | 1      | 1      | 1      | 1      | 1      | 1      |
| Zscore_PCC_ANOVA_16_LR      | 0.8886 [0.8670-0.9102] | 0.011  | 0.8808 | 0.3976 | 0.6204 | 0.8064 | 0.8431 | 0.8848 | 0.7279 | 0.7648 | 0.8634 |
| Zscore_PCC_ANOVA_16_LRLasso | 0.8891 [0.8675-0.9106] | 0.011  | 0.8821 | 0.3805 | 0.6304 | 0.8076 | 0.7819 | 0.9167 | 0.6985 | 0.7525 | 0.8934 |
| Zscore_PCC_ANOVA_16_AB      | 1 [nan-nan]            | 0      | 1      | 0.5034 | 1      | 1      | 1      | 1      | 1      | 1      | 1      |
| Zscore_PCC_ANOVA_16_DT      | 1 [nan-nan]            | 0      | 1      | 1      | 1      | 1      | 1      | 1      | 1      | 1      | 1      |
| Zscore_PCC_ANOVA_16_GP      | 0.9739 [0.9639-0.9839] | 0.0051 | 0.9718 | 0.4976 | 0.8682 | 0.9338 | 0.9657 | 0.951  | 0.9167 | 0.9194 | 0.9492 |
| Zscore_PCC_ANOVA_16_NB      | 0.7772 [0.7457-0.8088] | 0.0161 | 0.7674 | 0.9993 | 0.4296 | 0.7145 | 1.0564 | 0.6863 | 0.7426 | 0.7273 | 0.703  |
| Zscore_PCC_ANOVA_17_SVM     | 0.8957 [0.8745-0.9169] | 0.0108 | 0.8856 | 0.4901 | 0.6423 | 0.8211 | 0.9804 | 0.8309 | 0.8113 | 0.8149 | 0.8275 |
| Zscore_PCC_ANOVA_17_LDA     | 0.9009 [0.8808-0.9210] | 0.0103 | 0.8948 | 0.4496 | 0.6453 | 0.8223 | 0.9534 | 0.8456 | 0.799  | 0.808  | 0.838  |
| Zscore_PCC_ANOVA_17_AE      | 0.8082 [0.7790-0.8373] | 0.0149 | 0.8016 | 0.5611 | 0.478  | 0.739  | 0.9926 | 0.7426 | 0.7353 | 0.7372 | 0.7407 |
| Zscore_PCC_ANOVA_17_RF      | 1 [nan-nan]            | 0      | 1      | 0.66   | 1      | 1      | 1      | 1      | 1      | 1      | 1      |
| Zscore_PCC_ANOVA_17_LR      | 0.8888 [0.8673-0.9104] | 0.011  | 0.8812 | 0.468  | 0.6156 | 0.8076 | 0.9632 | 0.826  | 0.7892 | 0.7967 | 0.8193 |
| Zscore_PCC_ANOVA_17_LRLasso | 0.8898 [0.8683-0.9113] | 0.011  | 0.8829 | 0.4434 | 0.6172 | 0.8076 | 0.9191 | 0.848  | 0.7672 | 0.7846 | 0.8347 |
| Zscore_PCC_ANOVA_17_AB      | 1 [nan-nan]            | 0      | 1      | 0.503  | 1      | 1      | 1      | 1      | 1      | 1      | 1      |
| Zscore_PCC_ANOVA_17_DT      | 1 [nan-nan]            | 0      | 1      | 1      | 1      | 1      | 1      | 1      | 1      | 1      | 1      |
| Zscore_PCC_ANOVA_17_GP      | 0.9778 [0.9686-0.9870] | 0.0047 | 0.9757 | 0.518  | 0.8775 | 0.9387 | 1.0049 | 0.9363 | 0.9412 | 0.9409 | 0.9366 |
| Zscore_PCC_ANOVA_17_NB      | 0.7631 [0.7307-0.7955] | 0.0165 | 0.7462 | 0.9986 | 0.4321 | 0.7157 | 0.9412 | 0.7451 | 0.6863 | 0.7037 | 0.7292 |
| Zscore_PCC_ANOVA_18_SVM     | 0.9013 [0.8808-0.9218] | 0.0105 | 0.8922 | 0.4169 | 0.6569 | 0.8248 | 0.8505 | 0.8995 | 0.75   | 0.7825 | 0.8818 |
| Zscore_PCC_ANOVA_18_LDA     | 0.9053 [0.8858-0.9248] | 0.01   | 0.9012 | 0.4516 | 0.6527 | 0.826  | 0.951  | 0.8505 | 0.8015 | 0.8107 | 0.8428 |
| Zscore_PCC_ANOVA_18_AE      | 0.7724 [0.7405-0.8043] | 0.0163 | 0.7668 | 0.5067 | 0.4441 | 0.7218 | 0.9534 | 0.7451 | 0.6985 | 0.7119 | 0.7326 |
| Zscore_PCC_ANOVA_18_RF      | 1 [nan-nan]            | 0      | 1      | 0.66   | 1      | 1      | 1      | 1      | 1      | 1      | 1      |
| Zscore_PCC_ANOVA_18_LR      | 0.8918 [0.8706-0.9130] | 0.0108 | 0.8859 | 0.3936 | 0.6276 | 0.81   | 0.8456 | 0.8873 | 0.7328 | 0.7686 | 0.8667 |
| Zscore_PCC_ANOVA_18_LRLasso | 0.8937 [0.8727-0.9147] | 0.0107 | 0.8879 | 0.4309 | 0.6311 | 0.8137 | 0.8922 | 0.8676 | 0.7598 | 0.7832 | 0.8516 |
| Zscore_PCC_ANOVA_18_AB      | 1 [nan-nan]            | 0      | 1      | 0.5038 | 1      | 1      | 1      | 1      | 1      | 1      | 1      |
| Zscore_PCC_ANOVA_18_DT      | 1 [nan-nan]            | 0      | 1      | 1      | 1      | 1      | 1      | 1      | 1      | 1      | 1      |
| Zscore_PCC_ANOVA_18_GP      | 0.9823 [0.9742-0.9904] | 0.0041 | 0.9811 | 0.4923 | 0.8907 | 0.9449 | 0.9534 | 0.9681 | 0.9216 | 0.9251 | 0.9666 |
| Zscore_PCC_ANOVA_18_NB      | 0.7576 [0.7251-0.7902] | 0.0166 | 0.748  | 0.9997 | 0.4069 | 0.7034 | 1.0049 | 0.701  | 0.7059 | 0.7044 | 0.7024 |
| Zscore_PCC_ANOVA_19_SVM     | 0.9033 [0.8832-0.9235] | 0.0103 | 0.8952 | 0.5    | 0.652  | 0.826  | 1      | 0.826  | 0.826  | 0.826  | 0.826  |
| Zscore_PCC_ANOVA_19_LDA     | 0.9073 [0.8881-0.9264] | 0.0098 | 0.905  | 0.5048 | 0.652  | 0.826  | 1.0147 | 0.8186 | 0.8333 | 0.8308 | 0.8213 |
| Zscore_PCC_ANOVA_19_AE      | 0.7858 [0.7548-0.8167] | 0.0158 | 0.7775 | 0.4501 | 0.4615 | 0.7304 | 0.9461 | 0.7574 | 0.7034 | 0.7186 | 0.7435 |
| Zscore_PCC_ANOVA_19_RF      | 1 [nan-nan]            | 0      | 1      | 0.675  | 1      | 1      | 1      | 1      | 1      | 1      | 1      |
| Zscore_PCC_ANOVA_19_LR      | 0.8926 [0.8714-0.9138] | 0.0108 | 0.8858 | 0.4041 | 0.6407 | 0.8174 | 0.8652 | 0.8848 | 0.75   | 0.7797 | 0.8669 |
| Zscore_PCC_ANOVA_19_LRLasso | 0.8943 [0.8733-0.9153] | 0.0107 | 0.8881 | 0.4203 | 0.6407 | 0.8174 | 0.8652 | 0.8848 | 0.75   | 0.7797 | 0.8669 |
| Zscore_PCC_ANOVA_19_AB      | 1 [nan-nan]            | 0      | 1      | 0.5033 | 1      | 1      | 1      | 1      | 1      | 1      | 1      |
| Zscore_PCC_ANOVA_19_DT      | 1 [nan-nan]            | 0      | 1      | 1      | 1      | 1      | 1      | 1      | 1      | 1      | 1      |
| Zscore_PCC_ANOVA_19_GP      | 0.9847 [0.9770-0.9923] | 0.0039 | 0.9838 | 0.4976 | 0.9021 | 0.951  | 0.9804 | 0.9608 | 0.9412 | 0.9423 | 0.96   |
| Zscore_PCC_ANOVA_19_NB      | 0.7601 [0.7277-0.7926] | 0.0166 | 0.7499 | 0.9999 | 0.4056 | 0.7022 | 1.076  | 0.6642 | 0.7402 | 0.7188 | 0.6879 |
| Zscore_PCC_ANOVA_20_SVM     | 0.9031 [0.8829-0.9233] | 0.0103 | 0.8951 | 0.5154 | 0.6522 | 0.826  | 1.0245 | 0.8137 | 0.8382 | 0.8342 | 0.8182 |
| Zscore_PCC_ANOVA_20_LDA     | 0.9088 [0.8898-0.9278] | 0.0097 | 0.907  | 0.4642 | 0.662  | 0.8309 | 0.9755 | 0.8431 | 0.8186 | 0.823  | 0.8392 |
| Zscore_PCC_ANOVA_20_AE      | 0.7626 [0.7301-0.7951] | 0.0166 | 0.7247 | 0.5049 | 0.4401 | 0.7181 | 0.8676 | 0.7843 | 0.652  | 0.6926 | 0.7514 |
| Zscore_PCC_ANOVA_20_RF      | 1 [nan-nan]            | 0      | 1      | 0.65   | 1      | 1      | 1      | 1      | 1      | 1      | 1      |
| Zscore_PCC_ANOVA_20_LR      | 0.8926 [0.8714-0.9138] | 0.0108 | 0.8855 | 0.4102 | 0.6341 | 0.815  | 0.8848 | 0.8725 | 0.7574 | 0.7824 | 0.856  |
| Zscore_PCC_ANOVA_20_LRLasso | 0.8948 [0.8738-0.9157] | 0.0107 | 0.8884 | 0.445  | 0.6354 | 0.8162 | 0.902  | 0.8652 | 0.7672 | 0.7879 | 0.8505 |
| Zscore_PCC_ANOVA_20_AB      | 1 [nan-nan]            | 0      | 1      | 0.504  | 1      | 1      | 1      | 1      | 1      | 1      | 1      |
| Zscore_PCC_ANOVA_20_DT      | 1 [nan-nan]            | 0      | 1      | 1      | 1      | 1      | 1      | 1      | 1      | 1      | 1      |
| Zscore_PCC_ANOVA_20_GP      | 0.9874 [0.9805-0.9943] | 0.0035 | 0.9858 | 0.5115 | 0.9118 | 0.9559 | 1      | 0.9559 | 0.9559 | 0.9559 | 0.9559 |
| Zscore_PCC_ANOVA_20_NB      | 0.7733 [0.7415-0.8052] | 0.0162 | 0.7614 | 1      | 0.4247 | 0.712  | 1.0564 | 0.6838 | 0.7402 | 0.7247 | 0.7007 |
| Zscore_PCC_KW_1_SVM         | 0.7745 [0.7427-0.8062] | 0.0162 | 0.7486 | 0.5313 | 0.4363 | 0.7181 | 1.0147 | 0.7108 | 0.7255 | 0.7214 | 0.715  |
| Zscore_PCC_KW_1_LDA         | 0.683 [0.6469-0.7192]  | 0.0184 | 0.6609 | 0.5231 | 0.2893 | 0.6446 | 1.0294 | 0.6299 | 0.6593 | 0.649  | 0.6405 |
| Zscore_PCC_KW_1_AE          | 0.6125 [0.5731-0.6519] | 0.0201 | 0.5805 | 0.5226 | 0.314  | 0.6458 | 0.6299 | 0.8309 | 0.4608 | 0.6064 | 0.7315 |
| Zscore_PCC_KW_1_RF          | 1 [nan-nan]            | 0      | 1      | 0.555  | 1      | 1      | 1      | 1      | 1      | 1      | 1      |
| Zscore_PCC_KW_1_LR          | 0.7499 [0.7167-0.7831] | 0.0169 | 0.7192 | 0.5376 | 0.3942 | 0.6936 | 1.1863 | 0.6005 | 0.7868 | 0.738  | 0.6632 |
| Zscore_PCC_KW_1_LRLasso     | 0.7499 [0.7167-0.7830] | 0.0169 | 0.7202 | 0.5382 | 0.3779 | 0.6887 | 1.049  | 0.6642 | 0.7132 | 0.6985 | 0.6799 |
| Zscore_PCC_KW_1_AB          | 0.9432 [0.9293-0.9570] | 0.0071 | 0.9456 | 0.4995 | 0.7133 | 0.8566 | 1.0074 | 0.8529 | 0.8603 | 0.8593 | 0.854  |
| Zscore_PCC_KW_1_DT          | 1 [nan-nan]            | 0      | 1      | 1      | 1      | 1      | 1      | 1      | 1      | 1      | 1      |
| Zscore_PCC_KW_1_GP          | 0.7357 [0.7018-0.7696] | 0.0173 | 0.7145 | 0.5355 | 0.3696 | 0.6789 | 1.25   | 0.5539 | 0.8039 | 0.7386 | 0.6431 |
| Zscore_PCC_KW_1_NB          | 0.6299 [0.5918-0.6679] | 0.0194 | 0.5809 | 0.9661 | 0.2163 | 0.6078 | 0.9265 | 0.6446 | 0.5711 | 0.6005 | 0.6164 |
| Zscore_PCC_KW_2_SVM         | 0.7688 [0.7368-0.8008] | 0.0163 | 0.7629 | 0.5687 | 0.4321 | 0.7083 | 1.2647 | 0.576  | 0.8407 | 0.7833 | 0.6647 |
| Zscore_PCC_KW_2_LDA         | 0.7625 [0.7301-0.7949] | 0.0165 | 0.755  | 0.5644 | 0.4169 | 0.7022 | 1.2426 | 0.5809 | 0.8235 | 0.767  | 0.6627 |
| Zscore_PCC_KW_2_AE          | 0.6819 [0.6452-0.7186] | 0.0187 | 0.7116 | 0.49   | 0.367  | 0.6642 | 1.4461 | 0.4412 | 0.8873 | 0.7965 | 0.6136 |
| Zscore_PCC_KW_2_RF          | 1 [nan-nan]            | 0      | 1      | 0.585  | 1      | 1      | 1      | 1      | 1      | 1      | 1      |
| Zscore_PCC_KW_2_LR          | 0.7682 [0.7361-0.8002] | 0.0163 | 0.7629 | 0.5732 | 0.4315 | 0.7083 | 1.2598 | 0.5784 | 0.8382 | 0.7815 | 0.6654 |
| Zscore_PCC_KW_2_LRLasso     | 0.7673 [0.7352-0.7994] | 0.0164 | 0.762  | 0.5679 | 0.4222 | 0.7059 | 1.2206 | 0.5956 | 0.8162 | 0.7642 | 0.6687 |
| Zscore_PCC_KW_2_AB          | 0.9664 [0.9568-0.9761] | 0.0049 | 0.9694 | 0.5007 | 0.7784 | 0.8885 | 1.0613 | 0.8578 | 0.9191 | 0.9138 | 0.8661 |

|                         |                        |        |        |        |        |        |        |        |        |        |        |   |
|-------------------------|------------------------|--------|--------|--------|--------|--------|--------|--------|--------|--------|--------|---|
| Zscore_PCC_KW_2_DT      | 1 [nan-nan]            | 0      | 1      | 1      | 1      | 1      | 1      | 1      | 1      | 1      | 1      | 1 |
| Zscore_PCC_KW_2_GP      | 0.7686 [0.7367-0.8005] | 0.0163 | 0.7846 | 0.575  | 0.4368 | 0.7096 | 1.2819 | 0.5686 | 0.8505 | 0.7918 | 0.6635 |   |
| Zscore_PCC_KW_2_NB      | 0.713 [0.6778-0.7481]  | 0.018  | 0.668  | 0.9853 | 0.3701 | 0.685  | 1.0074 | 0.6814 | 0.6887 | 0.6864 | 0.6837 |   |
| Zscore_PCC_KW_3_SVM     | 0.8223 [0.7942-0.8504] | 0.0143 | 0.8262 | 0.5164 | 0.5074 | 0.7537 | 0.9828 | 0.7623 | 0.7451 | 0.7494 | 0.7581 |   |
| Zscore_PCC_KW_3_LDA     | 0.8071 [0.7776-0.8365] | 0.015  | 0.8056 | 0.5502 | 0.4853 | 0.7426 | 1.0147 | 0.7353 | 0.75   | 0.7463 | 0.7391 |   |
| Zscore_PCC_KW_3_AE      | 0.7968 [0.7664-0.8271] | 0.0155 | 0.7777 | 0.4921 | 0.4841 | 0.7414 | 0.9289 | 0.777  | 0.7059 | 0.7254 | 0.7599 |   |
| Zscore_PCC_KW_3_RF      | 1 [nan-nan]            | 0      | 1      | 0.575  | 1      | 1      | 1      | 1      | 1      | 1      | 1      |   |
| Zscore_PCC_KW_3_LR      | 0.8217 [0.7936-0.8499] | 0.0144 | 0.8258 | 0.5439 | 0.5076 | 0.7537 | 1.0319 | 0.7377 | 0.7696 | 0.762  | 0.7458 |   |
| Zscore_PCC_KW_3_LRLasso | 0.8217 [0.7936-0.8499] | 0.0144 | 0.8261 | 0.5505 | 0.5052 | 0.7525 | 1.0343 | 0.7353 | 0.7696 | 0.7614 | 0.7441 |   |
| Zscore_PCC_KW_3_AB      | 0.9901 [0.9860-0.9941] | 0.0021 | 0.9905 | 0.5008 | 0.8807 | 0.94   | 1.0417 | 0.9191 | 0.9608 | 0.9591 | 0.9224 |   |
| Zscore_PCC_KW_3_DT      | 1 [nan-nan]            | 0      | 1      | 1      | 1      | 1      | 1      | 1      | 1      | 1      | 1      |   |
| Zscore_PCC_KW_3_GP      | 0.8315 [0.8041-0.8590] | 0.014  | 0.8351 | 0.4582 | 0.5444 | 0.7696 | 0.8627 | 0.8382 | 0.701  | 0.7371 | 0.8125 |   |
| Zscore_PCC_KW_3_NB      | 0.7512 [0.7181-0.7843] | 0.0169 | 0.7236 | 0.9932 | 0.3915 | 0.6949 | 1.0956 | 0.6471 | 0.7426 | 0.7154 | 0.6779 |   |
| Zscore_PCC_KW_4_SVM     | 0.8427 [0.8165-0.8689] | 0.0134 | 0.8419 | 0.4273 | 0.5401 | 0.7659 | 0.826  | 0.8529 | 0.6789 | 0.7265 | 0.822  |   |
| Zscore_PCC_KW_4_LDA     | 0.8249 [0.7970-0.8528] | 0.0142 | 0.8218 | 0.5596 | 0.5221 | 0.761  | 1.0074 | 0.7574 | 0.7647 | 0.763  | 0.7591 |   |
| Zscore_PCC_KW_4_AE      | 0.7873 [0.7565-0.8181] | 0.0157 | 0.7703 | 0.4788 | 0.451  | 0.7255 | 1.0049 | 0.723  | 0.7279 | 0.7266 | 0.7244 |   |
| Zscore_PCC_KW_4_RF      | 1 [nan-nan]            | 0      | 1      | 0.61   | 1      | 1      | 1      | 1      | 1      | 1      | 1      |   |
| Zscore_PCC_KW_4_LR      | 0.843 [0.8169-0.8692]  | 0.0133 | 0.8443 | 0.4489 | 0.5364 | 0.7659 | 0.8701 | 0.8309 | 0.701  | 0.7354 | 0.8056 |   |
| Zscore_PCC_KW_4_LRLasso | 0.8432 [0.8170-0.8693] | 0.0133 | 0.8444 | 0.4428 | 0.541  | 0.7672 | 0.8431 | 0.8456 | 0.6887 | 0.7309 | 0.8169 |   |
| Zscore_PCC_KW_4_AB      | 0.995 [0.9925-0.9975]  | 0.0013 | 0.9952 | 0.5006 | 0.9265 | 0.9632 | 1.0098 | 0.9583 | 0.9681 | 0.9678 | 0.9587 |   |
| Zscore_PCC_KW_4_DT      | 1 [nan-nan]            | 0      | 1      | 1      | 1      | 1      | 1      | 1      | 1      | 1      | 1      |   |
| Zscore_PCC_KW_4_GP      | 0.8556 [0.8301-0.8811] | 0.013  | 0.853  | 0.4875 | 0.5889 | 0.7941 | 0.951  | 0.8186 | 0.7696 | 0.7804 | 0.8093 |   |
| Zscore_PCC_KW_4_NB      | 0.7756 [0.7440-0.8072] | 0.0161 | 0.751  | 0.995  | 0.4267 | 0.7132 | 1.0294 | 0.6985 | 0.7279 | 0.7197 | 0.7071 |   |
| Zscore_PCC_KW_5_SVM     | 0.8482 [0.8223-0.8740] | 0.0132 | 0.8421 | 0.4543 | 0.5562 | 0.7757 | 0.8701 | 0.8407 | 0.7108 | 0.744  | 0.8169 |   |
| Zscore_PCC_KW_5_LDA     | 0.8304 [0.8031-0.8578] | 0.0139 | 0.8275 | 0.5775 | 0.5251 | 0.7623 | 1.049  | 0.7377 | 0.7868 | 0.7758 | 0.75   |   |
| Zscore_PCC_KW_5_AE      | 0.6866 [0.6504-0.7227] | 0.0184 | 0.6494 | 0.4748 | 0.3124 | 0.6556 | 1.0858 | 0.6127 | 0.6985 | 0.6702 | 0.6433 |   |
| Zscore_PCC_KW_5_RF      | 1 [nan-nan]            | 0      | 1      | 0.64   | 1      | 1      | 1      | 1      | 1      | 1      | 1      |   |
| Zscore_PCC_KW_5_LR      | 0.8478 [0.8220-0.8736] | 0.0132 | 0.8459 | 0.5403 | 0.547  | 0.7733 | 1.0417 | 0.7525 | 0.7941 | 0.7852 | 0.7624 |   |
| Zscore_PCC_KW_5_LRLasso | 0.8482 [0.8225-0.8740] | 0.0132 | 0.8447 | 0.4656 | 0.5529 | 0.7745 | 0.8824 | 0.8333 | 0.7157 | 0.7456 | 0.8111 |   |
| Zscore_PCC_KW_5_AB      | 0.9981 [0.9968-0.9994] | 0.0007 | 0.9981 | 0.5012 | 0.9536 | 0.9767 | 1.0172 | 0.9681 | 0.9853 | 0.985  | 0.9687 |   |
| Zscore_PCC_KW_5_DT      | 1 [nan-nan]            | 0      | 1      | 1      | 1      | 1      | 1      | 1      | 1      | 1      | 1      |   |
| Zscore_PCC_KW_5_GP      | 0.8668 [0.8422-0.8913] | 0.0125 | 0.8604 | 0.466  | 0.619  | 0.8076 | 0.8897 | 0.8627 | 0.7525 | 0.777  | 0.8457 |   |
| Zscore_PCC_KW_5_NB      | 0.7858 [0.7548-0.8169] | 0.0158 | 0.7631 | 0.994  | 0.4575 | 0.7279 | 0.9167 | 0.7696 | 0.6863 | 0.7104 | 0.7487 |   |
| Zscore_PCC_KW_6_SVM     | 0.8608 [0.8362-0.8853] | 0.0125 | 0.8556 | 0.4417 | 0.5684 | 0.7819 | 0.8725 | 0.8456 | 0.7181 | 0.75   | 0.823  |   |
| Zscore_PCC_KW_6_LDA     | 0.8421 [0.8160-0.8682] | 0.0133 | 0.8421 | 0.5855 | 0.5256 | 0.7623 | 1.0637 | 0.7304 | 0.7941 | 0.7801 | 0.7465 |   |
| Zscore_PCC_KW_6_AE      | 0.7962 [0.7659-0.8265] | 0.0155 | 0.7828 | 0.4774 | 0.4814 | 0.7402 | 0.9363 | 0.7721 | 0.7083 | 0.7258 | 0.7565 |   |
| Zscore_PCC_KW_6_RF      | 1 [nan-nan]            | 0      | 1      | 0.63   | 1      | 1      | 1      | 1      | 1      | 1      | 1      |   |
| Zscore_PCC_KW_6_LR      | 0.8592 [0.8346-0.8838] | 0.0125 | 0.8568 | 0.4584 | 0.5627 | 0.7806 | 0.9289 | 0.8162 | 0.7451 | 0.762  | 0.8021 |   |
| Zscore_PCC_KW_6_LRLasso | 0.859 [0.8344-0.8836]  | 0.0126 | 0.8559 | 0.4745 | 0.5722 | 0.7855 | 0.9387 | 0.8162 | 0.7549 | 0.7691 | 0.8042 |   |
| Zscore_PCC_KW_6_AB      | 0.9992 [0.9984-1.0000] | 0.0004 | 0.9992 | 0.4996 | 0.9828 | 0.9914 | 1.0025 | 0.9902 | 0.9926 | 0.9926 | 0.9902 |   |
| Zscore_PCC_KW_6_DT      | 1 [nan-nan]            | 0      | 1      | 1      | 1      | 1      | 1      | 1      | 1      | 1      | 1      |   |
| Zscore_PCC_KW_6_GP      | 0.8832 [0.8606-0.9059] | 0.0116 | 0.8779 | 0.5025 | 0.64   | 0.8199 | 0.9681 | 0.8358 | 0.8039 | 0.81   | 0.8304 |   |
| Zscore_PCC_KW_6_NB      | 0.7882 [0.7572-0.8191] | 0.0158 | 0.765  | 0.9947 | 0.4682 | 0.7328 | 0.8971 | 0.7843 | 0.6814 | 0.7111 | 0.7596 |   |
| Zscore_PCC_KW_7_SVM     | 0.8611 [0.8366-0.8856] | 0.0125 | 0.8557 | 0.5071 | 0.5686 | 0.7843 | 1      | 0.7843 | 0.7843 | 0.7843 | 0.7843 |   |
| Zscore_PCC_KW_7_LDA     | 0.8526 [0.8275-0.8778] | 0.0128 | 0.85   | 0.4993 | 0.5497 | 0.7745 | 0.951  | 0.799  | 0.75   | 0.7617 | 0.7887 |   |
| Zscore_PCC_KW_7_AE      | 0.7761 [0.7442-0.8079] | 0.0162 | 0.7469 | 0.5702 | 0.4455 | 0.7218 | 0.9093 | 0.7672 | 0.6765 | 0.7034 | 0.7439 |   |
| Zscore_PCC_KW_7_RF      | 1 [nan-nan]            | 0      | 1      | 0.615  | 1      | 1      | 1      | 1      | 1      | 1      | 1      |   |
| Zscore_PCC_KW_7_LR      | 0.8608 [0.8363-0.8852] | 0.0125 | 0.8568 | 0.5356 | 0.5593 | 0.7794 | 1.0392 | 0.7598 | 0.799  | 0.7908 | 0.7689 |   |
| Zscore_PCC_KW_7_LRLasso | 0.8598 [0.8352-0.8843] | 0.0125 | 0.8561 | 0.5264 | 0.5588 | 0.7794 | 1.0049 | 0.777  | 0.7819 | 0.7808 | 0.778  |   |
| Zscore_PCC_KW_7_AB      | 0.9995 [0.9990-1.0000] | 0.0003 | 0.9995 | 0.5001 | 0.9853 | 0.9926 | 1.0098 | 0.9877 | 0.9975 | 0.9975 | 0.9879 |   |
| Zscore_PCC_KW_7_DT      | 1 [nan-nan]            | 0      | 1      | 1      | 1      | 1      | 1      | 1      | 1      | 1      | 1      |   |
| Zscore_PCC_KW_7_GP      | 0.8951 [0.8737-0.9165] | 0.0109 | 0.8935 | 0.4521 | 0.6812 | 0.837  | 0.8554 | 0.9093 | 0.7647 | 0.7944 | 0.894  |   |
| Zscore_PCC_KW_7_NB      | 0.7784 [0.7470-0.8098] | 0.016  | 0.7593 | 0.9968 | 0.4586 | 0.7279 | 0.8922 | 0.7819 | 0.674  | 0.7058 | 0.7555 |   |
| Zscore_PCC_KW_8_SVM     | 0.8664 [0.8423-0.8905] | 0.0123 | 0.8595 | 0.4471 | 0.5826 | 0.7904 | 0.924  | 0.8284 | 0.7525 | 0.7699 | 0.8143 |   |
| Zscore_PCC_KW_8_LDA     | 0.8596 [0.8352-0.8840] | 0.0125 | 0.8574 | 0.5458 | 0.5567 | 0.7782 | 1.0368 | 0.7598 | 0.7966 | 0.7888 | 0.7683 |   |
| Zscore_PCC_KW_8_AE      | 0.7373 [0.7032-0.7713] | 0.0174 | 0.7079 | 0.4981 | 0.4027 | 0.6985 | 0.8333 | 0.7819 | 0.6152 | 0.6702 | 0.7382 |   |
| Zscore_PCC_KW_8_RF      | 1 [nan-nan]            | 0      | 1      | 0.62   | 1      | 1      | 1      | 1      | 1      | 1      | 1      |   |
| Zscore_PCC_KW_8_LR      | 0.8651 [0.8412-0.8891] | 0.0122 | 0.8618 | 0.4378 | 0.5685 | 0.7831 | 0.9093 | 0.8284 | 0.7377 | 0.7596 | 0.8113 |   |
| Zscore_PCC_KW_8_LRLasso | 0.8648 [0.8407-0.8888] | 0.0123 | 0.8613 | 0.5268 | 0.5687 | 0.7843 | 1.0098 | 0.7794 | 0.7892 | 0.7871 | 0.7816 |   |
| Zscore_PCC_KW_8_AB      | 0.9994 [0.9988-1.0000] | 0.0003 | 0.9994 | 0.4997 | 0.9779 | 0.989  | 0.9975 | 0.9902 | 0.9877 | 0.9878 | 0.9902 |   |
| Zscore_PCC_KW_8_DT      | 1 [nan-nan]            | 0      | 1      | 1      | 1      | 1      | 1      | 1      | 1      | 1      | 1      |   |
| Zscore_PCC_KW_8_GP      | 0.9037 [0.8831-0.9242] | 0.0105 | 0.9008 | 0.4722 | 0.6896 | 0.8431 | 0.902  | 0.8922 | 0.7941 | 0.8125 | 0.8804 |   |
| Zscore_PCC_KW_8_NB      | 0.7894 [0.7587-0.8201] | 0.0157 | 0.7694 | 0.9989 | 0.4683 | 0.7341 | 1.0221 | 0.723  | 0.7451 | 0.7393 | 0.729  |   |
| Zscore_PCC_KW_9_SVM     | 0.874 [0.8505-0.8974]  | 0.012  | 0.8653 | 0.464  | 0.6055 | 0.8027 | 0.9828 | 0.8113 | 0.7941 | 0.7976 | 0.808  |   |
| Zscore_PCC_KW_9_LDA     | 0.8743 [0.8510-0.8976] | 0.0119 | 0.8674 | 0.5155 | 0.6086 | 0.8039 | 1.049  | 0.7794 | 0.8284 | 0.8196 | 0.7897 |   |
| Zscore_PCC_KW_9_AE      | 0.7944 [0.7638-0.8250] | 0.0156 | 0.7787 | 0.4989 | 0.4792 | 0.739  | 1.0711 | 0.7034 | 0.7745 | 0.7573 | 0.7231 |   |
| Zscore_PCC_KW_9_RF      | 1 [nan-nan]            | 0      | 1      | 0.63   | 1      | 1      | 1      | 1      | 1      | 1      | 1      |   |
| Zscore_PCC_KW_9_LR      | 0.8727 [0.8494-0.8960] | 0.0119 | 0.8668 | 0.3857 | 0.6009 | 0.7953 | 0.8162 | 0.8873 | 0.7034 | 0.7495 | 0.8619 |   |
| Zscore_PCC_KW_9_LRLasso | 0.8735 [0.8503-0.8968] | 0.0119 | 0.8683 | 0.5207 | 0.5983 | 0.799  | 1.0294 | 0.7843 | 0.8137 | 0.8081 | 0.7905 |   |
| Zscore_PCC_KW_9_AB      | 0.9998 [0.9996-1.0000] | 0.0001 | 0.9999 | 0.5002 | 0.9927 | 0.9963 | 1.0025 | 0.9951 | 0.9975 | 0.9975 | 0.9951 |   |
| Zscore_PCC_KW_9_DT      | 1 [nan-nan]            | 0      | 1      | 1      | 1      | 1      | 1      | 1      | 1      | 1      | 1      |   |
| Zscore_PCC_KW_9_GP      | 0.919 [0.9001-0.9379]  | 0.0096 | 0.9136 | 0.471  | 0.7441 | 0.8701 | 0.8971 | 0.9216 | 0.8186 | 0.8356 | 0.9126 |   |
| Zscore_PCC_KW_9_NB      | 0.7903 [0.7596-0.8210] | 0.0157 | 0.7735 | 0.9989 | 0.4681 | 0.7341 | 0.9926 | 0.7377 | 0.7304 | 0.7324 | 0.7358 |   |

|                          |                        |        |        |        |        |        |        |        |        |        |        |
|--------------------------|------------------------|--------|--------|--------|--------|--------|--------|--------|--------|--------|--------|
| Zscore_PCC_KW_10_SVM     | 0.8761 [0.8529-0.8993] | 0.0118 | 0.8681 | 0.5193 | 0.6136 | 0.8064 | 1.0539 | 0.7794 | 0.8333 | 0.8238 | 0.7907 |
| Zscore_PCC_KW_10_LDA     | 0.8765 [0.8535-0.8995] | 0.0118 | 0.8684 | 0.4797 | 0.6128 | 0.8064 | 0.9902 | 0.8113 | 0.8015 | 0.8034 | 0.8094 |
| Zscore_PCC_KW_10_AE      | 0.795 [0.7649-0.8251]  | 0.0154 | 0.8022 | 0.5002 | 0.4581 | 0.7279 | 0.902  | 0.777  | 0.6789 | 0.7076 | 0.7527 |
| Zscore_PCC_KW_10_RF      | 1 [nan-nan]            | 0      | 1      | 0.625  | 1      | 1      | 1      | 1      | 1      | 1      | 1      |
| Zscore_PCC_KW_10_LR      | 0.8738 [0.8506-0.8969] | 0.0118 | 0.8694 | 0.3916 | 0.6016 | 0.7966 | 0.8333 | 0.8799 | 0.7132 | 0.7542 | 0.8559 |
| Zscore_PCC_KW_10_LRLasso | 0.8749 [0.8519-0.8979] | 0.0117 | 0.8713 | 0.539  | 0.5947 | 0.7966 | 1.0735 | 0.7598 | 0.8333 | 0.8201 | 0.7763 |
| Zscore_PCC_KW_10_AB      | 0.9998 [0.9996-1.0000] | 0.0001 | 0.9999 | 0.4997 | 0.9902 | 0.9951 | 1      | 0.9951 | 0.9951 | 0.9951 | 0.9951 |
| Zscore_PCC_KW_10_DT      | 1 [nan-nan]            | 0      | 1      | 1      | 1      | 1      | 1      | 1      | 1      | 1      | 1      |
| Zscore_PCC_KW_10_GP      | 0.9288 [0.9113-0.9463] | 0.0089 | 0.924  | 0.4657 | 0.7575 | 0.8762 | 0.8848 | 0.9338 | 0.8186 | 0.8374 | 0.9252 |
| Zscore_PCC_KW_10_NB      | 0.7921 [0.7615-0.8228] | 0.0156 | 0.7748 | 0.999  | 0.4706 | 0.7353 | 0.9853 | 0.7426 | 0.7279 | 0.7319 | 0.7388 |
| Zscore_PCC_KW_11_SVM     | 0.8762 [0.8530-0.8994] | 0.0118 | 0.868  | 0.5214 | 0.6162 | 0.8076 | 1.0564 | 0.7794 | 0.8358 | 0.826  | 0.7912 |
| Zscore_PCC_KW_11_LDA     | 0.8782 [0.8554-0.9010] | 0.0116 | 0.8716 | 0.5286 | 0.6168 | 0.8076 | 1.0711 | 0.7721 | 0.8431 | 0.8311 | 0.7872 |
| Zscore_PCC_KW_11_AE      | 0.6005 [0.5616-0.6394] | 0.0198 | 0.5694 | 0.4924 | 0.278  | 0.6054 | 0.348  | 0.9314 | 0.2794 | 0.5638 | 0.8028 |
| Zscore_PCC_KW_11_RF      | 1 [nan-nan]            | 0      | 1      | 0.64   | 1      | 1      | 1      | 1      | 1      | 1      | 1      |
| Zscore_PCC_KW_11_LR      | 0.8732 [0.8500-0.8964] | 0.0118 | 0.8692 | 0.3941 | 0.6016 | 0.7966 | 0.8333 | 0.8799 | 0.7132 | 0.7542 | 0.8559 |
| Zscore_PCC_KW_11_LRLasso | 0.8749 [0.8518-0.8979] | 0.0118 | 0.8713 | 0.539  | 0.5947 | 0.7966 | 1.0735 | 0.7598 | 0.8333 | 0.8201 | 0.7763 |
| Zscore_PCC_KW_11_AB      | 1 [1.0000-1.0000]      | 0      | 1      | 0.5006 | 0.9976 | 0.9988 | 0.9975 | 1      | 0.9975 | 0.9976 | 1      |
| Zscore_PCC_KW_11_DT      | 1 [nan-nan]            | 0      | 1      | 1      | 1      | 1      | 1      | 1      | 1      | 1      | 1      |
| Zscore_PCC_KW_11_GP      | 0.9334 [0.9166-0.9502] | 0.0086 | 0.9294 | 0.4817 | 0.7642 | 0.8811 | 0.9289 | 0.9167 | 0.8456 | 0.8558 | 0.9103 |
| Zscore_PCC_KW_11_NB      | 0.7976 [0.7673-0.8279] | 0.0155 | 0.789  | 0.9995 | 0.4839 | 0.7414 | 0.9338 | 0.7745 | 0.7083 | 0.7264 | 0.7585 |
| Zscore_PCC_KW_12_SVM     | 0.88 [0.8573-0.9027]   | 0.0116 | 0.8724 | 0.5374 | 0.6097 | 0.8039 | 1.0784 | 0.7647 | 0.8431 | 0.8298 | 0.7818 |
| Zscore_PCC_KW_12_LDA     | 0.881 [0.8586-0.9034]  | 0.0114 | 0.8763 | 0.5483 | 0.6154 | 0.8064 | 1.0931 | 0.7598 | 0.8529 | 0.8378 | 0.7803 |
| Zscore_PCC_KW_12_AE      | 0.746 [0.7122-0.7798]  | 0.0172 | 0.7179 | 0.5071 | 0.4288 | 0.712  | 0.8505 | 0.7868 | 0.6373 | 0.6844 | 0.7493 |
| Zscore_PCC_KW_12_RF      | 1 [nan-nan]            | 0      | 1      | 0.635  | 1      | 1      | 1      | 1      | 1      | 1      | 1      |
| Zscore_PCC_KW_12_LR      | 0.8754 [0.8525-0.8983] | 0.0117 | 0.8725 | 0.4646 | 0.5884 | 0.7941 | 0.9755 | 0.8064 | 0.7819 | 0.7871 | 0.8015 |
| Zscore_PCC_KW_12_LRLasso | 0.8769 [0.8541-0.8996] | 0.0116 | 0.8742 | 0.5349 | 0.5967 | 0.7978 | 1.0613 | 0.7672 | 0.8284 | 0.8172 | 0.7806 |
| Zscore_PCC_KW_12_AB      | 1 [0.9999-1.0000]      | 0      | 1      | 0.503  | 0.9951 | 0.9975 | 1.0049 | 0.9951 | 1      | 1      | 0.9951 |
| Zscore_PCC_KW_12_DT      | 1 [nan-nan]            | 0      | 1      | 1      | 1      | 1      | 1      | 1      | 1      | 1      | 1      |
| Zscore_PCC_KW_12_GP      | 0.9431 [0.9278-0.9584] | 0.0078 | 0.9394 | 0.4777 | 0.7815 | 0.8897 | 0.9265 | 0.9265 | 0.8529 | 0.863  | 0.9206 |
| Zscore_PCC_KW_12_NB      | 0.7944 [0.7639-0.8249] | 0.0156 | 0.7839 | 0.9998 | 0.4707 | 0.7353 | 1.0196 | 0.7255 | 0.7451 | 0.74   | 0.7308 |
| Zscore_PCC_KW_13_SVM     | 0.8815 [0.8590-0.9041] | 0.0115 | 0.8748 | 0.53   | 0.6315 | 0.815  | 1.0711 | 0.7794 | 0.8505 | 0.8391 | 0.7941 |
| Zscore_PCC_KW_13_LDA     | 0.8838 [0.8617-0.9060] | 0.0113 | 0.8784 | 0.4885 | 0.6252 | 0.8125 | 1.0221 | 0.8015 | 0.8235 | 0.8195 | 0.8058 |
| Zscore_PCC_KW_13_AE      | 0.7975 [0.7669-0.8282] | 0.0157 | 0.7688 | 0.494  | 0.4958 | 0.7475 | 0.9461 | 0.7745 | 0.7206 | 0.7349 | 0.7617 |
| Zscore_PCC_KW_13_RF      | 1 [nan-nan]            | 0      | 1      | 0.635  | 1      | 1      | 1      | 1      | 1      | 1      | 1      |
| Zscore_PCC_KW_13_LR      | 0.8771 [0.8543-0.8999] | 0.0116 | 0.8724 | 0.4157 | 0.6012 | 0.799  | 0.8971 | 0.8505 | 0.7475 | 0.7711 | 0.8333 |
| Zscore_PCC_KW_13_LRLasso | 0.8791 [0.8566-0.9016] | 0.0115 | 0.8744 | 0.5333 | 0.5969 | 0.7978 | 1.0662 | 0.7647 | 0.8309 | 0.8189 | 0.7793 |
| Zscore_PCC_KW_13_AB      | 1 [nan-nan]            | 0      | 1      | 0.4993 | 1      | 1      | 1      | 1      | 1      | 1      | 1      |
| Zscore_PCC_KW_13_DT      | 1 [nan-nan]            | 0      | 1      | 1      | 1      | 1      | 1      | 1      | 1      | 1      | 1      |
| Zscore_PCC_KW_13_GP      | 0.9455 [0.9306-0.9605] | 0.0076 | 0.942  | 0.4675 | 0.7972 | 0.8971 | 0.9118 | 0.9412 | 0.8529 | 0.8649 | 0.9355 |
| Zscore_PCC_KW_13_NB      | 0.7934 [0.7629-0.8240] | 0.0156 | 0.7825 | 0.9999 | 0.4683 | 0.7341 | 1.0221 | 0.723  | 0.7451 | 0.7393 | 0.729  |
| Zscore_PCC_KW_14_SVM     | 0.8827 [0.8601-0.9052] | 0.0115 | 0.8756 | 0.5123 | 0.6331 | 0.8162 | 1.049  | 0.7917 | 0.8407 | 0.8325 | 0.8014 |
| Zscore_PCC_KW_14_LDA     | 0.8854 [0.8634-0.9074] | 0.0112 | 0.8808 | 0.451  | 0.635  | 0.8174 | 0.9779 | 0.8284 | 0.8064 | 0.8106 | 0.8246 |
| Zscore_PCC_KW_14_AE      | 0.8073 [0.7783-0.8363] | 0.0148 | 0.8109 | 0.6655 | 0.4785 | 0.7353 | 1.1814 | 0.6446 | 0.826  | 0.7874 | 0.6992 |
| Zscore_PCC_KW_14_RF      | 1 [nan-nan]            | 0      | 1      | 0.645  | 1      | 1      | 1      | 1      | 1      | 1      | 1      |
| Zscore_PCC_KW_14_LR      | 0.8779 [0.8553-0.9006] | 0.0116 | 0.8738 | 0.4291 | 0.605  | 0.8015 | 0.9167 | 0.8431 | 0.7598 | 0.7783 | 0.8289 |
| Zscore_PCC_KW_14_LRLasso | 0.8801 [0.8576-0.9025] | 0.0115 | 0.8755 | 0.529  | 0.6035 | 0.8015 | 1.0441 | 0.7794 | 0.8235 | 0.8154 | 0.7887 |
| Zscore_PCC_KW_14_AB      | 1 [1.0000-1.0000]      | 0      | 1      | 0.5013 | 0.9976 | 0.9988 | 1.0025 | 0.9975 | 1      | 1      | 0.9976 |
| Zscore_PCC_KW_14_DT      | 1 [nan-nan]            | 0      | 1      | 1      | 1      | 1      | 1      | 1      | 1      | 1      | 1      |
| Zscore_PCC_KW_14_GP      | 0.9515 [0.9374-0.9657] | 0.0072 | 0.9488 | 0.4721 | 0.8038 | 0.9007 | 0.924  | 0.9387 | 0.8627 | 0.8724 | 0.9337 |
| Zscore_PCC_KW_14_NB      | 0.792 [0.7614-0.8226]  | 0.0156 | 0.7807 | 0.9999 | 0.4583 | 0.7292 | 0.9975 | 0.7304 | 0.7279 | 0.7286 | 0.7297 |
| Zscore_PCC_KW_15_SVM     | 0.8866 [0.8645-0.9088] | 0.0113 | 0.8807 | 0.5052 | 0.6453 | 0.8223 | 1.0466 | 0.799  | 0.8456 | 0.838  | 0.808  |
| Zscore_PCC_KW_15_LDA     | 0.8883 [0.8666-0.9100] | 0.0111 | 0.8844 | 0.4679 | 0.6448 | 0.8223 | 0.9779 | 0.8333 | 0.8113 | 0.8153 | 0.8296 |
| Zscore_PCC_KW_15_AE      | 0.7773 [0.7459-0.8087] | 0.016  | 0.7697 | 0.5496 | 0.444  | 0.7218 | 0.9583 | 0.7426 | 0.701  | 0.7129 | 0.7315 |
| Zscore_PCC_KW_15_RF      | 1 [nan-nan]            | 0      | 1      | 0.645  | 1      | 1      | 1      | 1      | 1      | 1      | 1      |
| Zscore_PCC_KW_15_LR      | 0.8798 [0.8573-0.9024] | 0.0115 | 0.8751 | 0.4191 | 0.6213 | 0.8088 | 0.8922 | 0.8627 | 0.7549 | 0.7788 | 0.8462 |
| Zscore_PCC_KW_15_LRLasso | 0.8834 [0.8612-0.9055] | 0.0113 | 0.8789 | 0.5014 | 0.6128 | 0.8064 | 0.9951 | 0.8088 | 0.8039 | 0.8049 | 0.8079 |
| Zscore_PCC_KW_15_AB      | 1 [nan-nan]            | 0      | 1      | 0.5026 | 1      | 1      | 1      | 1      | 1      | 1      | 1      |
| Zscore_PCC_KW_15_DT      | 1 [nan-nan]            | 0      | 1      | 1      | 1      | 1      | 1      | 1      | 1      | 1      | 1      |
| Zscore_PCC_KW_15_GP      | 0.9569 [0.9435-0.9703] | 0.0068 | 0.9537 | 0.4724 | 0.8264 | 0.9118 | 0.9167 | 0.9534 | 0.8701 | 0.8801 | 0.9492 |
| Zscore_PCC_KW_15_NB      | 0.7958 [0.7654-0.8262] | 0.0155 | 0.7878 | 1      | 0.4731 | 0.7365 | 0.9828 | 0.7451 | 0.7279 | 0.7325 | 0.7406 |
| Zscore_PCC_KW_16_SVM     | 0.8854 [0.8632-0.9077] | 0.0114 | 0.8795 | 0.4938 | 0.6424 | 0.8211 | 1.0294 | 0.8064 | 0.8358 | 0.8308 | 0.8119 |
| Zscore_PCC_KW_16_LDA     | 0.8903 [0.8688-0.9117] | 0.0109 | 0.8862 | 0.4816 | 0.6544 | 0.8272 | 0.9975 | 0.8284 | 0.826  | 0.8264 | 0.828  |
| Zscore_PCC_KW_16_AE      | 0.7856 [0.7547-0.8165] | 0.0158 | 0.7792 | 0.4897 | 0.4657 | 0.7328 | 1      | 0.7328 | 0.7328 | 0.7328 | 0.7328 |
| Zscore_PCC_KW_16_RF      | 1 [nan-nan]            | 0      | 1      | 0.65   | 1      | 1      | 1      | 1      | 1      | 1      | 1      |
| Zscore_PCC_KW_16_LR      | 0.8815 [0.8592-0.9038] | 0.0114 | 0.8766 | 0.4294 | 0.6247 | 0.8113 | 0.9167 | 0.8529 | 0.7696 | 0.7873 | 0.8396 |
| Zscore_PCC_KW_16_LRLasso | 0.8843 [0.8623-0.9064] | 0.0113 | 0.8791 | 0.5255 | 0.6156 | 0.8076 | 1.0368 | 0.7892 | 0.826  | 0.8193 | 0.7967 |
| Zscore_PCC_KW_16_AB      | 1 [1.0000-1.0000]      | 0      | 1      | 0.5021 | 0.9976 | 0.9988 | 1.0025 | 0.9975 | 1      | 1      | 0.9976 |
| Zscore_PCC_KW_16_DT      | 1 [nan-nan]            | 0      | 1      | 1      | 1      | 1      | 1      | 1      | 1      | 1      | 1      |
| Zscore_PCC_KW_16_GP      | 0.9635 [0.9513-0.9756] | 0.0062 | 0.9604 | 0.5101 | 0.8407 | 0.9203 | 1.0025 | 0.9191 | 0.9216 | 0.9214 | 0.9193 |
| Zscore_PCC_KW_16_NB      | 0.7962 [0.7659-0.8266] | 0.0155 | 0.7942 | 1      | 0.4755 | 0.7377 | 1      | 0.7377 | 0.7377 | 0.7377 | 0.7377 |
| Zscore_PCC_KW_17_SVM     | 0.889 [0.8670-0.9110]  | 0.0112 | 0.8807 | 0.4948 | 0.6373 | 0.8186 | 1.0147 | 0.8113 | 0.826  | 0.8234 | 0.814  |
| Zscore_PCC_KW_17_LDA     | 0.8917 [0.8704-0.9129] | 0.0108 | 0.8862 | 0.4778 | 0.6373 | 0.8186 | 0.9853 | 0.826  | 0.8113 | 0.814  | 0.8234 |
| Zscore_PCC_KW_17_AE      | 0.8163 [0.7876-0.8450] | 0.0147 | 0.8091 | 0.5566 | 0.5148 | 0.7574 | 0.9804 | 0.7672 | 0.7475 | 0.7524 | 0.7625 |

|                          |                        |        |        |        |        |        |        |        |        |        |        |
|--------------------------|------------------------|--------|--------|--------|--------|--------|--------|--------|--------|--------|--------|
| Zscore_PCC_KW_17_RF      | 1 [nan-nan]            | 0      | 1      | 0.635  | 1      | 1      | 1      | 1      | 1      | 1      | 1      |
| Zscore_PCC_KW_17_LR      | 0.8836 [0.8615-0.9057] | 0.0113 | 0.8779 | 0.4136 | 0.6216 | 0.8088 | 0.8873 | 0.8652 | 0.7525 | 0.7775 | 0.8481 |
| Zscore_PCC_KW_17_LRLasso | 0.8853 [0.8633-0.9072] | 0.0112 | 0.8789 | 0.5256 | 0.6179 | 0.8088 | 1.0294 | 0.7941 | 0.8235 | 0.8182 | 0.8    |
| Zscore_PCC_KW_17_AB      | 1 [nan-nan]            | 0      | 1      | 0.5037 | 1      | 1      | 1      | 1      | 1      | 1      | 1      |
| Zscore_PCC_KW_17_DT      | 1 [nan-nan]            | 0      | 1      | 1      | 1      | 1      | 1      | 1      | 1      | 1      | 1      |
| Zscore_PCC_KW_17_GP      | 0.9697 [0.9586-0.9808] | 0.0057 | 0.9672 | 0.5091 | 0.8603 | 0.9301 | 1.0025 | 0.9289 | 0.9314 | 0.9312 | 0.9291 |
| Zscore_PCC_KW_17_NB      | 0.7939 [0.7633-0.8245] | 0.0156 | 0.7899 | 1      | 0.48   | 0.7365 | 1.1691 | 0.652  | 0.8211 | 0.7847 | 0.7023 |
| Zscore_PCC_KW_18_SVM     | 0.892 [0.8703-0.9136]  | 0.011  | 0.8845 | 0.4343 | 0.6384 | 0.8174 | 0.8946 | 0.8701 | 0.7647 | 0.7871 | 0.8548 |
| Zscore_PCC_KW_18_LDA     | 0.8969 [0.8763-0.9175] | 0.0105 | 0.8918 | 0.4236 | 0.6338 | 0.8162 | 0.9314 | 0.8505 | 0.7819 | 0.7959 | 0.8395 |
| Zscore_PCC_KW_18_AE      | 0.7607 [0.7280-0.7934] | 0.0167 | 0.7251 | 0.5049 | 0.4167 | 0.7083 | 1.0196 | 0.6985 | 0.7181 | 0.7125 | 0.7043 |
| Zscore_PCC_KW_18_RF      | 1 [nan-nan]            | 0      | 1      | 0.655  | 1      | 1      | 1      | 1      | 1      | 1      | 1      |
| Zscore_PCC_KW_18_LR      | 0.8849 [0.8629-0.9070] | 0.0113 | 0.877  | 0.4403 | 0.6245 | 0.8113 | 0.9216 | 0.8505 | 0.7721 | 0.7886 | 0.8378 |
| Zscore_PCC_KW_18_LRLasso | 0.8882 [0.8665-0.9099] | 0.0111 | 0.8806 | 0.446  | 0.6219 | 0.81   | 0.924  | 0.848  | 0.7721 | 0.7882 | 0.8355 |
| Zscore_PCC_KW_18_AB      | 1 [nan-nan]            | 0      | 1      | 0.5013 | 1      | 1      | 1      | 1      | 1      | 1      | 1      |
| Zscore_PCC_KW_18_DT      | 1 [nan-nan]            | 0      | 1      | 1      | 1      | 1      | 1      | 1      | 1      | 1      | 1      |
| Zscore_PCC_KW_18_GP      | 0.9748 [0.9648-0.9848] | 0.0051 | 0.9729 | 0.5019 | 0.8874 | 0.9436 | 0.9853 | 0.951  | 0.9363 | 0.9372 | 0.9502 |
| Zscore_PCC_KW_18_NB      | 0.7939 [0.7633-0.8245] | 0.0156 | 0.7906 | 1      | 0.4977 | 0.7439 | 1.1985 | 0.6446 | 0.8431 | 0.8043 | 0.7035 |
| Zscore_PCC_KW_19_SVM     | 0.8996 [0.8789-0.9202] | 0.0105 | 0.8921 | 0.4089 | 0.6535 | 0.8223 | 0.8358 | 0.9044 | 0.7402 | 0.7768 | 0.8856 |
| Zscore_PCC_KW_19_LDA     | 0.9012 [0.8812-0.9212] | 0.0102 | 0.8984 | 0.5022 | 0.6399 | 0.8199 | 1.027  | 0.8064 | 0.8333 | 0.8287 | 0.8115 |
| Zscore_PCC_KW_19_AE      | 0.8387 [0.8121-0.8654] | 0.0136 | 0.8479 | 0.4909 | 0.5392 | 0.7659 | 1.1642 | 0.6838 | 0.848  | 0.8182 | 0.7284 |
| Zscore_PCC_KW_19_RF      | 1 [nan-nan]            | 0      | 1      | 0.645  | 1      | 1      | 1      | 1      | 1      | 1      | 1      |
| Zscore_PCC_KW_19_LR      | 0.8911 [0.8698-0.9125] | 0.0109 | 0.8841 | 0.429  | 0.6328 | 0.815  | 0.9044 | 0.8627 | 0.7672 | 0.7875 | 0.8482 |
| Zscore_PCC_KW_19_LRLasso | 0.8937 [0.8727-0.9148] | 0.0107 | 0.8877 | 0.4747 | 0.6277 | 0.8137 | 0.9706 | 0.8284 | 0.799  | 0.8048 | 0.8232 |
| Zscore_PCC_KW_19_AB      | 1 [nan-nan]            | 0      | 1      | 0.5001 | 1      | 1      | 1      | 1      | 1      | 1      | 1      |
| Zscore_PCC_KW_19_DT      | 1 [nan-nan]            | 0      | 1      | 1      | 1      | 1      | 1      | 1      | 1      | 1      | 1      |
| Zscore_PCC_KW_19_GP      | 0.9811 [0.9726-0.9896] | 0.0043 | 0.9805 | 0.4981 | 0.9119 | 0.9559 | 0.9853 | 0.9632 | 0.9485 | 0.9493 | 0.9627 |
| Zscore_PCC_KW_19_NB      | 0.7914 [0.7606-0.8222] | 0.0157 | 0.7865 | 1      | 0.4788 | 0.7365 | 1.1544 | 0.6593 | 0.8137 | 0.7797 | 0.7049 |
| Zscore_PCC_KW_20_SVM     | 0.903 [0.8828-0.9232]  | 0.0103 | 0.8962 | 0.4646 | 0.6529 | 0.826  | 0.9461 | 0.8529 | 0.799  | 0.8093 | 0.8446 |
| Zscore_PCC_KW_20_LDA     | 0.9029 [0.8831-0.9227] | 0.0101 | 0.9002 | 0.4259 | 0.6533 | 0.826  | 0.9363 | 0.8578 | 0.7941 | 0.8065 | 0.8482 |
| Zscore_PCC_KW_20_AE      | 0.7399 [0.7061-0.7737] | 0.0172 | 0.7009 | 0.5194 | 0.3806 | 0.6887 | 0.8725 | 0.7525 | 0.625  | 0.6674 | 0.7163 |
| Zscore_PCC_KW_20_RF      | 1 [nan-nan]            | 0      | 1      | 0.63   | 1      | 1      | 1      | 1      | 1      | 1      | 1      |
| Zscore_PCC_KW_20_LR      | 0.8929 [0.8718-0.9141] | 0.0108 | 0.8863 | 0.4004 | 0.6308 | 0.8125 | 0.8652 | 0.8799 | 0.7451 | 0.7754 | 0.8612 |
| Zscore_PCC_KW_20_LRLasso | 0.8971 [0.8765-0.9178] | 0.0105 | 0.8914 | 0.3892 | 0.6552 | 0.8223 | 0.8211 | 0.9118 | 0.7328 | 0.7734 | 0.8925 |
| Zscore_PCC_KW_20_AB      | 1 [nan-nan]            | 0      | 1      | 0.5036 | 1      | 1      | 1      | 1      | 1      | 1      | 1      |
| Zscore_PCC_KW_20_DT      | 1 [nan-nan]            | 0      | 1      | 1      | 1      | 1      | 1      | 1      | 1      | 1      | 1      |
| Zscore_PCC_KW_20_GP      | 0.9848 [0.9773-0.9923] | 0.0038 | 0.984  | 0.4995 | 0.9167 | 0.9583 | 0.9951 | 0.9608 | 0.9559 | 0.9561 | 0.9606 |
| Zscore_PCC_KW_20_NB      | 0.7856 [0.7544-0.8168] | 0.0159 | 0.7781 | 1      | 0.4539 | 0.7267 | 1.0466 | 0.7034 | 0.75   | 0.7378 | 0.7166 |
| Zscore_PCC_RFE_1_SVM     | 0.7289 [0.6947-0.7632] | 0.0175 | 0.6982 | 0.4606 | 0.3843 | 0.6863 | 0.7549 | 0.8088 | 0.5637 | 0.6496 | 0.7468 |
| Zscore_PCC_RFE_1_LDA     | 0.7276 [0.6932-0.7619] | 0.0175 | 0.6951 | 0.498  | 0.367  | 0.6814 | 0.848  | 0.7574 | 0.6054 | 0.6574 | 0.7139 |
| Zscore_PCC_RFE_1_AE      | 0.7126 [0.6774-0.7477] | 0.0179 | 0.6829 | 0.5252 | 0.3414 | 0.6703 | 0.9338 | 0.7034 | 0.6373 | 0.6598 | 0.6824 |
| Zscore_PCC_RFE_1_RF      | 1 [nan-nan]            | 0      | 1      | 0.58   | 1      | 1      | 1      | 1      | 1      | 1      | 1      |
| Zscore_PCC_RFE_1_LR      | 0.7288 [0.6945-0.7631] | 0.0175 | 0.6981 | 0.4528 | 0.3756 | 0.6814 | 0.7402 | 0.8113 | 0.5515 | 0.644  | 0.745  |
| Zscore_PCC_RFE_1_LRLasso | 0.7289 [0.6946-0.7631] | 0.0175 | 0.6982 | 0.4632 | 0.3802 | 0.6838 | 0.7451 | 0.8113 | 0.5564 | 0.6465 | 0.7467 |
| Zscore_PCC_RFE_1_AB      | 0.9 [0.8804-0.9197]    | 0.01   | 0.9056 | 0.4997 | 0.616  | 0.8064 | 0.8971 | 0.8578 | 0.7549 | 0.7778 | 0.8415 |
| Zscore_PCC_RFE_1_DT      | 1 [nan-nan]            | 0      | 1      | 1      | 1      | 1      | 1      | 1      | 1      | 1      | 1      |
| Zscore_PCC_RFE_1_GP      | 0.7299 [0.6956-0.7642] | 0.0175 | 0.7107 | 0.5244 | 0.3689 | 0.6838 | 0.9167 | 0.7255 | 0.6422 | 0.6697 | 0.7005 |
| Zscore_PCC_RFE_1_NB      | 0.703 [0.6675-0.7386]  | 0.0182 | 0.6649 | 0.5156 | 0.3355 | 0.6618 | 0.7353 | 0.7941 | 0.5294 | 0.6279 | 0.72   |
| Zscore_PCC_RFE_2_SVM     | 0.8078 [0.7790-0.8366] | 0.0147 | 0.817  | 0.5793 | 0.4648 | 0.7316 | 1.0809 | 0.6912 | 0.7721 | 0.752  | 0.7143 |
| Zscore_PCC_RFE_2_LDA     | 0.8049 [0.7758-0.8339] | 0.0148 | 0.8129 | 0.5828 | 0.4543 | 0.7267 | 1.0613 | 0.6961 | 0.7574 | 0.7415 | 0.7136 |
| Zscore_PCC_RFE_2_AE      | 0.8 [0.7705-0.8294]    | 0.015  | 0.8062 | 0.4582 | 0.4365 | 0.7169 | 0.8897 | 0.7721 | 0.6618 | 0.6954 | 0.7438 |
| Zscore_PCC_RFE_2_RF      | 1 [nan-nan]            | 0      | 1      | 0.585  | 1      | 1      | 1      | 1      | 1      | 1      | 1      |
| Zscore_PCC_RFE_2_LR      | 0.8078 [0.7790-0.8366] | 0.0147 | 0.8174 | 0.5731 | 0.4666 | 0.7328 | 1.0637 | 0.701  | 0.7647 | 0.7487 | 0.7189 |
| Zscore_PCC_RFE_2_LRLasso | 0.8079 [0.7791-0.8367] | 0.0147 | 0.8177 | 0.5773 | 0.4668 | 0.7328 | 1.0686 | 0.6985 | 0.7672 | 0.75   | 0.7179 |
| Zscore_PCC_RFE_2_AB      | 0.9605 [0.9499-0.9712] | 0.0054 | 0.9629 | 0.4985 | 0.7549 | 0.8762 | 0.9191 | 0.9167 | 0.8358 | 0.8481 | 0.9093 |
| Zscore_PCC_RFE_2_DT      | 1 [nan-nan]            | 0      | 1      | 1      | 1      | 1      | 1      | 1      | 1      | 1      | 1      |
| Zscore_PCC_RFE_2_GP      | 0.8154 [0.7869-0.8438] | 0.0145 | 0.8179 | 0.5492 | 0.4797 | 0.739  | 1.0858 | 0.6961 | 0.7819 | 0.7614 | 0.7201 |
| Zscore_PCC_RFE_2_NB      | 0.7768 [0.7455-0.8081] | 0.016  | 0.7581 | 0.6987 | 0.4099 | 0.7047 | 1.0515 | 0.6789 | 0.7304 | 0.7158 | 0.6946 |
| Zscore_PCC_RFE_3_SVM     | 0.8419 [0.8159-0.8679] | 0.0133 | 0.8546 | 0.6317 | 0.5305 | 0.7586 | 1.223  | 0.6471 | 0.8701 | 0.8328 | 0.7114 |
| Zscore_PCC_RFE_3_LDA     | 0.8388 [0.8128-0.8648] | 0.0133 | 0.8578 | 0.6792 | 0.5142 | 0.7488 | 1.2525 | 0.6225 | 0.875  | 0.8328 | 0.6986 |
| Zscore_PCC_RFE_3_AE      | 0.7826 [0.7513-0.8138] | 0.0159 | 0.823  | 0.4924 | 0.4705 | 0.7267 | 1.2672 | 0.5931 | 0.8603 | 0.8094 | 0.6789 |
| Zscore_PCC_RFE_3_RF      | 1 [nan-nan]            | 0      | 1      | 0.58   | 1      | 1      | 1      | 1      | 1      | 1      | 1      |
| Zscore_PCC_RFE_3_LR      | 0.8422 [0.8163-0.8681] | 0.0132 | 0.8549 | 0.6399 | 0.526  | 0.7574 | 1.2059 | 0.6544 | 0.8603 | 0.8241 | 0.7134 |
| Zscore_PCC_RFE_3_LRLasso | 0.8424 [0.8165-0.8682] | 0.0132 | 0.8555 | 0.6413 | 0.5237 | 0.7561 | 1.2083 | 0.652  | 0.8603 | 0.8235 | 0.712  |
| Zscore_PCC_RFE_3_AB      | 0.9856 [0.9803-0.9908] | 0.0027 | 0.986  | 0.5006 | 0.8538 | 0.9265 | 1.0441 | 0.9044 | 0.9485 | 0.9462 | 0.9085 |
| Zscore_PCC_RFE_3_DT      | 1 [nan-nan]            | 0      | 1      | 1      | 1      | 1      | 1      | 1      | 1      | 1      | 1      |
| Zscore_PCC_RFE_3_GP      | 0.857 [0.8321-0.8819]  | 0.0127 | 0.8693 | 0.5394 | 0.5559 | 0.7745 | 1.1569 | 0.6961 | 0.8529 | 0.8256 | 0.7373 |
| Zscore_PCC_RFE_3_NB      | 0.8118 [0.7835-0.8400] | 0.0144 | 0.8296 | 0.8062 | 0.4704 | 0.7255 | 1.2843 | 0.5833 | 0.8676 | 0.8151 | 0.6756 |
| Zscore_PCC_RFE_4_SVM     | 0.8644 [0.8402-0.8886] | 0.0124 | 0.8571 | 0.4497 | 0.5711 | 0.7843 | 0.9069 | 0.8309 | 0.7377 | 0.7601 | 0.8135 |
| Zscore_PCC_RFE_4_LDA     | 0.8596 [0.8354-0.8839] | 0.0124 | 0.8625 | 0.4627 | 0.5458 | 0.7721 | 0.9216 | 0.8113 | 0.7328 | 0.7523 | 0.7952 |
| Zscore_PCC_RFE_4_AE      | 0.7989 [0.7687-0.8291] | 0.0154 | 0.7549 | 0.4745 | 0.4848 | 0.7414 | 1.0907 | 0.6961 | 0.7868 | 0.7655 | 0.7213 |
| Zscore_PCC_RFE_4_RF      | 1 [nan-nan]            | 0      | 1      | 0.625  | 1      | 1      | 1      | 1      | 1      | 1      | 1      |
| Zscore_PCC_RFE_4_LR      | 0.865 [0.8410-0.8891]  | 0.0123 | 0.8603 | 0.4131 | 0.5741 | 0.7843 | 0.8627 | 0.8529 | 0.7157 | 0.75   | 0.8295 |
| Zscore_PCC_RFE_4_LRLasso | 0.8649 [0.8409-0.8889] | 0.0123 | 0.8614 | 0.5201 | 0.5639 | 0.7819 | 1.0245 | 0.7696 | 0.7941 | 0.7889 | 0.7751 |

|                           |                        |        |        |        |        |        |        |        |        |        |        |
|---------------------------|------------------------|--------|--------|--------|--------|--------|--------|--------|--------|--------|--------|
| Zscore_PCC_RFE_4_AB       | 0.9953 [0.9929-0.9978] | 0.0012 | 0.9955 | 0.5021 | 0.9227 | 0.9608 | 1.049  | 0.9363 | 0.9853 | 0.9845 | 0.9393 |
| Zscore_PCC_RFE_4_DT       | 1 [nan-nan]            | 0      | 1      | 1      | 1      | 1      | 1      | 1      | 1      | 1      | 1      |
| Zscore_PCC_RFE_4_GP       | 0.8915 [0.8702-0.9129] | 0.0109 | 0.887  | 0.5004 | 0.625  | 0.8125 | 1.0074 | 0.8088 | 0.8162 | 0.8148 | 0.8102 |
| Zscore_PCC_RFE_4_NB       | 0.8293 [0.8023-0.8564] | 0.0138 | 0.8352 | 0.6969 | 0.4976 | 0.7488 | 1.0123 | 0.7426 | 0.7549 | 0.7519 | 0.7458 |
| Zscore_PCC_RFE_5_SVM      | 0.8675 [0.8436-0.8914] | 0.0122 | 0.8643 | 0.4894 | 0.5784 | 0.7892 | 0.9951 | 0.7917 | 0.7868 | 0.7878 | 0.7906 |
| Zscore_PCC_RFE_5_LDA      | 0.8612 [0.8371-0.8852] | 0.0123 | 0.864  | 0.4699 | 0.5498 | 0.7745 | 0.9461 | 0.8015 | 0.7475 | 0.7605 | 0.7902 |
| Zscore_PCC_RFE_5_AE       | 0.794 [0.7638-0.8242]  | 0.0154 | 0.7956 | 0.495  | 0.4634 | 0.7255 | 1.2304 | 0.6103 | 0.8407 | 0.793  | 0.6833 |
| Zscore_PCC_RFE_5_RF       | 1 [nan-nan]            | 0      | 1      | 0.615  | 1      | 1      | 1      | 1      | 1      | 1      | 1      |
| Zscore_PCC_RFE_5_LR       | 0.8682 [0.8445-0.8919] | 0.0121 | 0.8647 | 0.4974 | 0.5858 | 0.7929 | 1.0025 | 0.7917 | 0.7941 | 0.7936 | 0.7922 |
| Zscore_PCC_RFE_5_LRLasso  | 0.8673 [0.8436-0.8910] | 0.0121 | 0.8649 | 0.5235 | 0.5737 | 0.7868 | 1.0245 | 0.7745 | 0.799  | 0.794  | 0.7799 |
| Zscore_PCC_RFE_5_AB       | 0.9981 [0.9969-0.9994] | 0.0006 | 0.9982 | 0.4992 | 0.9562 | 0.9779 | 0.9755 | 0.9902 | 0.9657 | 0.9665 | 0.9899 |
| Zscore_PCC_RFE_5_DT       | 1 [nan-nan]            | 0      | 1      | 1      | 1      | 1      | 1      | 1      | 1      | 1      | 1      |
| Zscore_PCC_RFE_5_GP       | 0.8992 [0.8783-0.9201] | 0.0107 | 0.8914 | 0.4936 | 0.6619 | 0.8309 | 0.9804 | 0.8407 | 0.8211 | 0.8245 | 0.8375 |
| Zscore_PCC_RFE_5_NB       | 0.8238 [0.7961-0.8515] | 0.0141 | 0.8272 | 0.7853 | 0.5181 | 0.7586 | 1.0613 | 0.7279 | 0.7892 | 0.7755 | 0.7436 |
| Zscore_PCC_RFE_6_SVM      | 0.8728 [0.8494-0.8961] | 0.0119 | 0.8667 | 0.4935 | 0.5932 | 0.7966 | 1.0098 | 0.7917 | 0.8015 | 0.7995 | 0.7937 |
| Zscore_PCC_RFE_6_LDA      | 0.8677 [0.8442-0.8912] | 0.012  | 0.8651 | 0.4836 | 0.5613 | 0.7806 | 0.9975 | 0.7819 | 0.7794 | 0.78   | 0.7813 |
| Zscore_PCC_RFE_6_AE       | 0.8083 [0.7789-0.8376] | 0.015  | 0.8166 | 0.4817 | 0.505  | 0.7512 | 1.1005 | 0.701  | 0.8015 | 0.7793 | 0.7283 |
| Zscore_PCC_RFE_6_RF       | 1 [nan-nan]            | 0      | 1      | 0.66   | 1      | 1      | 1      | 1      | 1      | 1      | 1      |
| Zscore_PCC_RFE_6_LR       | 0.8738 [0.8506-0.8970] | 0.0118 | 0.8676 | 0.503  | 0.5957 | 0.7978 | 1.0221 | 0.7868 | 0.8088 | 0.8045 | 0.7914 |
| Zscore_PCC_RFE_6_LRLasso  | 0.8728 [0.8496-0.8960] | 0.0118 | 0.868  | 0.5212 | 0.5837 | 0.7917 | 1.0343 | 0.7745 | 0.8088 | 0.802  | 0.782  |
| Zscore_PCC_RFE_6_AB       | 0.999 [0.9983-0.9998]  | 0.0004 | 0.9991 | 0.4999 | 0.9731 | 0.9865 | 0.9926 | 0.9902 | 0.9828 | 0.983  | 0.9901 |
| Zscore_PCC_RFE_6_DT       | 1 [nan-nan]            | 0      | 1      | 1      | 1      | 1      | 1      | 1      | 1      | 1      | 1      |
| Zscore_PCC_RFE_6_GP       | 0.9104 [0.8908-0.9299] | 0.01   | 0.9007 | 0.4763 | 0.6959 | 0.8468 | 0.9191 | 0.8873 | 0.8064 | 0.8209 | 0.8773 |
| Zscore_PCC_RFE_6_NB       | 0.8296 [0.8024-0.8568] | 0.0139 | 0.8374 | 0.7773 | 0.5147 | 0.7574 | 1.0098 | 0.7525 | 0.7623 | 0.7599 | 0.7549 |
| Zscore_PCC_RFE_7_SVM      | 0.8765 [0.8535-0.8994] | 0.0117 | 0.8705 | 0.5289 | 0.5937 | 0.7966 | 1.0441 | 0.7745 | 0.8186 | 0.8103 | 0.784  |
| Zscore_PCC_RFE_7_LDA      | 0.8737 [0.8507-0.8966] | 0.0117 | 0.8712 | 0.5497 | 0.5877 | 0.7929 | 1.0809 | 0.7525 | 0.8333 | 0.8187 | 0.771  |
| Zscore_PCC_RFE_7_AE       | 0.8003 [0.7703-0.8303] | 0.0153 | 0.8004 | 0.5466 | 0.4969 | 0.7463 | 0.8701 | 0.8113 | 0.6814 | 0.718  | 0.7831 |
| Zscore_PCC_RFE_7_RF       | 1 [nan-nan]            | 0      | 1      | 0.655  | 1      | 1      | 1      | 1      | 1      | 1      | 1      |
| Zscore_PCC_RFE_7_LR       | 0.8783 [0.8557-0.9009] | 0.0115 | 0.8736 | 0.5349 | 0.6016 | 0.8002 | 1.0613 | 0.7696 | 0.8309 | 0.8198 | 0.7829 |
| Zscore_PCC_RFE_7_LRLasso  | 0.8748 [0.8518-0.8978] | 0.0117 | 0.8699 | 0.5104 | 0.5933 | 0.7966 | 1.0196 | 0.7868 | 0.8064 | 0.8025 | 0.7909 |
| Zscore_PCC_RFE_7_AB       | 0.9995 [0.9990-1.0000] | 0.0003 | 0.9995 | 0.5009 | 0.9878 | 0.9939 | 1.0074 | 0.9902 | 0.9975 | 0.9975 | 0.9903 |
| Zscore_PCC_RFE_7_DT       | 1 [nan-nan]            | 0      | 1      | 1      | 1      | 1      | 1      | 1      | 1      | 1      | 1      |
| Zscore_PCC_RFE_7_GP       | 0.9155 [0.8965-0.9346] | 0.0097 | 0.9052 | 0.4823 | 0.7083 | 0.8529 | 0.9167 | 0.8946 | 0.8113 | 0.8258 | 0.885  |
| Zscore_PCC_RFE_7_NB       | 0.8245 [0.7969-0.8522] | 0.0141 | 0.831  | 0.8333 | 0.5099 | 0.7549 | 0.9804 | 0.7647 | 0.7451 | 0.75   | 0.76   |
| Zscore_PCC_RFE_8_SVM      | 0.8821 [0.8598-0.9045] | 0.0114 | 0.8795 | 0.4643 | 0.6211 | 0.81   | 0.9436 | 0.8382 | 0.7819 | 0.7935 | 0.8286 |
| Zscore_PCC_RFE_8_LDA      | 0.8804 [0.8581-0.9027] | 0.0114 | 0.8792 | 0.5015 | 0.5959 | 0.7978 | 1.0319 | 0.7819 | 0.8137 | 0.8076 | 0.7886 |
| Zscore_PCC_RFE_8_AE       | 0.7023 [0.6666-0.7380] | 0.0182 | 0.6843 | 0.4981 | 0.3649 | 0.6789 | 0.8039 | 0.777  | 0.5809 | 0.6496 | 0.7226 |
| Zscore_PCC_RFE_8_RF       | 1 [nan-nan]            | 0      | 1      | 0.66   | 1      | 1      | 1      | 1      | 1      | 1      | 1      |
| Zscore_PCC_RFE_8_LR       | 0.8816 [0.8593-0.9039] | 0.0114 | 0.8775 | 0.5082 | 0.6128 | 0.8064 | 1.0147 | 0.799  | 0.8137 | 0.8109 | 0.8019 |
| Zscore_PCC_RFE_8_LRLasso  | 0.8785 [0.8558-0.9011] | 0.0116 | 0.8735 | 0.4943 | 0.6006 | 0.8002 | 0.9828 | 0.8088 | 0.7917 | 0.7952 | 0.8055 |
| Zscore_PCC_RFE_8_AB       | 0.9998 [0.9996-1.0000] | 0.0001 | 0.9998 | 0.5011 | 0.9878 | 0.9939 | 1.0123 | 0.9877 | 1      | 1      | 0.9879 |
| Zscore_PCC_RFE_8_DT       | 1 [nan-nan]            | 0      | 1      | 1      | 1      | 1      | 1      | 1      | 1      | 1      | 1      |
| Zscore_PCC_RFE_8_GP       | 0.9277 [0.9102-0.9453] | 0.009  | 0.9161 | 0.4862 | 0.7353 | 0.8664 | 0.9191 | 0.9069 | 0.826  | 0.839  | 0.8987 |
| Zscore_PCC_RFE_8_NB       | 0.8233 [0.7955-0.8511] | 0.0142 | 0.8332 | 0.8496 | 0.52   | 0.7598 | 0.9608 | 0.7794 | 0.7402 | 0.75   | 0.7704 |
| Zscore_PCC_RFE_9_SVM      | 0.8831 [0.8609-0.9053] | 0.0113 | 0.8804 | 0.4745 | 0.6209 | 0.81   | 0.9485 | 0.8358 | 0.7843 | 0.7949 | 0.8269 |
| Zscore_PCC_RFE_9_LDA      | 0.8814 [0.8591-0.9037] | 0.0114 | 0.8777 | 0.4515 | 0.6106 | 0.8051 | 0.9681 | 0.8211 | 0.7892 | 0.7957 | 0.8152 |
| Zscore_PCC_RFE_9_AE       | 0.7209 [0.6861-0.7558] | 0.0178 | 0.7038 | 0.4774 | 0.3554 | 0.6777 | 0.9926 | 0.6814 | 0.674  | 0.6764 | 0.679  |
| Zscore_PCC_RFE_9_RF       | 1 [nan-nan]            | 0      | 1      | 0.665  | 1      | 1      | 1      | 1      | 1      | 1      | 1      |
| Zscore_PCC_RFE_9_LR       | 0.8812 [0.8588-0.9035] | 0.0114 | 0.8767 | 0.5123 | 0.6128 | 0.8064 | 1.0098 | 0.8015 | 0.8113 | 0.8094 | 0.8034 |
| Zscore_PCC_RFE_9_LRLasso  | 0.8789 [0.8563-0.9015] | 0.0115 | 0.8741 | 0.5141 | 0.6005 | 0.8002 | 1.0123 | 0.7941 | 0.8064 | 0.804  | 0.7966 |
| Zscore_PCC_RFE_9_AB       | 0.9999 [0.9998-1.0000] | 0.0001 | 0.9999 | 0.4968 | 0.9927 | 0.9963 | 0.9926 | 1      | 0.9926 | 0.9927 | 1      |
| Zscore_PCC_RFE_9_DT       | 1 [nan-nan]            | 0      | 1      | 1      | 1      | 1      | 1      | 1      | 1      | 1      | 1      |
| Zscore_PCC_RFE_9_GP       | 0.9323 [0.9153-0.9494] | 0.0087 | 0.9198 | 0.4917 | 0.7619 | 0.8799 | 0.9265 | 0.9167 | 0.8431 | 0.8539 | 0.9101 |
| Zscore_PCC_RFE_9_NB       | 0.8225 [0.7944-0.8505] | 0.0143 | 0.8274 | 0.9128 | 0.5221 | 0.761  | 1.0172 | 0.7525 | 0.7696 | 0.7656 | 0.7566 |
| Zscore_PCC_RFE_10_SVM     | 0.8825 [0.8603-0.9048] | 0.0113 | 0.8803 | 0.4737 | 0.6306 | 0.815  | 0.9534 | 0.8382 | 0.7917 | 0.8009 | 0.8303 |
| Zscore_PCC_RFE_10_LDA     | 0.8827 [0.8606-0.9048] | 0.0113 | 0.8795 | 0.5042 | 0.6056 | 0.8027 | 1.027  | 0.7892 | 0.8162 | 0.8111 | 0.7947 |
| Zscore_PCC_RFE_10_AE      | 0.7963 [0.7663-0.8262] | 0.0153 | 0.7873 | 0.5353 | 0.4689 | 0.7316 | 1.1544 | 0.6544 | 0.8088 | 0.7739 | 0.7006 |
| Zscore_PCC_RFE_10_RF      | 1 [nan-nan]            | 0      | 1      | 0.645  | 1      | 1      | 1      | 1      | 1      | 1      | 1      |
| Zscore_PCC_RFE_10_LR      | 0.8819 [0.8597-0.9041] | 0.0113 | 0.8773 | 0.5171 | 0.6055 | 0.8027 | 1.0221 | 0.7917 | 0.8137 | 0.8095 | 0.7962 |
| Zscore_PCC_RFE_10_LRLasso | 0.8793 [0.8568-0.9018] | 0.0115 | 0.8746 | 0.4953 | 0.5981 | 0.799  | 0.9853 | 0.8064 | 0.7917 | 0.7947 | 0.8035 |
| Zscore_PCC_RFE_10_AB      | 1 [0.9999-1.0000]      | 0      | 1      | 0.502  | 0.9951 | 0.9975 | 1.0049 | 0.9951 | 1      | 1      | 0.9951 |
| Zscore_PCC_RFE_10_DT      | 1 [nan-nan]            | 0      | 1      | 1      | 1      | 1      | 1      | 1      | 1      | 1      | 1      |
| Zscore_PCC_RFE_10_GP      | 0.9461 [0.9313-0.9609] | 0.0076 | 0.9396 | 0.4927 | 0.7906 | 0.8946 | 0.9412 | 0.924  | 0.8652 | 0.8727 | 0.9193 |
| Zscore_PCC_RFE_10_NB      | 0.8231 [0.7951-0.8510] | 0.0143 | 0.8309 | 0.963  | 0.5166 | 0.7561 | 1.1299 | 0.6912 | 0.8211 | 0.7944 | 0.7267 |
| Zscore_PCC_RFE_11_SVM     | 0.8896 [0.8680-0.9112] | 0.011  | 0.8853 | 0.4644 | 0.6334 | 0.8162 | 0.9412 | 0.8456 | 0.7868 | 0.7986 | 0.8359 |
| Zscore_PCC_RFE_11_LDA     | 0.889 [0.8675-0.9104]  | 0.0109 | 0.8874 | 0.4826 | 0.6226 | 0.8113 | 1.0098 | 0.8064 | 0.8162 | 0.8144 | 0.8083 |
| Zscore_PCC_RFE_11_AE      | 0.7839 [0.7528-0.8150] | 0.0159 | 0.7756 | 0.5633 | 0.463  | 0.7304 | 0.902  | 0.7794 | 0.6814 | 0.7098 | 0.7554 |
| Zscore_PCC_RFE_11_RF      | 1 [nan-nan]            | 0      | 1      | 0.66   | 1      | 1      | 1      | 1      | 1      | 1      | 1      |
| Zscore_PCC_RFE_11_LR      | 0.8874 [0.8658-0.9090] | 0.011  | 0.8838 | 0.4584 | 0.6185 | 0.8088 | 0.9461 | 0.8358 | 0.7819 | 0.793  | 0.8264 |
| Zscore_PCC_RFE_11_LRLasso | 0.8846 [0.8627-0.9066] | 0.0112 | 0.8801 | 0.5444 | 0.6086 | 0.8039 | 1.049  | 0.7794 | 0.8284 | 0.8196 | 0.7897 |
| Zscore_PCC_RFE_11_AB      | 1 [nan-nan]            | 0      | 1      | 0.5015 | 1      | 1      | 1      | 1      | 1      | 1      | 1      |
| Zscore_PCC_RFE_11_DT      | 1 [nan-nan]            | 0      | 1      | 1      | 1      | 1      | 1      | 1      | 1      | 1      | 1      |
| Zscore_PCC_RFE_11_GP      | 0.9578 [0.9448-0.9708] | 0.0066 | 0.9534 | 0.5016 | 0.8212 | 0.9105 | 0.9828 | 0.9191 | 0.902  | 0.9036 | 0.9177 |

|                           |                        |        |        |        |        |        |        |        |        |        |        |
|---------------------------|------------------------|--------|--------|--------|--------|--------|--------|--------|--------|--------|--------|
| Zscore_PCC_RFE_11_NB      | 0.8227 [0.7945-0.8508] | 0.0143 | 0.829  | 0.9628 | 0.5366 | 0.7672 | 1.0931 | 0.7206 | 0.8137 | 0.7946 | 0.7444 |
| Zscore_PCC_RFE_12_SVM     | 0.8972 [0.8764-0.9179] | 0.0106 | 0.8926 | 0.4423 | 0.6372 | 0.8174 | 0.9142 | 0.8603 | 0.7745 | 0.7923 | 0.8472 |
| Zscore_PCC_RFE_12_LDA     | 0.898 [0.8777-0.9184]  | 0.0104 | 0.8963 | 0.454  | 0.6496 | 0.8248 | 0.9828 | 0.8333 | 0.8162 | 0.8193 | 0.8304 |
| Zscore_PCC_RFE_12_AE      | 0.8063 [0.7771-0.8356] | 0.0149 | 0.8015 | 0.5543 | 0.4831 | 0.7414 | 1.0319 | 0.7255 | 0.7574 | 0.7494 | 0.734  |
| Zscore_PCC_RFE_12_RF      | 1 [nan-nan]            | 0      | 1      | 0.67   | 1      | 1      | 1      | 1      | 1      | 1      | 1      |
| Zscore_PCC_RFE_12_LR      | 0.895 [0.8743-0.9157]  | 0.0106 | 0.8909 | 0.5064 | 0.6227 | 0.8113 | 1.0245 | 0.799  | 0.8235 | 0.8191 | 0.8038 |
| Zscore_PCC_RFE_12_LRLasso | 0.8931 [0.8722-0.9140] | 0.0107 | 0.889  | 0.5168 | 0.6202 | 0.81   | 1.0221 | 0.799  | 0.8211 | 0.817  | 0.8034 |
| Zscore_PCC_RFE_12_AB      | 1 [1.0000-1.0000]      | 0      | 1      | 0.4992 | 0.9976 | 0.9988 | 0.9975 | 1      | 0.9975 | 0.9976 | 1      |
| Zscore_PCC_RFE_12_DT      | 1 [nan-nan]            | 0      | 1      | 1      | 1      | 1      | 1      | 1      | 1      | 1      | 1      |
| Zscore_PCC_RFE_12_GP      | 0.9653 [0.9534-0.9772] | 0.0061 | 0.961  | 0.5165 | 0.8358 | 0.9179 | 1.0123 | 0.9118 | 0.924  | 0.9231 | 0.9128 |
| Zscore_PCC_RFE_12_NB      | 0.8205 [0.7922-0.8488] | 0.0144 | 0.8271 | 0.9737 | 0.5268 | 0.7623 | 1.0931 | 0.7157 | 0.8088 | 0.7892 | 0.7399 |
| Zscore_PCC_RFE_13_SVM     | 0.9022 [0.8820-0.9224] | 0.0103 | 0.8965 | 0.4359 | 0.6594 | 0.8284 | 0.9118 | 0.8725 | 0.7843 | 0.8018 | 0.8602 |
| Zscore_PCC_RFE_13_LDA     | 0.9026 [0.8828-0.9225] | 0.0101 | 0.9013 | 0.4519 | 0.6471 | 0.8235 | 0.9902 | 0.8284 | 0.8186 | 0.8204 | 0.8267 |
| Zscore_PCC_RFE_13_AE      | 0.7918 [0.7616-0.8219] | 0.0154 | 0.7932 | 0.4647 | 0.4635 | 0.7304 | 0.8922 | 0.7843 | 0.6765 | 0.708  | 0.7582 |
| Zscore_PCC_RFE_13_RF      | 1 [nan-nan]            | 0      | 1      | 0.625  | 1      | 1      | 1      | 1      | 1      | 1      | 1      |
| Zscore_PCC_RFE_13_LR      | 0.8987 [0.8783-0.9190] | 0.0104 | 0.8944 | 0.5149 | 0.6326 | 0.8162 | 1.0294 | 0.8015 | 0.8309 | 0.8258 | 0.8071 |
| Zscore_PCC_RFE_13_LRLasso | 0.8967 [0.8762-0.9171] | 0.0105 | 0.8929 | 0.5183 | 0.6276 | 0.8137 | 1.0245 | 0.8015 | 0.826  | 0.8216 | 0.8062 |
| Zscore_PCC_RFE_13_AB      | 1 [nan-nan]            | 0      | 1      | 0.5022 | 1      | 1      | 1      | 1      | 1      | 1      | 1      |
| Zscore_PCC_RFE_13_DT      | 1 [nan-nan]            | 0      | 1      | 1      | 1      | 1      | 1      | 1      | 1      | 1      | 1      |
| Zscore_PCC_RFE_13_GP      | 0.9769 [0.9674-0.9863] | 0.0048 | 0.9748 | 0.5012 | 0.8799 | 0.94   | 0.9926 | 0.9436 | 0.9363 | 0.9367 | 0.9432 |
| Zscore_PCC_RFE_13_NB      | 0.8245 [0.7965-0.8525] | 0.0143 | 0.834  | 0.9775 | 0.5334 | 0.7647 | 1.1225 | 0.7034 | 0.826  | 0.8017 | 0.7358 |
| Zscore_PCC_RFE_14_SVM     | 0.9047 [0.8846-0.9247] | 0.0102 | 0.899  | 0.4247 | 0.6742 | 0.8358 | 0.9118 | 0.8799 | 0.7917 | 0.8086 | 0.8683 |
| Zscore_PCC_RFE_14_LDA     | 0.9041 [0.8845-0.9238] | 0.01   | 0.9033 | 0.4589 | 0.652  | 0.826  | 1.0098 | 0.8211 | 0.8309 | 0.8292 | 0.8228 |
| Zscore_PCC_RFE_14_AE      | 0.8107 [0.7819-0.8395] | 0.0147 | 0.8    | 0.5804 | 0.4844 | 0.7377 | 0.8088 | 0.8333 | 0.6422 | 0.6996 | 0.7939 |
| Zscore_PCC_RFE_14_RF      | 1 [nan-nan]            | 0      | 1      | 0.645  | 1      | 1      | 1      | 1      | 1      | 1      | 1      |
| Zscore_PCC_RFE_14_LR      | 0.8998 [0.8796-0.9199] | 0.0103 | 0.8952 | 0.4254 | 0.6421 | 0.8199 | 0.9142 | 0.8627 | 0.777  | 0.7946 | 0.8499 |
| Zscore_PCC_RFE_14_LRLasso | 0.8982 [0.8779-0.9185] | 0.0104 | 0.8948 | 0.4944 | 0.625  | 0.8125 | 0.9926 | 0.8162 | 0.8088 | 0.8102 | 0.8148 |
| Zscore_PCC_RFE_14_AB      | 1 [nan-nan]            | 0      | 1      | 0.5031 | 1      | 1      | 1      | 1      | 1      | 1      | 1      |
| Zscore_PCC_RFE_14_DT      | 1 [nan-nan]            | 0      | 1      | 1      | 1      | 1      | 1      | 1      | 1      | 1      | 1      |
| Zscore_PCC_RFE_14_GP      | 0.9806 [0.9718-0.9893] | 0.0045 | 0.9784 | 0.5056 | 0.8922 | 0.9461 | 1.0049 | 0.9436 | 0.9485 | 0.9483 | 0.9439 |
| Zscore_PCC_RFE_14_NB      | 0.8207 [0.7924-0.8490] | 0.0144 | 0.8283 | 0.9805 | 0.5262 | 0.761  | 1.125  | 0.6985 | 0.8235 | 0.7983 | 0.732  |
| Zscore_PCC_RFE_15_SVM     | 0.9069 [0.8871-0.9267] | 0.0101 | 0.9027 | 0.4267 | 0.6716 | 0.8346 | 0.9142 | 0.8775 | 0.7917 | 0.8081 | 0.866  |
| Zscore_PCC_RFE_15_LDA     | 0.906 [0.8866-0.9255]  | 0.0099 | 0.9066 | 0.4561 | 0.6593 | 0.8297 | 0.9975 | 0.8309 | 0.8284 | 0.8289 | 0.8305 |
| Zscore_PCC_RFE_15_AE      | 0.8193 [0.7907-0.8479] | 0.0146 | 0.8073 | 0.5003 | 0.5341 | 0.7647 | 0.8676 | 0.8309 | 0.6985 | 0.7338 | 0.8051 |
| Zscore_PCC_RFE_15_RF      | 1 [nan-nan]            | 0      | 1      | 0.66   | 1      | 1      | 1      | 1      | 1      | 1      | 1      |
| Zscore_PCC_RFE_15_LR      | 0.9011 [0.8810-0.9211] | 0.0102 | 0.8965 | 0.5261 | 0.645  | 0.8223 | 1.0368 | 0.8039 | 0.8407 | 0.8346 | 0.8109 |
| Zscore_PCC_RFE_15_LRLasso | 0.9003 [0.8801-0.9204] | 0.0103 | 0.8969 | 0.4809 | 0.6399 | 0.8199 | 0.973  | 0.8333 | 0.8064 | 0.8115 | 0.8287 |
| Zscore_PCC_RFE_15_AB      | 1 [nan-nan]            | 0      | 1      | 0.5014 | 1      | 1      | 1      | 1      | 1      | 1      | 1      |
| Zscore_PCC_RFE_15_DT      | 1 [nan-nan]            | 0      | 1      | 1      | 1      | 1      | 1      | 1      | 1      | 1      | 1      |
| Zscore_PCC_RFE_15_GP      | 0.9882 [0.9822-0.9942] | 0.003  | 0.9886 | 0.4966 | 0.9216 | 0.9608 | 0.9902 | 0.9657 | 0.9559 | 0.9563 | 0.9653 |
| Zscore_PCC_RFE_15_NB      | 0.8208 [0.7926-0.8490] | 0.0144 | 0.8292 | 0.9825 | 0.518  | 0.7574 | 1.1127 | 0.701  | 0.8137 | 0.7901 | 0.7313 |
| Zscore_PCC_RFE_16_SVM     | 0.9094 [0.8900-0.9288] | 0.0099 | 0.9056 | 0.4392 | 0.6786 | 0.8382 | 0.9216 | 0.8775 | 0.799  | 0.8136 | 0.867  |
| Zscore_PCC_RFE_16_LDA     | 0.9097 [0.8907-0.9286] | 0.0097 | 0.9084 | 0.4759 | 0.6571 | 0.8284 | 1.0294 | 0.8137 | 0.8431 | 0.8384 | 0.819  |
| Zscore_PCC_RFE_16_AE      | 0.8123 [0.7835-0.8412] | 0.0147 | 0.8159 | 0.4953 | 0.4905 | 0.7439 | 1.1054 | 0.6912 | 0.7966 | 0.7726 | 0.7206 |
| Zscore_PCC_RFE_16_RF      | 1 [nan-nan]            | 0      | 1      | 0.655  | 1      | 1      | 1      | 1      | 1      | 1      | 1      |
| Zscore_PCC_RFE_16_LR      | 0.9031 [0.8832-0.9231] | 0.0102 | 0.8976 | 0.5013 | 0.6642 | 0.8321 | 0.9975 | 0.8333 | 0.8309 | 0.8313 | 0.8329 |
| Zscore_PCC_RFE_16_LRLasso | 0.9036 [0.8838-0.9234] | 0.0101 | 0.9004 | 0.5124 | 0.6569 | 0.8284 | 1      | 0.8284 | 0.8284 | 0.8284 | 0.8284 |
| Zscore_PCC_RFE_16_AB      | 1 [nan-nan]            | 0      | 1      | 0.5035 | 1      | 1      | 1      | 1      | 1      | 1      | 1      |
| Zscore_PCC_RFE_16_DT      | 1 [nan-nan]            | 0      | 1      | 1      | 1      | 1      | 1      | 1      | 1      | 1      | 1      |
| Zscore_PCC_RFE_16_GP      | 0.9909 [0.9856-0.9961] | 0.0027 | 0.9915 | 0.5077 | 0.9314 | 0.9657 | 0.9951 | 0.9681 | 0.9632 | 0.9634 | 0.968  |
| Zscore_PCC_RFE_16_NB      | 0.8239 [0.7960-0.8518] | 0.0142 | 0.8298 | 0.9816 | 0.5105 | 0.7525 | 1.1471 | 0.6789 | 0.826  | 0.796  | 0.7201 |
| Zscore_PCC_RFE_17_SVM     | 0.9096 [0.8902-0.9290] | 0.0099 | 0.9058 | 0.4566 | 0.6824 | 0.8407 | 0.9461 | 0.8676 | 0.8137 | 0.8233 | 0.8601 |
| Zscore_PCC_RFE_17_LDA     | 0.9103 [0.8914-0.9291] | 0.0096 | 0.9099 | 0.5133 | 0.6529 | 0.826  | 1.0539 | 0.799  | 0.8529 | 0.8446 | 0.8093 |
| Zscore_PCC_RFE_17_AE      | 0.8269 [0.7988-0.8550] | 0.0143 | 0.825  | 0.5312 | 0.5454 | 0.7721 | 0.9314 | 0.8064 | 0.7377 | 0.7546 | 0.7921 |
| Zscore_PCC_RFE_17_RF      | 1 [nan-nan]            | 0      | 1      | 0.655  | 1      | 1      | 1      | 1      | 1      | 1      | 1      |
| Zscore_PCC_RFE_17_LR      | 0.9028 [0.8829-0.9228] | 0.0102 | 0.8981 | 0.4717 | 0.6671 | 0.8333 | 0.9657 | 0.8505 | 0.8162 | 0.8223 | 0.8452 |
| Zscore_PCC_RFE_17_LRLasso | 0.9036 [0.8838-0.9233] | 0.0101 | 0.9006 | 0.5085 | 0.6569 | 0.8284 | 1.0098 | 0.8235 | 0.8333 | 0.8317 | 0.8252 |
| Zscore_PCC_RFE_17_AB      | 1 [nan-nan]            | 0      | 1      | 0.5055 | 1      | 1      | 1      | 1      | 1      | 1      | 1      |
| Zscore_PCC_RFE_17_DT      | 1 [nan-nan]            | 0      | 1      | 1      | 1      | 1      | 1      | 1      | 1      | 1      | 1      |
| Zscore_PCC_RFE_17_GP      | 0.9947 [0.9908-0.9986] | 0.002  | 0.9954 | 0.5169 | 0.9535 | 0.9767 | 1.0123 | 0.9706 | 0.9828 | 0.9826 | 0.9709 |
| Zscore_PCC_RFE_17_NB      | 0.8251 [0.7972-0.8529] | 0.0142 | 0.8292 | 0.9817 | 0.5186 | 0.7574 | 1.1225 | 0.6961 | 0.8186 | 0.7933 | 0.7293 |
| Zscore_PCC_RFE_18_SVM     | 0.912 [0.8930-0.9310]  | 0.0097 | 0.908  | 0.4501 | 0.6875 | 0.8431 | 0.9412 | 0.8725 | 0.8137 | 0.8241 | 0.8646 |
| Zscore_PCC_RFE_18_LDA     | 0.9135 [0.8952-0.9318] | 0.0093 | 0.9145 | 0.548  | 0.6638 | 0.8309 | 1.0784 | 0.7917 | 0.8701 | 0.859  | 0.8068 |
| Zscore_PCC_RFE_18_AE      | 0.7782 [0.7468-0.8097] | 0.0161 | 0.7621 | 0.5231 | 0.4535 | 0.7267 | 1.0221 | 0.7157 | 0.7377 | 0.7318 | 0.7218 |
| Zscore_PCC_RFE_18_RF      | 1 [nan-nan]            | 0      | 1      | 0.655  | 1      | 1      | 1      | 1      | 1      | 1      | 1      |
| Zscore_PCC_RFE_18_LR      | 0.9049 [0.8853-0.9245] | 0.01   | 0.9001 | 0.4834 | 0.6545 | 0.8272 | 0.9877 | 0.8333 | 0.8211 | 0.8232 | 0.8313 |
| Zscore_PCC_RFE_18_LRLasso | 0.9072 [0.8880-0.9265] | 0.0098 | 0.9031 | 0.5154 | 0.652  | 0.826  | 1.0147 | 0.8186 | 0.8333 | 0.8308 | 0.8213 |
| Zscore_PCC_RFE_18_AB      | 1 [nan-nan]            | 0      | 1      | 0.5038 | 1      | 1      | 1      | 1      | 1      | 1      | 1      |
| Zscore_PCC_RFE_18_DT      | 1 [nan-nan]            | 0      | 1      | 1      | 1      | 1      | 1      | 1      | 1      | 1      | 1      |
| Zscore_PCC_RFE_18_GP      | 0.9967 [0.9943-0.9992] | 0.0013 | 0.997  | 0.5266 | 0.9587 | 0.9792 | 1.027  | 0.9657 | 0.9926 | 0.9924 | 0.9666 |
| Zscore_PCC_RFE_18_NB      | 0.8227 [0.7946-0.8509] | 0.0144 | 0.8237 | 0.9895 | 0.5177 | 0.7561 | 1.1446 | 0.6838 | 0.8284 | 0.7994 | 0.7238 |
| Zscore_PCC_RFE_19_SVM     | 0.914 [0.8953-0.9328]  | 0.0096 | 0.9109 | 0.4812 | 0.6863 | 0.8431 | 0.9951 | 0.8456 | 0.8407 | 0.8415 | 0.8448 |
| Zscore_PCC_RFE_19_LDA     | 0.9141 [0.8959-0.9324] | 0.0093 | 0.9159 | 0.5781 | 0.6637 | 0.8297 | 1.1152 | 0.7721 | 0.8873 | 0.8726 | 0.7956 |



|                             |                        |        |        |        |        |        |        |        |        |        |        |
|-----------------------------|------------------------|--------|--------|--------|--------|--------|--------|--------|--------|--------|--------|
| Zscore_PCC_RFE_19_AE        | 0.8588 [0.8341-0.8835] | 0.0126 | 0.8576 | 0.4756 | 0.5686 | 0.7843 | 1      | 0.7843 | 0.7843 | 0.7843 | 0.7843 |
| Zscore_PCC_RFE_19_RF        | 1 [nan-nan]            | 0      | 1      | 0.66   | 1      | 1      | 1      | 1      | 1      | 1      | 1      |
| Zscore_PCC_RFE_19_LR        | 0.9038 [0.8840-0.9235] | 0.0101 | 0.8987 | 0.4816 | 0.6594 | 0.8297 | 0.9828 | 0.8382 | 0.8211 | 0.8241 | 0.8354 |
| Zscore_PCC_RFE_19_LRLasso   | 0.9073 [0.8880-0.9266] | 0.0098 | 0.9033 | 0.4323 | 0.6588 | 0.8272 | 0.8848 | 0.8848 | 0.7696 | 0.7934 | 0.8698 |
| Zscore_PCC_RFE_19_AB        | 1 [nan-nan]            | 0      | 1      | 0.5002 | 1      | 1      | 1      | 1      | 1      | 1      | 1      |
| Zscore_PCC_RFE_19_DT        | 1 [nan-nan]            | 0      | 1      | 1      | 1      | 1      | 1      | 1      | 1      | 1      | 1      |
| Zscore_PCC_RFE_19_GP        | 0.9986 [0.9974-0.9997] | 0.0006 | 0.9986 | 0.5229 | 0.9733 | 0.9865 | 1.0221 | 0.9755 | 0.9975 | 0.9975 | 0.976  |
| Zscore_PCC_RFE_19_NB        | 0.8199 [0.7916-0.8482] | 0.0144 | 0.8211 | 0.9899 | 0.4954 | 0.7463 | 1.1054 | 0.6936 | 0.799  | 0.7753 | 0.7228 |
| Zscore_PCC_RFE_20_SVM       | 0.9181 [0.8999-0.9364] | 0.0093 | 0.9138 | 0.4761 | 0.6939 | 0.8468 | 0.973  | 0.8603 | 0.8333 | 0.8377 | 0.8564 |
| Zscore_PCC_RFE_20_LDA       | 0.918 [0.9002-0.9358]  | 0.0091 | 0.9203 | 0.5814 | 0.6835 | 0.8395 | 1.1152 | 0.7819 | 0.8971 | 0.8837 | 0.8044 |
| Zscore_PCC_RFE_20_AE        | 0.8158 [0.7875-0.8441] | 0.0144 | 0.8182 | 0.5349 | 0.4726 | 0.7353 | 1.0931 | 0.6887 | 0.7819 | 0.7595 | 0.7152 |
| Zscore_PCC_RFE_20_RF        | 1 [nan-nan]            | 0      | 1      | 0.66   | 1      | 1      | 1      | 1      | 1      | 1      | 1      |
| Zscore_PCC_RFE_20_LR        | 0.906 [0.8865-0.9255]  | 0.0099 | 0.9003 | 0.4622 | 0.6596 | 0.8297 | 0.9681 | 0.8456 | 0.8137 | 0.8195 | 0.8405 |
| Zscore_PCC_RFE_20_LRLasso   | 0.9111 [0.8923-0.9299] | 0.0096 | 0.9068 | 0.4749 | 0.6745 | 0.837  | 0.9632 | 0.8554 | 0.8186 | 0.8251 | 0.8499 |
| Zscore_PCC_RFE_20_AB        | 1 [nan-nan]            | 0      | 1      | 0.5035 | 1      | 1      | 1      | 1      | 1      | 1      | 1      |
| Zscore_PCC_RFE_20_DT        | 1 [nan-nan]            | 0      | 1      | 1      | 1      | 1      | 1      | 1      | 1      | 1      | 1      |
| Zscore_PCC_RFE_20_GP        | 0.999 [0.9980-0.9999]  | 0.0005 | 0.999  | 0.5213 | 0.9781 | 0.989  | 1.0172 | 0.9804 | 0.9975 | 0.9975 | 0.9807 |
| Zscore_PCC_RFE_20_NB        | 0.8196 [0.7913-0.8479] | 0.0144 | 0.8198 | 0.9856 | 0.486  | 0.7426 | 1.0539 | 0.7157 | 0.7696 | 0.7565 | 0.7302 |
| Zscore_PCC_Relief_1_SVM     | 0.6277 [0.5898-0.6655] | 0.0193 | 0.621  | 0.5188 | 0.1888 | 0.5944 | 1.0319 | 0.5784 | 0.6103 | 0.5975 | 0.5914 |
| Zscore_PCC_Relief_1_LDA     | 0.6199 [0.5818-0.6580] | 0.0194 | 0.6156 | 0.5098 | 0.208  | 0.6029 | 0.8578 | 0.674  | 0.5319 | 0.5901 | 0.62   |
| Zscore_PCC_Relief_1_AE      | 0.5961 [0.5574-0.6347] | 0.0197 | 0.6031 | 0.5266 | 0.1504 | 0.5699 | 1.3701 | 0.3848 | 0.7549 | 0.6109 | 0.551  |
| Zscore_PCC_Relief_1_RF      | 1 [nan-nan]            | 0      | 1      | 0.555  | 1      | 1      | 1      | 1      | 1      | 1      | 1      |
| Zscore_PCC_Relief_1_LR      | 0.6336 [0.5958-0.6713] | 0.0193 | 0.6246 | 0.5103 | 0.1996 | 0.5993 | 0.8946 | 0.652  | 0.5466 | 0.5898 | 0.611  |
| Zscore_PCC_Relief_1_LRLasso | 0.6322 [0.5944-0.6700] | 0.0193 | 0.6235 | 0.5166 | 0.202  | 0.6005 | 0.902  | 0.6495 | 0.5515 | 0.5915 | 0.6114 |
| Zscore_PCC_Relief_1_AB      | 0.8902 [0.8692-0.9112] | 0.0107 | 0.8963 | 0.5001 | 0.5931 | 0.7966 | 0.9951 | 0.799  | 0.7941 | 0.7951 | 0.798  |
| Zscore_PCC_Relief_1_DT      | 1 [nan-nan]            | 0      | 1      | 1      | 1      | 1      | 1      | 1      | 1      | 1      | 1      |
| Zscore_PCC_Relief_1_GP      | 0.6401 [0.6026-0.6777] | 0.0192 | 0.6332 | 0.5035 | 0.2154 | 0.6029 | 0.7059 | 0.75   | 0.4559 | 0.5795 | 0.6458 |
| Zscore_PCC_Relief_1_NB      | 0.5619 [0.5225-0.6013] | 0.0201 | 0.5282 | 0.5912 | 0.1647 | 0.5711 | 0.4951 | 0.8235 | 0.3186 | 0.5472 | 0.6436 |
| Zscore_PCC_Relief_2_SVM     | 0.7165 [0.6818-0.7512] | 0.0177 | 0.7198 | 0.5185 | 0.3584 | 0.6789 | 1.0539 | 0.652  | 0.7059 | 0.6891 | 0.6698 |
| Zscore_PCC_Relief_2_LDA     | 0.705 [0.6698-0.7402]  | 0.018  | 0.706  | 0.519  | 0.3237 | 0.6618 | 1.0294 | 0.6471 | 0.6765 | 0.6667 | 0.6571 |
| Zscore_PCC_Relief_2_AE      | 0.624 [0.5859-0.6621]  | 0.0195 | 0.6573 | 0.4948 | 0.2573 | 0.6103 | 1.5147 | 0.3529 | 0.8676 | 0.7273 | 0.5728 |
| Zscore_PCC_Relief_2_RF      | 1 [nan-nan]            | 0      | 1      | 0.565  | 1      | 1      | 1      | 1      | 1      | 1      | 1      |
| Zscore_PCC_Relief_2_LR      | 0.7261 [0.6917-0.7604] | 0.0175 | 0.7308 | 0.5174 | 0.3555 | 0.6777 | 1.027  | 0.6642 | 0.6912 | 0.6826 | 0.673  |
| Zscore_PCC_Relief_2_LRLasso | 0.7259 [0.6916-0.7603] | 0.0175 | 0.7309 | 0.5294 | 0.3538 | 0.6765 | 1.0686 | 0.6422 | 0.7108 | 0.6895 | 0.6651 |
| Zscore_PCC_Relief_2_AB      | 0.948 [0.9350-0.9610]  | 0.0066 | 0.9505 | 0.4992 | 0.736  | 0.8676 | 0.9559 | 0.8897 | 0.8456 | 0.8521 | 0.8846 |
| Zscore_PCC_Relief_2_DT      | 1 [nan-nan]            | 0      | 1      | 1      | 1      | 1      | 1      | 1      | 1      | 1      | 1      |
| Zscore_PCC_Relief_2_GP      | 0.7406 [0.7070-0.7742] | 0.0171 | 0.7437 | 0.5161 | 0.3921 | 0.6936 | 1.1569 | 0.6152 | 0.7721 | 0.7297 | 0.6674 |
| Zscore_PCC_Relief_2_NB      | 0.591 [0.5522-0.6298]  | 0.0198 | 0.5702 | 0.8378 | 0.1374 | 0.5686 | 0.9559 | 0.5907 | 0.5466 | 0.5657 | 0.5718 |
| Zscore_PCC_Relief_3_SVM     | 0.7418 [0.7083-0.7752] | 0.0171 | 0.763  | 0.517  | 0.3806 | 0.69   | 1.0613 | 0.6593 | 0.7206 | 0.7023 | 0.679  |
| Zscore_PCC_Relief_3_LDA     | 0.7228 [0.6884-0.7572] | 0.0176 | 0.7471 | 0.5703 | 0.381  | 0.6789 | 1.3431 | 0.5074 | 0.8505 | 0.7724 | 0.6332 |
| Zscore_PCC_Relief_3_AE      | 0.5968 [0.5580-0.6355] | 0.0198 | 0.5685 | 0.4902 | 0.1735 | 0.5846 | 1.223  | 0.473  | 0.6961 | 0.6088 | 0.5691 |
| Zscore_PCC_Relief_3_RF      | 1 [nan-nan]            | 0      | 1      | 0.635  | 1      | 1      | 1      | 1      | 1      | 1      | 1      |
| Zscore_PCC_Relief_3_LR      | 0.7441 [0.7107-0.7775] | 0.017  | 0.7687 | 0.5568 | 0.3957 | 0.6924 | 1.2328 | 0.576  | 0.8088 | 0.7508 | 0.6561 |
| Zscore_PCC_Relief_3_LRLasso | 0.7444 [0.7110-0.7778] | 0.017  | 0.77   | 0.5357 | 0.3874 | 0.6924 | 1.1152 | 0.6348 | 0.75   | 0.7175 | 0.6725 |
| Zscore_PCC_Relief_3_AB      | 0.983 [0.9769-0.9891]  | 0.0031 | 0.9833 | 0.4983 | 0.8542 | 0.9265 | 0.9461 | 0.9534 | 0.8995 | 0.9047 | 0.9508 |
| Zscore_PCC_Relief_3_DT      | 1 [nan-nan]            | 0      | 1      | 1      | 1      | 1      | 1      | 1      | 1      | 1      | 1      |
| Zscore_PCC_Relief_3_GP      | 0.7699 [0.7379-0.8019] | 0.0163 | 0.7774 | 0.5173 | 0.4269 | 0.712  | 1.1152 | 0.6544 | 0.7696 | 0.7396 | 0.6901 |
| Zscore_PCC_Relief_3_NB      | 0.6288 [0.5908-0.6667] | 0.0194 | 0.6055 | 0.9769 | 0.2155 | 0.6066 | 1.1446 | 0.5343 | 0.6789 | 0.6246 | 0.5931 |
| Zscore_PCC_Relief_4_SVM     | 0.8015 [0.7722-0.8308] | 0.015  | 0.8103 | 0.5365 | 0.4508 | 0.7243 | 1.1005 | 0.674  | 0.7745 | 0.7493 | 0.7038 |
| Zscore_PCC_Relief_4_LDA     | 0.7837 [0.7530-0.8144] | 0.0157 | 0.794  | 0.5531 | 0.4346 | 0.7157 | 1.1225 | 0.6544 | 0.777  | 0.7458 | 0.6921 |
| Zscore_PCC_Relief_4_AE      | 0.7394 [0.7061-0.7726] | 0.017  | 0.7496 | 0.4901 | 0.343  | 0.6703 | 1.1152 | 0.6127 | 0.7279 | 0.6925 | 0.6527 |
| Zscore_PCC_Relief_4_RF      | 1 [nan-nan]            | 0      | 1      | 0.595  | 1      | 1      | 1      | 1      | 1      | 1      | 1      |
| Zscore_PCC_Relief_4_LR      | 0.8003 [0.7709-0.8296] | 0.015  | 0.8104 | 0.5955 | 0.4528 | 0.7206 | 1.2255 | 0.6078 | 0.8333 | 0.7848 | 0.68   |
| Zscore_PCC_Relief_4_LRLasso | 0.8043 [0.7752-0.8335] | 0.0149 | 0.8134 | 0.5674 | 0.4563 | 0.7255 | 1.152  | 0.6495 | 0.8015 | 0.7659 | 0.6957 |
| Zscore_PCC_Relief_4_AB      | 0.9895 [0.9852-0.9938] | 0.0022 | 0.9896 | 0.4995 | 0.8824 | 0.9412 | 0.9951 | 0.9436 | 0.9387 | 0.939  | 0.9433 |
| Zscore_PCC_Relief_4_DT      | 1 [nan-nan]            | 0      | 1      | 1      | 1      | 1      | 1      | 1      | 1      | 1      | 1      |
| Zscore_PCC_Relief_4_GP      | 0.8321 [0.8046-0.8597] | 0.0141 | 0.8359 | 0.5136 | 0.5449 | 0.7721 | 1.0539 | 0.7451 | 0.799  | 0.7876 | 0.7581 |
| Zscore_PCC_Relief_4_NB      | 0.6458 [0.6085-0.6831] | 0.019  | 0.6436 | 0.9837 | 0.1963 | 0.598  | 1.049  | 0.5735 | 0.6225 | 0.6031 | 0.5935 |
| Zscore_PCC_Relief_5_SVM     | 0.8252 [0.7976-0.8528] | 0.0141 | 0.8286 | 0.5221 | 0.5027 | 0.7512 | 1.0319 | 0.7353 | 0.7672 | 0.7595 | 0.7435 |
| Zscore_PCC_Relief_5_LDA     | 0.8015 [0.7721-0.8309] | 0.015  | 0.8053 | 0.5554 | 0.4464 | 0.7218 | 1.1103 | 0.6667 | 0.777  | 0.7493 | 0.6998 |
| Zscore_PCC_Relief_5_AE      | 0.6827 [0.6465-0.7190] | 0.0185 | 0.6703 | 0.493  | 0.2794 | 0.6397 | 1.0049 | 0.6373 | 0.6422 | 0.6404 | 0.639  |
| Zscore_PCC_Relief_5_RF      | 1 [nan-nan]            | 0      | 1      | 0.57   | 1      | 1      | 1      | 1      | 1      | 1      | 1      |
| Zscore_PCC_Relief_5_LR      | 0.8237 [0.7961-0.8513] | 0.0141 | 0.8283 | 0.4881 | 0.4912 | 0.7451 | 0.9363 | 0.777  | 0.7132 | 0.7304 | 0.7618 |
| Zscore_PCC_Relief_5_LRLasso | 0.8248 [0.7972-0.8523] | 0.014  | 0.8288 | 0.4999 | 0.4983 | 0.7488 | 0.9436 | 0.777  | 0.7206 | 0.7355 | 0.7636 |
| Zscore_PCC_Relief_5_AB      | 0.9944 [0.9917-0.9972] | 0.0014 | 0.9945 | 0.4995 | 0.9216 | 0.9608 | 1.0049 | 0.9583 | 0.9632 | 0.9631 | 0.9585 |
| Zscore_PCC_Relief_5_DT      | 1 [nan-nan]            | 0      | 1      | 1      | 1      | 1      | 1      | 1      | 1      | 1      | 1      |
| Zscore_PCC_Relief_5_GP      | 0.853 [0.8272-0.8789]  | 0.0132 | 0.8554 | 0.4767 | 0.5732 | 0.7855 | 0.9142 | 0.8284 | 0.7426 | 0.763  | 0.8123 |
| Zscore_PCC_Relief_5_NB      | 0.6244 [0.5864-0.6625] | 0.0194 | 0.6138 | 0.9608 | 0.22   | 0.6005 | 0.5931 | 0.8039 | 0.3971 | 0.5714 | 0.6694 |
| Zscore_PCC_Relief_6_SVM     | 0.8463 [0.8205-0.8721] | 0.0132 | 0.8453 | 0.4765 | 0.5402 | 0.7696 | 0.9412 | 0.799  | 0.7402 | 0.7546 | 0.7865 |
| Zscore_PCC_Relief_6_LDA     | 0.8238 [0.7961-0.8516] | 0.0142 | 0.821  | 0.5539 | 0.4898 | 0.7439 | 1.0907 | 0.6985 | 0.7892 | 0.7682 | 0.7236 |
| Zscore_PCC_Relief_6_AE      | 0.7214 [0.6869-0.7558] | 0.0176 | 0.739  | 0.5117 | 0.3519 | 0.674  | 1.1471 | 0.6005 | 0.7475 | 0.704  | 0.6517 |
| Zscore_PCC_Relief_6_RF      | 1 [nan-nan]            | 0      | 1      | 0.6    | 1      | 1      | 1      | 1      | 1      | 1      | 1      |
| Zscore_PCC_Relief_6_LR      | 0.8453 [0.8196-0.8711] | 0.0131 | 0.8463 | 0.5494 | 0.531  | 0.7647 | 1.0784 | 0.7255 | 0.8039 | 0.7872 | 0.7455 |



|                              |                        |        |        |        |        |        |        |        |        |        |        |
|------------------------------|------------------------|--------|--------|--------|--------|--------|--------|--------|--------|--------|--------|
| Zscore_PCC_Relief_13_GP      | 0.9578 [0.9450-0.9707] | 0.0066 | 0.9614 | 0.5123 | 0.809  | 0.9044 | 1.0196 | 0.8946 | 0.9142 | 0.9125 | 0.8966 |
| Zscore_PCC_Relief_13_NB      | 0.6653 [0.6286-0.7021] | 0.0188 | 0.6425 | 0.9993 | 0.2612 | 0.6189 | 0.5858 | 0.826  | 0.4118 | 0.5841 | 0.7029 |
| Zscore_PCC_Relief_14_SVM     | 0.8894 [0.8676-0.9112] | 0.0111 | 0.8844 | 0.4774 | 0.6281 | 0.8137 | 0.9559 | 0.8358 | 0.7917 | 0.8005 | 0.8282 |
| Zscore_PCC_Relief_14_LDA     | 0.8853 [0.8631-0.9075] | 0.0113 | 0.8805 | 0.5208 | 0.6236 | 0.8113 | 1.0588 | 0.7819 | 0.8407 | 0.8307 | 0.794  |
| Zscore_PCC_Relief_14_AE      | 0.6798 [0.6432-0.7163] | 0.0186 | 0.6127 | 0.6455 | 0.2684 | 0.6336 | 1.0956 | 0.5858 | 0.6814 | 0.6477 | 0.6219 |
| Zscore_PCC_Relief_14_RF      | 1 [nan-nan]            | 0      | 1      | 0.65   | 1      | 1      | 1      | 1      | 1      | 1      | 1      |
| Zscore_PCC_Relief_14_LR      | 0.8745 [0.8514-0.8975] | 0.0118 | 0.8727 | 0.5224 | 0.5959 | 0.7978 | 1.0319 | 0.7819 | 0.8137 | 0.8076 | 0.7886 |
| Zscore_PCC_Relief_14_LRLasso | 0.8877 [0.8661-0.9093] | 0.011  | 0.8844 | 0.4954 | 0.6257 | 0.8125 | 0.9534 | 0.8358 | 0.7892 | 0.7986 | 0.8278 |
| Zscore_PCC_Relief_14_AB      | 1 [nan-nan]            | 0      | 1      | 0.5012 | 1      | 1      | 1      | 1      | 1      | 1      | 1      |
| Zscore_PCC_Relief_14_DT      | 1 [nan-nan]            | 0      | 1      | 1      | 1      | 1      | 1      | 1      | 1      | 1      | 1      |
| Zscore_PCC_Relief_14_GP      | 0.9666 [0.9550-0.9781] | 0.0059 | 0.9701 | 0.5118 | 0.831  | 0.9154 | 1.0172 | 0.9069 | 0.924  | 0.9227 | 0.9084 |
| Zscore_PCC_Relief_14_NB      | 0.6595 [0.6223-0.6968] | 0.019  | 0.6185 | 0.9999 | 0.2706 | 0.6336 | 0.8407 | 0.7132 | 0.5539 | 0.6152 | 0.6589 |
| Zscore_PCC_Relief_15_SVM     | 0.8928 [0.8715-0.9142] | 0.0109 | 0.8855 | 0.4917 | 0.6377 | 0.8186 | 0.9608 | 0.8382 | 0.799  | 0.8066 | 0.8316 |
| Zscore_PCC_Relief_15_LDA     | 0.8905 [0.8691-0.9120] | 0.0109 | 0.8849 | 0.5141 | 0.6202 | 0.81   | 1.0172 | 0.8015 | 0.8186 | 0.8155 | 0.8048 |
| Zscore_PCC_Relief_15_AE      | 0.6738 [0.6370-0.7106] | 0.0188 | 0.6102 | 0.5203 | 0.3021 | 0.6446 | 0.7108 | 0.7892 | 0.5    | 0.6122 | 0.7034 |
| Zscore_PCC_Relief_15_RF      | 1 [nan-nan]            | 0      | 1      | 0.635  | 1      | 1      | 1      | 1      | 1      | 1      | 1      |
| Zscore_PCC_Relief_15_LR      | 0.8775 [0.8548-0.9002] | 0.0116 | 0.8743 | 0.5126 | 0.5933 | 0.7966 | 1.0245 | 0.7843 | 0.8088 | 0.804  | 0.7895 |
| Zscore_PCC_Relief_15_LRLasso | 0.8915 [0.8704-0.9126] | 0.0108 | 0.8873 | 0.5016 | 0.6181 | 0.8088 | 0.9608 | 0.8284 | 0.7892 | 0.7972 | 0.8214 |
| Zscore_PCC_Relief_15_AB      | 1 [nan-nan]            | 0      | 1      | 0.5012 | 1      | 1      | 1      | 1      | 1      | 1      | 1      |
| Zscore_PCC_Relief_15_DT      | 1 [nan-nan]            | 0      | 1      | 1      | 1      | 1      | 1      | 1      | 1      | 1      | 1      |
| Zscore_PCC_Relief_15_GP      | 0.9769 [0.9687-0.9852] | 0.0042 | 0.9784 | 0.5118 | 0.8505 | 0.9252 | 1.0025 | 0.924  | 0.9265 | 0.9263 | 0.9242 |
| Zscore_PCC_Relief_15_NB      | 0.6628 [0.6257-0.6998] | 0.0189 | 0.6227 | 0.9999 | 0.2891 | 0.6409 | 0.777  | 0.7525 | 0.5294 | 0.6152 | 0.6814 |
| Zscore_PCC_Relief_16_SVM     | 0.8961 [0.8753-0.9170] | 0.0106 | 0.8939 | 0.5125 | 0.6422 | 0.8211 | 0.9853 | 0.8284 | 0.8137 | 0.8164 | 0.8259 |
| Zscore_PCC_Relief_16_LDA     | 0.8933 [0.8723-0.9142] | 0.0107 | 0.8922 | 0.4959 | 0.6226 | 0.8113 | 0.9853 | 0.8186 | 0.8039 | 0.8068 | 0.8159 |
| Zscore_PCC_Relief_16_AE      | 0.8034 [0.7741-0.8326] | 0.0149 | 0.7959 | 0.48   | 0.4654 | 0.7292 | 0.826  | 0.8162 | 0.6422 | 0.6952 | 0.7774 |
| Zscore_PCC_Relief_16_RF      | 1 [nan-nan]            | 0      | 1      | 0.625  | 1      | 1      | 1      | 1      | 1      | 1      | 1      |
| Zscore_PCC_Relief_16_LR      | 0.8804 [0.8581-0.9026] | 0.0114 | 0.8809 | 0.4404 | 0.6056 | 0.8002 | 0.8701 | 0.8652 | 0.7353 | 0.7657 | 0.8451 |
| Zscore_PCC_Relief_16_LRLasso | 0.8945 [0.8739-0.9152] | 0.0105 | 0.8936 | 0.5025 | 0.6154 | 0.8076 | 0.973  | 0.8211 | 0.7941 | 0.7995 | 0.8161 |
| Zscore_PCC_Relief_16_AB      | 1 [nan-nan]            | 0      | 1      | 0.5015 | 1      | 1      | 1      | 1      | 1      | 1      | 1      |
| Zscore_PCC_Relief_16_DT      | 1 [nan-nan]            | 0      | 1      | 1      | 1      | 1      | 1      | 1      | 1      | 1      | 1      |
| Zscore_PCC_Relief_16_GP      | 0.9844 [0.9775-0.9913] | 0.0035 | 0.9865 | 0.5223 | 0.8879 | 0.9436 | 1.0392 | 0.924  | 0.9632 | 0.9617 | 0.9269 |
| Zscore_PCC_Relief_16_NB      | 0.661 [0.6239-0.6981]  | 0.0189 | 0.6217 | 1      | 0.2768 | 0.636  | 0.8162 | 0.7279 | 0.5441 | 0.6149 | 0.6667 |
| Zscore_PCC_Relief_17_SVM     | 0.8995 [0.8790-0.9200] | 0.0105 | 0.8964 | 0.4916 | 0.6429 | 0.8211 | 0.951  | 0.8456 | 0.7966 | 0.8061 | 0.8376 |
| Zscore_PCC_Relief_17_LDA     | 0.8978 [0.8774-0.9182] | 0.0104 | 0.8971 | 0.5123 | 0.6348 | 0.8174 | 1.0074 | 0.8137 | 0.8211 | 0.8198 | 0.8151 |
| Zscore_PCC_Relief_17_AE      | 0.7249 [0.6906-0.7593] | 0.0175 | 0.6699 | 0.5471 | 0.3382 | 0.6691 | 0.9951 | 0.6716 | 0.6667 | 0.6683 | 0.67   |
| Zscore_PCC_Relief_17_RF      | 1 [nan-nan]            | 0      | 1      | 0.63   | 1      | 1      | 1      | 1      | 1      | 1      | 1      |
| Zscore_PCC_Relief_17_LR      | 0.8786 [0.8561-0.9011] | 0.0115 | 0.8782 | 0.486  | 0.6082 | 0.8039 | 0.9657 | 0.8211 | 0.7868 | 0.7938 | 0.8147 |
| Zscore_PCC_Relief_17_LRLasso | 0.8955 [0.8749-0.9160] | 0.0105 | 0.8941 | 0.4509 | 0.6322 | 0.8137 | 0.8775 | 0.875  | 0.7525 | 0.7795 | 0.8575 |
| Zscore_PCC_Relief_17_AB      | 1 [nan-nan]            | 0      | 1      | 0.5017 | 1      | 1      | 1      | 1      | 1      | 1      | 1      |
| Zscore_PCC_Relief_17_DT      | 1 [nan-nan]            | 0      | 1      | 1      | 1      | 1      | 1      | 1      | 1      | 1      | 1      |
| Zscore_PCC_Relief_17_GP      | 0.9874 [0.9811-0.9936] | 0.0032 | 0.9892 | 0.5232 | 0.9052 | 0.9522 | 1.0417 | 0.9314 | 0.973  | 0.9719 | 0.9341 |
| Zscore_PCC_Relief_17_NB      | 0.6594 [0.6221-0.6967] | 0.019  | 0.6139 | 1      | 0.2952 | 0.6458 | 0.8456 | 0.723  | 0.5686 | 0.6263 | 0.6725 |
| Zscore_PCC_Relief_18_SVM     | 0.9011 [0.8809-0.9213] | 0.0103 | 0.8967 | 0.4899 | 0.6551 | 0.8272 | 0.9534 | 0.8505 | 0.8039 | 0.8126 | 0.8432 |
| Zscore_PCC_Relief_18_LDA     | 0.9009 [0.8809-0.9209] | 0.0102 | 0.8997 | 0.4578 | 0.6431 | 0.8211 | 0.9461 | 0.848  | 0.7941 | 0.8047 | 0.8394 |
| Zscore_PCC_Relief_18_AE      | 0.7587 [0.7265-0.7908] | 0.0164 | 0.7546 | 0.5031 | 0.3861 | 0.69   | 0.8211 | 0.7794 | 0.6005 | 0.6611 | 0.7313 |
| Zscore_PCC_Relief_18_RF      | 1 [nan-nan]            | 0      | 1      | 0.635  | 1      | 1      | 1      | 1      | 1      | 1      | 1      |
| Zscore_PCC_Relief_18_LR      | 0.8784 [0.8558-0.9010] | 0.0115 | 0.8779 | 0.5024 | 0.6153 | 0.8076 | 0.9828 | 0.8162 | 0.799  | 0.8024 | 0.813  |
| Zscore_PCC_Relief_18_LRLasso | 0.8963 [0.8758-0.9168] | 0.0105 | 0.8942 | 0.4494 | 0.6402 | 0.8174 | 0.8701 | 0.8824 | 0.7525 | 0.7809 | 0.8648 |
| Zscore_PCC_Relief_18_AB      | 1 [nan-nan]            | 0      | 1      | 0.5034 | 1      | 1      | 1      | 1      | 1      | 1      | 1      |
| Zscore_PCC_Relief_18_DT      | 1 [nan-nan]            | 0      | 1      | 1      | 1      | 1      | 1      | 1      | 1      | 1      | 1      |
| Zscore_PCC_Relief_18_GP      | 0.9915 [0.9861-0.9969] | 0.0027 | 0.9932 | 0.5131 | 0.9338 | 0.9669 | 1.0074 | 0.9632 | 0.9706 | 0.9704 | 0.9635 |
| Zscore_PCC_Relief_18_NB      | 0.6566 [0.6192-0.6940] | 0.0191 | 0.6103 | 1      | 0.2834 | 0.6409 | 0.8946 | 0.6936 | 0.5882 | 0.6275 | 0.6575 |
| Zscore_PCC_Relief_19_SVM     | 0.9042 [0.8844-0.9240] | 0.0101 | 0.9013 | 0.4741 | 0.6514 | 0.8248 | 0.924  | 0.8627 | 0.7868 | 0.8018 | 0.8515 |
| Zscore_PCC_Relief_19_LDA     | 0.9037 [0.8841-0.9232] | 0.01   | 0.9037 | 0.4859 | 0.6422 | 0.8211 | 0.9902 | 0.826  | 0.8162 | 0.818  | 0.8243 |
| Zscore_PCC_Relief_19_AE      | 0.7756 [0.7443-0.8069] | 0.016  | 0.7581 | 0.4584 | 0.426  | 0.7096 | 0.8211 | 0.799  | 0.6201 | 0.6778 | 0.7552 |
| Zscore_PCC_Relief_19_RF      | 1 [nan-nan]            | 0      | 1      | 0.67   | 1      | 1      | 1      | 1      | 1      | 1      | 1      |
| Zscore_PCC_Relief_19_LR      | 0.8823 [0.8602-0.9044] | 0.0113 | 0.8821 | 0.507  | 0.6128 | 0.8064 | 0.9951 | 0.8088 | 0.8039 | 0.8049 | 0.8079 |
| Zscore_PCC_Relief_19_LRLasso | 0.901 [0.8811-0.9208]  | 0.0101 | 0.9007 | 0.4468 | 0.6456 | 0.8211 | 0.8971 | 0.8725 | 0.7696 | 0.7911 | 0.8579 |
| Zscore_PCC_Relief_19_AB      | 1 [nan-nan]            | 0      | 1      | 0.5047 | 1      | 1      | 1      | 1      | 1      | 1      | 1      |
| Zscore_PCC_Relief_19_DT      | 1 [nan-nan]            | 0      | 1      | 1      | 1      | 1      | 1      | 1      | 1      | 1      | 1      |
| Zscore_PCC_Relief_19_GP      | 0.9949 [0.9910-0.9989] | 0.002  | 0.9959 | 0.5137 | 0.951  | 0.9755 | 1.0098 | 0.9706 | 0.9804 | 0.9802 | 0.9709 |
| Zscore_PCC_Relief_19_NB      | 0.6547 [0.6172-0.6921] | 0.0191 | 0.6077 | 1      | 0.2801 | 0.6397 | 0.9314 | 0.674  | 0.6054 | 0.6307 | 0.65   |
| Zscore_PCC_Relief_20_SVM     | 0.9039 [0.8839-0.9240] | 0.0102 | 0.9013 | 0.5578 | 0.6556 | 0.8272 | 1.0613 | 0.7966 | 0.8578 | 0.8486 | 0.8083 |
| Zscore_PCC_Relief_20_LDA     | 0.9063 [0.8870-0.9256] | 0.0098 | 0.9063 | 0.5526 | 0.6462 | 0.8223 | 1.0711 | 0.7868 | 0.8578 | 0.847  | 0.8009 |
| Zscore_PCC_Relief_20_AE      | 0.7494 [0.7164-0.7824] | 0.0168 | 0.7267 | 0.5069 | 0.3895 | 0.6936 | 0.8922 | 0.7475 | 0.6397 | 0.6748 | 0.717  |
| Zscore_PCC_Relief_20_RF      | 1 [nan-nan]            | 0      | 1      | 0.65   | 1      | 1      | 1      | 1      | 1      | 1      | 1      |
| Zscore_PCC_Relief_20_LR      | 0.8831 [0.8610-0.9052] | 0.0113 | 0.8828 | 0.4705 | 0.6201 | 0.8088 | 0.9118 | 0.8529 | 0.7647 | 0.7838 | 0.8387 |
| Zscore_PCC_Relief_20_LRLasso | 0.9023 [0.8826-0.9220] | 0.01   | 0.9022 | 0.4695 | 0.6522 | 0.8248 | 0.9093 | 0.8701 | 0.7794 | 0.7978 | 0.8571 |
| Zscore_PCC_Relief_20_AB      | 1 [nan-nan]            | 0      | 1      | 0.5034 | 1      | 1      | 1      | 1      | 1      | 1      | 1      |
| Zscore_PCC_Relief_20_DT      | 1 [nan-nan]            | 0      | 1      | 1      | 1      | 1      | 1      | 1      | 1      | 1      | 1      |
| Zscore_PCC_Relief_20_GP      | 0.9957 [0.9918-0.9997] | 0.002  | 0.9967 | 0.5171 | 0.9611 | 0.9804 | 1.0245 | 0.9681 | 0.9926 | 0.9925 | 0.9689 |
| Zscore_PCC_Relief_20_NB      | 0.6473 [0.6096-0.6850] | 0.0192 | 0.6027 | 1      | 0.2647 | 0.6311 | 0.8652 | 0.6985 | 0.5637 | 0.6156 | 0.6516 |
