# Supplementary material for: A more objective PD diagnostic model: integrating texture feature markers of cerebellar gray matter and white matter through machine learning
Source: PubMed Central journal article supplement (PMC11190310; doi:10.3389/fnagi.2024.1393841), 2024-06-07
Supplement: Data_Sheet_3.pdf [file Data_Sheet_3.pdf]

**Validation results**

|                            | AUC    | 95% CIs         | Std    | AUC-PR | Cutoff | MCC    | Acc    | Youden Index | Sen    | Spe    | PPV    | NPV    |
|----------------------------|--------|-----------------|--------|--------|--------|--------|--------|--------------|--------|--------|--------|--------|
| Zscore_PCC_ANOVA_1_SVM     | 0.5969 | [0.5183-0.6754] | 0.0401 | 0.583  | 0.5772 | 0.2135 | 0.6029 | 1.2647       | 0.4706 | 0.7353 | 0.64   | 0.5814 |
| Zscore_PCC_ANOVA_1_LDA     | 0.5956 | [0.5169-0.6744] | 0.0402 | 0.584  | 0.5784 | 0.2326 | 0.6127 | 1.2451       | 0.4902 | 0.7353 | 0.6494 | 0.5906 |
| Zscore_PCC_ANOVA_1_AE      | 0.5807 | [0.5013-0.6602] | 0.0405 | 0.5549 | 0.539  | 0.2338 | 0.6127 | 1.2647       | 0.4804 | 0.7451 | 0.6533 | 0.5891 |
| Zscore_PCC_ANOVA_1_RF      | 0.5208 | [0.4411-0.6005] | 0.0407 | 0.5424 | 0.09   | 0.0925 | 0.5392 | 0.4706       | 0.8039 | 0.2745 | 0.5256 | 0.5833 |
| Zscore_PCC_ANOVA_1_LR      | 0.5964 | [0.5178-0.6750] | 0.0401 | 0.5787 | 0.5873 | 0.2231 | 0.6078 | 1.2549       | 0.4804 | 0.7353 | 0.6447 | 0.5859 |
| Zscore_PCC_ANOVA_1_LRLasso | 0.5969 | [0.5184-0.6754] | 0.0401 | 0.579  | 0.5906 | 0.2231 | 0.6078 | 1.2549       | 0.4804 | 0.7353 | 0.6447 | 0.5859 |
| Zscore_PCC_ANOVA_1_AB      | 0.5322 | [0.4525-0.6119] | 0.0406 | 0.5485 | 0.5033 | 0.1257 | 0.5588 | 1.3529       | 0.3824 | 0.7353 | 0.5909 | 0.5435 |
| Zscore_PCC_ANOVA_1_DT      | 0.4853 | [0.4164-0.5542] | 0.0352 | 0.6153 | 2      | 0      | 0.5    | 2            | 0      | 1      | 0      | 0.5    |
| Zscore_PCC_ANOVA_1_GP      | 0.5863 | [0.5069-0.6657] | 0.0405 | 0.5541 | 0.5875 | 0.2433 | 0.6176 | 1.2549       | 0.4902 | 0.7451 | 0.6579 | 0.5938 |
| Zscore_PCC_ANOVA_1_NB      | 0.5586 | [0.4788-0.6384] | 0.0407 | 0.5364 | 0.5498 | 0.1711 | 0.5833 | 0.7745       | 0.6961 | 0.4706 | 0.568  | 0.6076 |
| Zscore_PCC_ANOVA_2_SVM     | 0.6935 | [0.6215-0.7655] | 0.0367 | 0.6952 | 0.3813 | 0.3419 | 0.6618 | 0.6765       | 0.8235 | 0.5    | 0.6222 | 0.7391 |
| Zscore_PCC_ANOVA_2_LDA     | 0.6696 | [0.5952-0.7439] | 0.0379 | 0.6368 | 0.4585 | 0.312  | 0.6471 | 0.6667       | 0.8137 | 0.4804 | 0.6103 | 0.7206 |
| Zscore_PCC_ANOVA_2_AE      | 0.6794 | [0.6062-0.7525] | 0.0373 | 0.6694 | 0.4553 | 0.2948 | 0.6422 | 0.7353       | 0.7745 | 0.5098 | 0.6124 | 0.6933 |
| Zscore_PCC_ANOVA_2_RF      | 0.6621 | [0.5876-0.7366] | 0.038  | 0.6642 | 0.585  | 0.295  | 0.6471 | 1.0784       | 0.6078 | 0.6863 | 0.6596 | 0.6364 |
| Zscore_PCC_ANOVA_2_LR      | 0.6875 | [0.6152-0.7599] | 0.0369 | 0.6939 | 0.6372 | 0.2948 | 0.6422 | 1.2647       | 0.5098 | 0.7745 | 0.6933 | 0.6124 |
| Zscore_PCC_ANOVA_2_LRLasso | 0.6865 | [0.6140-0.7590] | 0.037  | 0.6898 | 0.6419 | 0.2948 | 0.6422 | 1.2647       | 0.5098 | 0.7745 | 0.6933 | 0.6124 |
| Zscore_PCC_ANOVA_2_AB      | 0.6318 | [0.5557-0.7079] | 0.0388 | 0.6229 | 0.4944 | 0.2383 | 0.6127 | 0.6765       | 0.7745 | 0.451  | 0.5852 | 0.6667 |
| Zscore_PCC_ANOVA_2_DT      | 0.549  | [0.4805-0.6175] | 0.0349 | 0.6678 | 1      | 0.0982 | 0.549  | 0.9412       | 0.5784 | 0.5196 | 0.5463 | 0.5521 |
| Zscore_PCC_ANOVA_2_GP      | 0.6788 | [0.6052-0.7524] | 0.0376 | 0.6584 | 0.5823 | 0.3199 | 0.6569 | 1.1961       | 0.5588 | 0.7549 | 0.6951 | 0.6311 |
| Zscore_PCC_ANOVA_2_NB      | 0.6454 | [0.5692-0.7217] | 0.0389 | 0.6075 | 0.7452 | 0.2894 | 0.6422 | 1.1863       | 0.549  | 0.7353 | 0.6747 | 0.6198 |
| Zscore_PCC_ANOVA_3_SVM     | 0.7198 | [0.6502-0.7895] | 0.0355 | 0.7298 | 0.6444 | 0.3653 | 0.6716 | 1.3431       | 0.5    | 0.8431 | 0.7612 | 0.6277 |
| Zscore_PCC_ANOVA_3_LDA     | 0.7034 | [0.6318-0.7750] | 0.0365 | 0.7019 | 0.6055 | 0.3506 | 0.6716 | 1.2059       | 0.5686 | 0.7745 | 0.716  | 0.6423 |
| Zscore_PCC_ANOVA_3_AE      | 0.7009 | [0.6287-0.7731] | 0.0368 | 0.7149 | 0.4782 | 0.3772 | 0.6863 | 0.8431       | 0.7647 | 0.6078 | 0.661  | 0.7209 |
| Zscore_PCC_ANOVA_3_RF      | 0.7061 | [0.6346-0.7776] | 0.0365 | 0.7086 | 0.645  | 0.3907 | 0.6912 | 1.2059       | 0.5882 | 0.7941 | 0.7407 | 0.6585 |
| Zscore_PCC_ANOVA_3_LR      | 0.7223 | [0.6530-0.7917] | 0.0354 | 0.7347 | 0.6109 | 0.3762 | 0.6814 | 1.2647       | 0.549  | 0.8137 | 0.7467 | 0.6434 |
| Zscore_PCC_ANOVA_3_LRLasso | 0.7222 | [0.6529-0.7916] | 0.0354 | 0.7333 | 0.636  | 0.3693 | 0.6765 | 1.2941       | 0.5294 | 0.8235 | 0.75   | 0.6364 |
| Zscore_PCC_ANOVA_3_AB      | 0.6475 | [0.5723-0.7228] | 0.0384 | 0.6388 | 0.4931 | 0.2724 | 0.6275 | 0.6471       | 0.8039 | 0.451  | 0.5942 | 0.697  |
| Zscore_PCC_ANOVA_3_DT      | 0.5882 | [0.5207-0.6558] | 0.0345 | 0.6995 | 1      | 0.1773 | 0.5882 | 0.902        | 0.6373 | 0.5392 | 0.5804 | 0.5978 |
| Zscore_PCC_ANOVA_3_GP      | 0.7441 | [0.6767-0.8116] | 0.0344 | 0.7464 | 0.5313 | 0.413  | 0.7059 | 1.0784       | 0.6667 | 0.7451 | 0.7234 | 0.6909 |
| Zscore_PCC_ANOVA_3_NB      | 0.6988 | [0.6262-0.7713] | 0.037  | 0.6809 | 0.7342 | 0.353  | 0.6765 | 0.9804       | 0.6863 | 0.6667 | 0.6731 | 0.68   |
| Zscore_PCC_ANOVA_4_SVM     | 0.7687 | [0.7041-0.8333] | 0.0329 | 0.7728 | 0.4598 | 0.4417 | 0.7206 | 0.951        | 0.7451 | 0.6961 | 0.7103 | 0.732  |
| Zscore_PCC_ANOVA_4_LDA     | 0.7518 | [0.6846-0.8191] | 0.0343 | 0.7508 | 0.5445 | 0.4619 | 0.7304 | 1.0686       | 0.6961 | 0.7647 | 0.7474 | 0.7156 |
| Zscore_PCC_ANOVA_4_AE      | 0.609  | [0.5307-0.6873] | 0.0399 | 0.6053 | 0.48   | 0.2891 | 0.6373 | 1.3137       | 0.4804 | 0.7941 | 0.7    | 0.6045 |
| Zscore_PCC_ANOVA_4_RF      | 0.7302 | [0.6618-0.7986] | 0.0349 | 0.7254 | 0.72   | 0.3772 | 0.6765 | 1.3529       | 0.5    | 0.8529 | 0.7727 | 0.6304 |
| Zscore_PCC_ANOVA_4_LR      | 0.7674 | [0.7027-0.8321] | 0.033  | 0.7709 | 0.5133 | 0.4317 | 0.7157 | 1.0392       | 0.6961 | 0.7353 | 0.7245 | 0.7075 |
| Zscore_PCC_ANOVA_4_LRLasso | 0.7636 | [0.6984-0.8287] | 0.0333 | 0.7688 | 0.4998 | 0.4314 | 0.7157 | 1            | 0.7157 | 0.7157 | 0.7157 | 0.7157 |
| Zscore_PCC_ANOVA_4_AB      | 0.7014 | [0.6303-0.7725] | 0.0363 | 0.6966 | 0.499  | 0.3357 | 0.6667 | 0.8824       | 0.7255 | 0.6078 | 0.6491 | 0.6889 |
| Zscore_PCC_ANOVA_4_DT      | 0.6176 | [0.5510-0.6843] | 0.034  | 0.7074 | 1      | 0.2364 | 0.6176 | 1.098        | 0.5686 | 0.6667 | 0.6304 | 0.6071 |
| Zscore_PCC_ANOVA_4_GP      | 0.7651 | [0.6993-0.8309] | 0.0336 | 0.7561 | 0.539  | 0.4832 | 0.7402 | 1.1078       | 0.6863 | 0.7941 | 0.7692 | 0.7168 |
| Zscore_PCC_ANOVA_4_NB      | 0.6995 | [0.6267-0.7724] | 0.0372 | 0.6683 | 0.8776 | 0.4169 | 0.7059 | 1.1569       | 0.6275 | 0.7843 | 0.7442 | 0.678  |
| Zscore_PCC_ANOVA_5_SVM     | 0.8071 | [0.7483-0.8659] | 0.03   | 0.8194 | 0.5556 | 0.5055 | 0.75   | 1.1471       | 0.6765 | 0.8235 | 0.7931 | 0.7179 |
| Zscore_PCC_ANOVA_5_LDA     | 0.8236 | [0.7665-0.8808] | 0.0291 | 0.8336 | 0.4884 | 0.5494 | 0.7745 | 1.0392       | 0.7549 | 0.7941 | 0.7857 | 0.7642 |
| Zscore_PCC_ANOVA_5_AE      | 0.7398 | [0.6729-0.8067] | 0.0341 | 0.748  | 0.4525 | 0.3951 | 0.6863 | 0.6667       | 0.8529 | 0.5196 | 0.6397 | 0.7794 |
| Zscore_PCC_ANOVA_5_RF      | 0.7675 | [0.7031-0.8320] | 0.0329 | 0.7734 | 0.655  | 0.4348 | 0.7108 | 1.2451       | 0.5882 | 0.8333 | 0.7792 | 0.6693 |
| Zscore_PCC_ANOVA_5_LR      | 0.817  | [0.7597-0.8743] | 0.0292 | 0.8265 | 0.4197 | 0.5099 | 0.7549 | 0.9804       | 0.7647 | 0.7451 | 0.75   | 0.76   |
| Zscore_PCC_ANOVA_5_LRLasso | 0.8175 | [0.7600-0.8750] | 0.0293 | 0.8287 | 0.4425 | 0.5098 | 0.7549 | 1            | 0.7549 | 0.7549 | 0.7549 | 0.7549 |
| Zscore_PCC_ANOVA_5_AB      | 0.7159 | [0.6460-0.7858] | 0.0357 | 0.7159 | 0.4966 | 0.3563 | 0.6765 | 0.8627       | 0.7451 | 0.6078 | 0.6552 | 0.7045 |
| Zscore_PCC_ANOVA_5_DT      | 0.6422 | [0.5763-0.7080] | 0.0336 | 0.7275 | 1      | 0.2854 | 0.6422 | 1.0882       | 0.598  | 0.6863 | 0.6559 | 0.6306 |
| Zscore_PCC_ANOVA_5_GP      | 0.7905 | [0.7277-0.8532] | 0.032  | 0.7908 | 0.5159 | 0.5405 | 0.7696 | 1.0686       | 0.7353 | 0.8039 | 0.7895 | 0.7523 |
| Zscore_PCC_ANOVA_5_NB      | 0.725  | [0.6553-0.7948] | 0.0356 | 0.7482 | 0.9085 | 0.3971 | 0.6961 | 1.1569       | 0.6176 | 0.7745 | 0.7326 | 0.6695 |
| Zscore_PCC_ANOVA_6_SVM     | 0.8205 | [0.7637-0.8772] | 0.0289 | 0.8265 | 0.5655 | 0.5331 | 0.7647 | 1.1176       | 0.7059 | 0.8235 | 0.8    | 0.7368 |
| Zscore_PCC_ANOVA_6_LDA     | 0.8312 | [0.7761-0.8864] | 0.0281 | 0.8341 | 0.5676 | 0.5424 | 0.7696 | 1.1078       | 0.7157 | 0.8235 | 0.8022 | 0.7434 |
| Zscore_PCC_ANOVA_6_AE      | 0.7147 | [0.6434-0.7860] | 0.0364 | 0.7035 | 0.4869 | 0.4053 | 0.701  | 1.1275       | 0.6373 | 0.7647 | 0.7303 | 0.6783 |
| Zscore_PCC_ANOVA_6_RF      | 0.7741 | [0.7104-0.8378] | 0.0325 | 0.7657 | 0.48   | 0.4438 | 0.7206 | 0.8922       | 0.7745 | 0.6667 | 0.6991 | 0.7473 |
| Zscore_PCC_ANOVA_6_LR      | 0.8211 | [0.7648-0.8774] | 0.0287 | 0.826  | 0.5545 | 0.5424 | 0.7696 | 1.1078       | 0.7157 | 0.8235 | 0.8022 | 0.7434 |
| Zscore_PCC_ANOVA_6_LRLasso | 0.8219 | [0.7657-0.8781] | 0.0287 | 0.8271 | 0.5068 | 0.5303 | 0.7647 | 1.0588       | 0.7353 | 0.7941 | 0.7812 | 0.75   |
| Zscore_PCC_ANOVA_6_AB      | 0.7276 | [0.6587-0.7964] | 0.0351 | 0.6837 | 0.4869 | 0.3874 | 0.6863 | 0.7255       | 0.8235 | 0.549  | 0.6462 | 0.7568 |
| Zscore_PCC_ANOVA_6_DT      | 0.6618 | [0.5965-0.7270] | 0.0333 | 0.7468 | 1      | 0.3235 | 0.6618 | 0.9902       | 0.6667 | 0.6569 | 0.6602 | 0.6634 |
| Zscore_PCC_ANOVA_6_GP      | 0.7901 | [0.7271-0.8531] | 0.0322 | 0.7763 | 0.5414 | 0.5543 | 0.7745 | 1.1373       | 0.7059 | 0.8431 | 0.8182 | 0.7414 |
| Zscore_PCC_ANOVA_6_NB      | 0.7395 | [0.6713-0.8077] | 0.0348 | 0.7392 | 0.8449 | 0.4043 | 0.701  | 0.8922       | 0.7549 | 0.6471 | 0.6814 | 0.7253 |
| Zscore_PCC_ANOVA_7_SVM     | 0.8187 | [0.7622-0.8752] | 0.0288 | 0.8247 | 0.5575 | 0.502  | 0.75   | 1.0882       | 0.7059 | 0.7941 | 0.7742 | 0.7297 |
| Zscore_PCC_ANOVA_7_LDA     | 0.81   | [0.7512-0.8688] | 0.03   | 0.7655 | 0.585  | 0.5041 | 0.75   | 1.1275       | 0.6863 | 0.8137 | 0.7865 | 0.7217 |
| Zscore_PCC_ANOVA_7_AE      | 0.6209 | [0.5438-0.6981] | 0.0394 | 0.6095 | 0.6132 | 0.2771 | 0.6275 | 1.3922       | 0.4314 | 0.8235 | 0.7097 | 0.5915 |
| Zscore_PCC_ANOVA_7_RF      | 0.7815 | [0.7193-0.8436] | 0.0317 | 0.7836 | 0.395  | 0.4619 | 0.7255 | 0.7843       | 0.8333 | 0.6176 | 0.6855 | 0.7875 |
| Zscore_PCC_ANOVA_7_LR      | 0.8082 | [0.7503-0.8662] | 0.0296 | 0.8113 | 0.588  | 0.5041 | 0.75   | 1.1275       | 0.6863 | 0.8137 | 0.7865 | 0.7217 |
| Zscore_PCC_ANOVA_7_LRLasso | 0.7984 | [0.7386-0.8583] | 0.0305 | 0.7852 | 0.5475 | 0.4917 | 0.7451 | 1.0784       | 0.7059 | 0.7843 | 0.766  | 0.7273 |
| Zscore_PCC_ANOVA_7_AB      | 0.7277 | [0.6593-0.7960] | 0.0349 | 0.7115 | 0.5096 | 0.3365 | 0.6667 | 1.1373       | 0.598  | 0.7353 | 0.6932 | 0.6466 |

|                             |        |                 |        |        |        |        |        |        |        |        |        |        |
|-----------------------------|--------|-----------------|--------|--------|--------|--------|--------|--------|--------|--------|--------|--------|
| Zscore_PCC_ANOVA_7_DT       | 0.6667 | [0.6019-0.7314] | 0.0331 | 0.7473 | 1      | 0.3344 | 0.6667 | 1.0784 | 0.6275 | 0.7059 | 0.6809 | 0.6545 |
| Zscore_PCC_ANOVA_7_GP       | 0.7796 | [0.7158-0.8434] | 0.0325 | 0.7742 | 0.5508 | 0.5071 | 0.75   | 1.1667 | 0.6667 | 0.8333 | 0.8    | 0.7143 |
| Zscore_PCC_ANOVA_7_NB       | 0.7366 | [0.6681-0.8052] | 0.035  | 0.7275 | 0.9672 | 0.4217 | 0.7059 | 1.2157 | 0.598  | 0.8137 | 0.7625 | 0.6694 |
| Zscore_PCC_ANOVA_8_SVM      | 0.8355 | [0.7814-0.8897] | 0.0276 | 0.8328 | 0.4817 | 0.5589 | 0.7794 | 1.0098 | 0.7745 | 0.7843 | 0.7822 | 0.7767 |
| Zscore_PCC_ANOVA_8_LDA      | 0.8174 | [0.7590-0.8757] | 0.0298 | 0.7644 | 0.4716 | 0.5394 | 0.7696 | 1.0294 | 0.7549 | 0.7843 | 0.7778 | 0.7619 |
| Zscore_PCC_ANOVA_8_AE       | 0.7042 | [0.6327-0.7756] | 0.0365 | 0.6661 | 0.5054 | 0.3824 | 0.6912 | 1.0098 | 0.6863 | 0.6961 | 0.6931 | 0.6893 |
| Zscore_PCC_ANOVA_8_RF       | 0.7901 | [0.7282-0.8520] | 0.0316 | 0.7731 | 0.395  | 0.5109 | 0.75   | 0.7941 | 0.8529 | 0.6471 | 0.7073 | 0.8148 |
| Zscore_PCC_ANOVA_8_LR       | 0.829  | [0.7737-0.8843] | 0.0282 | 0.8196 | 0.4882 | 0.5394 | 0.7696 | 1.0294 | 0.7549 | 0.7843 | 0.7778 | 0.7619 |
| Zscore_PCC_ANOVA_8_LRLasso  | 0.8163 | [0.7587-0.8739] | 0.0294 | 0.7982 | 0.5052 | 0.5298 | 0.7647 | 1.0392 | 0.7451 | 0.7843 | 0.7755 | 0.7547 |
| Zscore_PCC_ANOVA_8_AB       | 0.7702 | [0.7064-0.8341] | 0.0326 | 0.7576 | 0.5053 | 0.4317 | 0.7157 | 1.0392 | 0.6961 | 0.7353 | 0.7245 | 0.7075 |
| Zscore_PCC_ANOVA_8_DT       | 0.701  | [0.6383-0.7637] | 0.032  | 0.7744 | 1      | 0.4043 | 0.701  | 1.1078 | 0.6471 | 0.7549 | 0.7253 | 0.6814 |
| Zscore_PCC_ANOVA_8_GP       | 0.7886 | [0.7259-0.8514] | 0.032  | 0.7751 | 0.506  | 0.5405 | 0.7696 | 1.0686 | 0.7353 | 0.8039 | 0.7895 | 0.7523 |
| Zscore_PCC_ANOVA_8_NB       | 0.7488 | [0.6820-0.8155] | 0.0341 | 0.7515 | 0.9548 | 0.4169 | 0.7059 | 1.1569 | 0.6275 | 0.7843 | 0.7442 | 0.678  |
| Zscore_PCC_ANOVA_9_SVM      | 0.8346 | [0.7798-0.8893] | 0.0279 | 0.8088 | 0.5205 | 0.5405 | 0.7696 | 1.0686 | 0.7353 | 0.8039 | 0.7895 | 0.7523 |
| Zscore_PCC_ANOVA_9_LDA      | 0.8156 | [0.7568-0.8744] | 0.03   | 0.7613 | 0.4904 | 0.5405 | 0.7696 | 1.0686 | 0.7353 | 0.8039 | 0.7895 | 0.7523 |
| Zscore_PCC_ANOVA_9_AE       | 0.7655 | [0.7000-0.8309] | 0.0334 | 0.7363 | 0.507  | 0.4518 | 0.7255 | 1.0588 | 0.6961 | 0.7549 | 0.7396 | 0.713  |
| Zscore_PCC_ANOVA_9_RF       | 0.809  | [0.7505-0.8676] | 0.0299 | 0.7961 | 0.45   | 0.4917 | 0.7451 | 0.9216 | 0.7843 | 0.7059 | 0.7273 | 0.766  |
| Zscore_PCC_ANOVA_9_LR       | 0.8257 | [0.7696-0.8818] | 0.0286 | 0.8018 | 0.6014 | 0.5227 | 0.7598 | 1.1078 | 0.7059 | 0.8137 | 0.7912 | 0.7345 |
| Zscore_PCC_ANOVA_9_LRLasso  | 0.8157 | [0.7576-0.8739] | 0.0297 | 0.7779 | 0.4059 | 0.5345 | 0.7647 | 0.8627 | 0.8333 | 0.6961 | 0.7328 | 0.8068 |
| Zscore_PCC_ANOVA_9_AB       | 0.7385 | [0.6696-0.8073] | 0.0351 | 0.6705 | 0.5063 | 0.4226 | 0.7108 | 1.0686 | 0.6765 | 0.7451 | 0.7263 | 0.6972 |
| Zscore_PCC_ANOVA_9_DT       | 0.6814 | [0.6173-0.7455] | 0.0327 | 0.7591 | 1      | 0.3636 | 0.6814 | 1.0686 | 0.6471 | 0.7157 | 0.6947 | 0.6697 |
| Zscore_PCC_ANOVA_9_GP       | 0.8064 | [0.7464-0.8665] | 0.0306 | 0.7811 | 0.5083 | 0.561  | 0.7794 | 1.0882 | 0.7353 | 0.8235 | 0.8065 | 0.7568 |
| Zscore_PCC_ANOVA_9_NB       | 0.7562 | [0.6905-0.8220] | 0.0335 | 0.7502 | 0.9843 | 0.4237 | 0.7059 | 1.2353 | 0.5882 | 0.8235 | 0.7692 | 0.6667 |
| Zscore_PCC_ANOVA_10_SVM     | 0.8329 | [0.7778-0.8880] | 0.0281 | 0.808  | 0.5053 | 0.5494 | 0.7745 | 1.0392 | 0.7549 | 0.7941 | 0.7857 | 0.7642 |
| Zscore_PCC_ANOVA_10_LDA     | 0.8164 | [0.7578-0.8750] | 0.0299 | 0.7707 | 0.5599 | 0.5413 | 0.7696 | 1.0882 | 0.7255 | 0.8137 | 0.7957 | 0.7477 |
| Zscore_PCC_ANOVA_10_AE      | 0.6845 | [0.6114-0.7577] | 0.0373 | 0.6249 | 0.5351 | 0.3336 | 0.6667 | 1.0392 | 0.6471 | 0.6863 | 0.6735 | 0.6604 |
| Zscore_PCC_ANOVA_10_RF      | 0.8008 | [0.7409-0.8607] | 0.0305 | 0.7947 | 0.44   | 0.4936 | 0.7451 | 0.8824 | 0.8039 | 0.6863 | 0.7193 | 0.7778 |
| Zscore_PCC_ANOVA_10_LR      | 0.8257 | [0.7696-0.8819] | 0.0286 | 0.8011 | 0.3971 | 0.5239 | 0.7598 | 0.8725 | 0.8235 | 0.6961 | 0.7304 | 0.7978 |
| Zscore_PCC_ANOVA_10_LRLasso | 0.8151 | [0.7568-0.8733] | 0.0297 | 0.7782 | 0.406  | 0.5345 | 0.7647 | 0.8627 | 0.8333 | 0.6961 | 0.7328 | 0.8068 |
| Zscore_PCC_ANOVA_10_AB      | 0.7581 | [0.6919-0.8243] | 0.0338 | 0.7144 | 0.4995 | 0.4412 | 0.7206 | 0.9902 | 0.7255 | 0.7157 | 0.7184 | 0.7228 |
| Zscore_PCC_ANOVA_10_DT      | 0.6422 | [0.5761-0.7082] | 0.0337 | 0.7301 | 1      | 0.2844 | 0.6422 | 1.0294 | 0.6275 | 0.6569 | 0.6465 | 0.6381 |
| Zscore_PCC_ANOVA_10_GP      | 0.8035 | [0.7427-0.8644] | 0.031  | 0.7718 | 0.5004 | 0.5687 | 0.7843 | 1.0196 | 0.7745 | 0.7941 | 0.79   | 0.7788 |
| Zscore_PCC_ANOVA_10_NB      | 0.7546 | [0.6885-0.8207] | 0.0337 | 0.7491 | 0.9838 | 0.4275 | 0.7108 | 1.1667 | 0.6275 | 0.7941 | 0.7529 | 0.6807 |
| Zscore_PCC_ANOVA_11_SVM     | 0.8282 | [0.7727-0.8838] | 0.0283 | 0.8049 | 0.4754 | 0.5208 | 0.7598 | 0.9314 | 0.7941 | 0.7255 | 0.7431 | 0.7789 |
| Zscore_PCC_ANOVA_11_LDA     | 0.8178 | [0.7591-0.8764] | 0.0299 | 0.7514 | 0.5056 | 0.55   | 0.7745 | 1.0588 | 0.7451 | 0.8039 | 0.7917 | 0.7593 |
| Zscore_PCC_ANOVA_11_AE      | 0.7108 | [0.6402-0.7813] | 0.036  | 0.6649 | 0.59   | 0.3452 | 0.6716 | 1.1078 | 0.6176 | 0.7255 | 0.6923 | 0.6549 |
| Zscore_PCC_ANOVA_11_RF      | 0.7988 | [0.7389-0.8587] | 0.0306 | 0.8006 | 0.45   | 0.4646 | 0.7304 | 0.8725 | 0.7941 | 0.6667 | 0.7043 | 0.764  |
| Zscore_PCC_ANOVA_11_LR      | 0.8255 | [0.7693-0.8817] | 0.0287 | 0.7986 | 0.3927 | 0.5239 | 0.7598 | 0.8725 | 0.8235 | 0.6961 | 0.7304 | 0.7978 |
| Zscore_PCC_ANOVA_11_LRLasso | 0.815  | [0.7567-0.8732] | 0.0297 | 0.7781 | 0.4056 | 0.5345 | 0.7647 | 0.8627 | 0.8333 | 0.6961 | 0.7328 | 0.8068 |
| Zscore_PCC_ANOVA_11_AB      | 0.7676 | [0.7026-0.8327] | 0.0332 | 0.7226 | 0.4995 | 0.4518 | 0.7255 | 0.9412 | 0.7549 | 0.6961 | 0.713  | 0.7396 |
| Zscore_PCC_ANOVA_11_DT      | 0.6618 | [0.5966-0.7269] | 0.0332 | 0.7444 | 1      | 0.3239 | 0.6618 | 1.049  | 0.6373 | 0.6863 | 0.6701 | 0.6542 |
| Zscore_PCC_ANOVA_11_GP      | 0.7995 | [0.7383-0.8607] | 0.0312 | 0.7703 | 0.5016 | 0.5591 | 0.7794 | 1.0294 | 0.7647 | 0.7941 | 0.7879 | 0.7714 |
| Zscore_PCC_ANOVA_11_NB      | 0.7511 | [0.6845-0.8176] | 0.0339 | 0.749  | 0.9896 | 0.4275 | 0.7108 | 1.1667 | 0.6275 | 0.7941 | 0.7529 | 0.6807 |
| Zscore_PCC_ANOVA_12_SVM     | 0.828  | [0.7723-0.8838] | 0.0284 | 0.8037 | 0.5377 | 0.5208 | 0.7598 | 1.0686 | 0.7255 | 0.7941 | 0.7789 | 0.7431 |
| Zscore_PCC_ANOVA_12_LDA     | 0.8101 | [0.7499-0.8702] | 0.0307 | 0.7354 | 0.5403 | 0.5216 | 0.7598 | 1.0882 | 0.7157 | 0.8039 | 0.7849 | 0.7387 |
| Zscore_PCC_ANOVA_12_AE      | 0.7758 | [0.7112-0.8403] | 0.0329 | 0.7574 | 0.5488 | 0.481  | 0.7402 | 0.951  | 0.7647 | 0.7157 | 0.729  | 0.7526 |
| Zscore_PCC_ANOVA_12_RF      | 0.7886 | [0.7271-0.8502] | 0.0314 | 0.7784 | 0.38   | 0.4575 | 0.7206 | 0.7353 | 0.8529 | 0.5882 | 0.6744 | 0.8    |
| Zscore_PCC_ANOVA_12_LR      | 0.8292 | [0.7734-0.8850] | 0.0284 | 0.8039 | 0.4828 | 0.5294 | 0.7647 | 1      | 0.7647 | 0.7647 | 0.7647 | 0.7647 |
| Zscore_PCC_ANOVA_12_LRLasso | 0.814  | [0.7556-0.8724] | 0.0298 | 0.7767 | 0.4057 | 0.5162 | 0.7549 | 0.8431 | 0.8333 | 0.6765 | 0.7203 | 0.8023 |
| Zscore_PCC_ANOVA_12_AB      | 0.7558 | [0.6896-0.8219] | 0.0338 | 0.6959 | 0.5    | 0.4053 | 0.701  | 0.8725 | 0.7647 | 0.6373 | 0.6783 | 0.7303 |
| Zscore_PCC_ANOVA_12_DT      | 0.6471 | [0.5812-0.7129] | 0.0336 | 0.7374 | 1      | 0.2943 | 0.6471 | 0.9608 | 0.6667 | 0.6275 | 0.6415 | 0.6531 |
| Zscore_PCC_ANOVA_12_GP      | 0.7982 | [0.7366-0.8597] | 0.0314 | 0.7742 | 0.5064 | 0.5405 | 0.7696 | 1.0686 | 0.7353 | 0.8039 | 0.7895 | 0.7523 |
| Zscore_PCC_ANOVA_12_NB      | 0.7546 | [0.6886-0.8206] | 0.0337 | 0.7689 | 0.9968 | 0.4275 | 0.7108 | 1.1667 | 0.6275 | 0.7941 | 0.7529 | 0.6807 |
| Zscore_PCC_ANOVA_13_SVM     | 0.8334 | [0.7781-0.8886] | 0.0282 | 0.8082 | 0.4542 | 0.5405 | 0.7696 | 0.9314 | 0.8039 | 0.7353 | 0.7523 | 0.7895 |
| Zscore_PCC_ANOVA_13_LDA     | 0.8153 | [0.7571-0.8735] | 0.0297 | 0.7672 | 0.5095 | 0.5303 | 0.7647 | 1.0588 | 0.7353 | 0.7941 | 0.7812 | 0.75   |
| Zscore_PCC_ANOVA_13_AE      | 0.7369 | [0.6692-0.8047] | 0.0346 | 0.731  | 0.5023 | 0.3833 | 0.6912 | 1.0686 | 0.6569 | 0.7255 | 0.7053 | 0.6789 |
| Zscore_PCC_ANOVA_13_RF      | 0.7972 | [0.7373-0.8571] | 0.0306 | 0.7967 | 0.385  | 0.469  | 0.7255 | 0.7255 | 0.8627 | 0.5882 | 0.6769 | 0.8108 |
| Zscore_PCC_ANOVA_13_LR      | 0.8318 | [0.7764-0.8872] | 0.0283 | 0.801  | 0.4104 | 0.5405 | 0.7696 | 0.9314 | 0.8039 | 0.7353 | 0.7523 | 0.7895 |
| Zscore_PCC_ANOVA_13_LRLasso | 0.8253 | [0.7690-0.8816] | 0.0287 | 0.8042 | 0.5053 | 0.5298 | 0.7647 | 1.0392 | 0.7451 | 0.7843 | 0.7755 | 0.7547 |
| Zscore_PCC_ANOVA_13_AB      | 0.7947 | [0.7333-0.8561] | 0.0313 | 0.7505 | 0.4986 | 0.4902 | 0.7451 | 1      | 0.7451 | 0.7451 | 0.7451 | 0.7451 |
| Zscore_PCC_ANOVA_13_DT      | 0.6225 | [0.5557-0.6894] | 0.0341 | 0.7151 | 1      | 0.2452 | 0.6225 | 1.0294 | 0.6078 | 0.6373 | 0.6263 | 0.619  |
| Zscore_PCC_ANOVA_13_GP      | 0.8016 | [0.7404-0.8628] | 0.0312 | 0.77   | 0.5047 | 0.5696 | 0.7843 | 1.0588 | 0.7549 | 0.8137 | 0.8021 | 0.7685 |
| Zscore_PCC_ANOVA_13_NB      | 0.7391 | [0.6713-0.8070] | 0.0346 | 0.7399 | 0.9896 | 0.4035 | 0.701  | 0.9118 | 0.7451 | 0.6569 | 0.6847 | 0.7204 |
| Zscore_PCC_ANOVA_14_SVM     | 0.8412 | [0.7878-0.8947] | 0.0273 | 0.8271 | 0.5    | 0.55   | 0.7745 | 1.0588 | 0.7451 | 0.8039 | 0.7917 | 0.7593 |
| Zscore_PCC_ANOVA_14_LDA     | 0.8195 | [0.7618-0.8772] | 0.0295 | 0.7682 | 0.5284 | 0.5405 | 0.7696 | 1.0686 | 0.7353 | 0.8039 | 0.7895 | 0.7523 |
| Zscore_PCC_ANOVA_14_AE      | 0.5803 | [0.5011-0.6594] | 0.0404 | 0.5355 | 0.6424 | 0.2367 | 0.6078 | 0.5882 | 0.8137 | 0.402  | 0.5764 | 0.6833 |
| Zscore_PCC_ANOVA_14_RF      | 0.8159 | [0.7592-0.8727] | 0.0289 | 0.8129 | 0.555  | 0.472  | 0.7353 | 1.0784 | 0.6961 | 0.7745 | 0.7553 | 0.7182 |
| Zscore_PCC_ANOVA_14_LR      | 0.8361 | [0.7818-0.8905] | 0.0277 | 0.8107 | 0.3813 | 0.5436 | 0.7696 | 0.8725 | 0.8333 | 0.7059 | 0.7391 | 0.809  |
| Zscore_PCC_ANOVA_14_LRLasso | 0.8298 | [0.7744-0.8852] | 0.0283 | 0.8076 | 0.5032 | 0.5399 | 0.7696 | 1.049  | 0.7451 | 0.7941 | 0.7835 | 0.757  |

|                             |                        |        |        |        |        |        |        |        |        |        |        |
|-----------------------------|------------------------|--------|--------|--------|--------|--------|--------|--------|--------|--------|--------|
| Zscore_PCC_ANOVA_14_AB      | 0.7658 [0.7007-0.8308] | 0.0332 | 0.7349 | 0.4981 | 0.4221 | 0.7108 | 0.951  | 0.7353 | 0.6863 | 0.7009 | 0.7216 |
| Zscore_PCC_ANOVA_14_DT      | 0.6471 [0.5815-0.7126] | 0.0334 | 0.731  | 1      | 0.2955 | 0.6471 | 1.098  | 0.598  | 0.6961 | 0.663  | 0.6339 |
| Zscore_PCC_ANOVA_14_GP      | 0.8124 [0.7529-0.8719] | 0.0304 | 0.7897 | 0.5004 | 0.5893 | 0.7941 | 1.0588 | 0.7647 | 0.8235 | 0.8125 | 0.7778 |
| Zscore_PCC_ANOVA_14_NB      | 0.7453 [0.6781-0.8125] | 0.0343 | 0.7484 | 0.9923 | 0.4138 | 0.7059 | 0.902  | 0.7549 | 0.6569 | 0.6875 | 0.7283 |
| Zscore_PCC_ANOVA_15_SVM     | 0.837 [0.7826-0.8915]  | 0.0278 | 0.82   | 0.448  | 0.5601 | 0.7794 | 0.9314 | 0.8137 | 0.7451 | 0.7615 | 0.8    |
| Zscore_PCC_ANOVA_15_LDA     | 0.8167 [0.7580-0.8754] | 0.03   | 0.7583 | 0.5247 | 0.55   | 0.7745 | 1.0588 | 0.7451 | 0.8039 | 0.7917 | 0.7593 |
| Zscore_PCC_ANOVA_15_AE      | 0.7291 [0.6600-0.7983] | 0.0353 | 0.7188 | 0.5005 | 0.4275 | 0.7108 | 0.8333 | 0.7941 | 0.6275 | 0.6807 | 0.7529 |
| Zscore_PCC_ANOVA_15_RF      | 0.8068 [0.7480-0.8655] | 0.03   | 0.7833 | 0.36   | 0.4806 | 0.7304 | 0.7157 | 0.8725 | 0.5882 | 0.6794 | 0.8219 |
| Zscore_PCC_ANOVA_15_LR      | 0.8367 [0.7823-0.8911] | 0.0277 | 0.8083 | 0.3856 | 0.5726 | 0.7843 | 0.8824 | 0.8431 | 0.7255 | 0.7544 | 0.8222 |
| Zscore_PCC_ANOVA_15_LRLasso | 0.828 [0.7720-0.8839]  | 0.0286 | 0.8045 | 0.5033 | 0.5595 | 0.7794 | 1.049  | 0.7549 | 0.8039 | 0.7938 | 0.7664 |
| Zscore_PCC_ANOVA_15_AB      | 0.7884 [0.7249-0.8520] | 0.0324 | 0.7149 | 0.4992 | 0.5099 | 0.7549 | 0.9804 | 0.7647 | 0.7451 | 0.75   | 0.76   |
| Zscore_PCC_ANOVA_15_DT      | 0.6569 [0.5914-0.7223] | 0.0334 | 0.7409 | 1      | 0.314  | 0.6569 | 1.0392 | 0.6373 | 0.6765 | 0.6633 | 0.6509 |
| Zscore_PCC_ANOVA_15_GP      | 0.8042 [0.7436-0.8648] | 0.0309 | 0.7636 | 0.501  | 0.55   | 0.7745 | 1.0588 | 0.7451 | 0.8039 | 0.7917 | 0.7593 |
| Zscore_PCC_ANOVA_15_NB      | 0.7355 [0.6669-0.8041] | 0.035  | 0.7287 | 0.9954 | 0.4335 | 0.7157 | 0.902  | 0.7647 | 0.6667 | 0.6964 | 0.7391 |
| Zscore_PCC_ANOVA_16_SVM     | 0.8317 [0.7761-0.8872] | 0.0284 | 0.8076 | 0.4911 | 0.5589 | 0.7794 | 0.9902 | 0.7843 | 0.7745 | 0.7767 | 0.7822 |
| Zscore_PCC_ANOVA_16_LDA     | 0.8227 [0.7649-0.8804] | 0.0295 | 0.7685 | 0.5218 | 0.5595 | 0.7794 | 1.049  | 0.7549 | 0.8039 | 0.7938 | 0.7664 |
| Zscore_PCC_ANOVA_16_AE      | 0.7332 [0.6640-0.8024] | 0.0353 | 0.7122 | 0.4878 | 0.402  | 0.701  | 0.9902 | 0.7059 | 0.6961 | 0.699  | 0.703  |
| Zscore_PCC_ANOVA_16_RF      | 0.7938 [0.7338-0.8539] | 0.0306 | 0.7927 | 0.395  | 0.4418 | 0.7157 | 0.7843 | 0.8235 | 0.6078 | 0.6774 | 0.775  |
| Zscore_PCC_ANOVA_16_LR      | 0.832 [0.7770-0.8870]  | 0.0281 | 0.8046 | 0.4665 | 0.5295 | 0.7647 | 0.9804 | 0.7745 | 0.7549 | 0.7596 | 0.77   |
| Zscore_PCC_ANOVA_16_LRLasso | 0.8253 [0.7689-0.8816] | 0.0287 | 0.8017 | 0.5033 | 0.5399 | 0.7696 | 1.049  | 0.7451 | 0.7941 | 0.7835 | 0.757  |
| Zscore_PCC_ANOVA_16_AB      | 0.7709 [0.7049-0.8368] | 0.0336 | 0.6877 | 0.5088 | 0.4658 | 0.7304 | 1.1471 | 0.6569 | 0.8039 | 0.7701 | 0.7009 |
| Zscore_PCC_ANOVA_16_DT      | 0.6765 [0.6120-0.7409] | 0.0329 | 0.7561 | 1      | 0.3532 | 0.6765 | 1.0392 | 0.6569 | 0.6961 | 0.6837 | 0.6698 |
| Zscore_PCC_ANOVA_16_GP      | 0.7995 [0.7383-0.8607] | 0.0312 | 0.7582 | 0.501  | 0.5494 | 0.7745 | 1.0392 | 0.7549 | 0.7941 | 0.7857 | 0.7642 |
| Zscore_PCC_ANOVA_16_NB      | 0.7244 [0.6550-0.7939] | 0.0354 | 0.7337 | 0.998  | 0.3941 | 0.6961 | 0.902  | 0.7451 | 0.6471 | 0.6786 | 0.7174 |
| Zscore_PCC_ANOVA_17_SVM     | 0.8264 [0.7702-0.8827] | 0.0287 | 0.8099 | 0.4609 | 0.55   | 0.7745 | 0.9412 | 0.8039 | 0.7451 | 0.7593 | 0.7917 |
| Zscore_PCC_ANOVA_17_LDA     | 0.8217 [0.7634-0.8800] | 0.0298 | 0.7516 | 0.5292 | 0.5696 | 0.7843 | 1.0588 | 0.7549 | 0.8137 | 0.8021 | 0.7685 |
| Zscore_PCC_ANOVA_17_AE      | 0.7428 [0.6753-0.8103] | 0.0344 | 0.732  | 0.5411 | 0.4157 | 0.7059 | 0.8627 | 0.7745 | 0.6373 | 0.681  | 0.7386 |
| Zscore_PCC_ANOVA_17_RF      | 0.8057 [0.7471-0.8642] | 0.0299 | 0.8029 | 0.4    | 0.5069 | 0.7451 | 0.7451 | 0.8725 | 0.6176 | 0.6953 | 0.8289 |
| Zscore_PCC_ANOVA_17_LR      | 0.8235 [0.7670-0.8801] | 0.0289 | 0.7946 | 0.5463 | 0.5216 | 0.7598 | 1.0882 | 0.7157 | 0.8039 | 0.7849 | 0.7387 |
| Zscore_PCC_ANOVA_17_LRLasso | 0.8195 [0.7623-0.8767] | 0.0292 | 0.7966 | 0.5032 | 0.5298 | 0.7647 | 1.0392 | 0.7451 | 0.7843 | 0.7755 | 0.7547 |
| Zscore_PCC_ANOVA_17_AB      | 0.778 [0.7143-0.8417]  | 0.0325 | 0.724  | 0.5061 | 0.4608 | 0.7304 | 1.0098 | 0.7255 | 0.7353 | 0.7327 | 0.7282 |
| Zscore_PCC_ANOVA_17_DT      | 0.6716 [0.6069-0.7362] | 0.033  | 0.752  | 1      | 0.3436 | 0.6716 | 1.049  | 0.6471 | 0.6961 | 0.6804 | 0.6636 |
| Zscore_PCC_ANOVA_17_GP      | 0.7934 [0.7319-0.8550] | 0.0314 | 0.7547 | 0.5022 | 0.5202 | 0.7598 | 1.049  | 0.7353 | 0.7843 | 0.7732 | 0.7477 |
| Zscore_PCC_ANOVA_17_NB      | 0.7098 [0.6388-0.7809] | 0.0362 | 0.6853 | 0.9981 | 0.3855 | 0.6912 | 0.8725 | 0.7549 | 0.6275 | 0.6696 | 0.7191 |
| Zscore_PCC_ANOVA_18_SVM     | 0.8277 [0.7720-0.8833] | 0.0284 | 0.8032 | 0.5134 | 0.5198 | 0.7598 | 1.0294 | 0.7451 | 0.7745 | 0.7677 | 0.7524 |
| Zscore_PCC_ANOVA_18_LDA     | 0.8188 [0.7602-0.8774] | 0.0299 | 0.7532 | 0.4892 | 0.5303 | 0.7647 | 1.0588 | 0.7353 | 0.7941 | 0.7812 | 0.75   |
| Zscore_PCC_ANOVA_18_AE      | 0.7372 [0.6695-0.8049] | 0.0345 | 0.7396 | 0.4994 | 0.4232 | 0.7108 | 0.9118 | 0.7549 | 0.6667 | 0.6937 | 0.7312 |
| Zscore_PCC_ANOVA_18_RF      | 0.7995 [0.7400-0.8589] | 0.0303 | 0.7949 | 0.4    | 0.4753 | 0.7304 | 0.7549 | 0.8529 | 0.6078 | 0.685  | 0.8052 |
| Zscore_PCC_ANOVA_18_LR      | 0.8277 [0.7721-0.8832] | 0.0283 | 0.8    | 0.433  | 0.531  | 0.7647 | 0.9216 | 0.8039 | 0.7255 | 0.7455 | 0.7872 |
| Zscore_PCC_ANOVA_18_LRLasso | 0.8186 [0.7614-0.8758] | 0.0292 | 0.7949 | 0.4583 | 0.5303 | 0.7647 | 0.9412 | 0.7941 | 0.7353 | 0.75   | 0.7812 |
| Zscore_PCC_ANOVA_18_AB      | 0.7611 [0.6942-0.8281] | 0.0342 | 0.6896 | 0.5129 | 0.4646 | 0.7304 | 1.1275 | 0.6667 | 0.7941 | 0.764  | 0.7043 |
| Zscore_PCC_ANOVA_18_DT      | 0.6176 [0.5508-0.6845] | 0.0341 | 0.7096 | 1      | 0.2357 | 0.6176 | 1.0588 | 0.5882 | 0.6471 | 0.625  | 0.6111 |
| Zscore_PCC_ANOVA_18_GP      | 0.7942 [0.7326-0.8558] | 0.0314 | 0.7528 | 0.5019 | 0.5107 | 0.7549 | 1.0588 | 0.7255 | 0.7843 | 0.7708 | 0.7407 |
| Zscore_PCC_ANOVA_18_NB      | 0.708 [0.6369-0.7791]  | 0.0363 | 0.679  | 0.9994 | 0.3761 | 0.6863 | 0.8627 | 0.7549 | 0.6176 | 0.6638 | 0.7159 |
| Zscore_PCC_ANOVA_19_SVM     | 0.8284 [0.7727-0.8842] | 0.0284 | 0.7967 | 0.5127 | 0.5394 | 0.7696 | 1.0294 | 0.7549 | 0.7843 | 0.7778 | 0.7619 |
| Zscore_PCC_ANOVA_19_LDA     | 0.8211 [0.7627-0.8795] | 0.0298 | 0.7564 | 0.4762 | 0.5298 | 0.7647 | 1.0392 | 0.7451 | 0.7843 | 0.7755 | 0.7547 |
| Zscore_PCC_ANOVA_19_AE      | 0.7173 [0.6466-0.7880] | 0.0361 | 0.6579 | 0.4592 | 0.3726 | 0.6863 | 1.0196 | 0.6765 | 0.6961 | 0.69   | 0.6827 |
| Zscore_PCC_ANOVA_19_RF      | 0.8046 [0.7457-0.8634] | 0.03   | 0.8061 | 0.45   | 0.4646 | 0.7304 | 0.8725 | 0.7941 | 0.6667 | 0.7043 | 0.764  |
| Zscore_PCC_ANOVA_19_LR      | 0.8262 [0.7702-0.8822] | 0.0286 | 0.7904 | 0.4987 | 0.5202 | 0.7598 | 1.049  | 0.7353 | 0.7843 | 0.7732 | 0.7477 |
| Zscore_PCC_ANOVA_19_LRLasso | 0.8187 [0.7615-0.8760] | 0.0292 | 0.7936 | 0.4872 | 0.5196 | 0.7598 | 0.9902 | 0.7647 | 0.7549 | 0.7573 | 0.7624 |
| Zscore_PCC_ANOVA_19_AB      | 0.8028 [0.7418-0.8637] | 0.0311 | 0.7675 | 0.5121 | 0.5345 | 0.7647 | 1.1373 | 0.6961 | 0.8333 | 0.8068 | 0.7328 |
| Zscore_PCC_ANOVA_19_DT      | 0.6127 [0.5456-0.6799] | 0.0343 | 0.7076 | 1      | 0.2256 | 0.6127 | 1.0294 | 0.598  | 0.6275 | 0.6162 | 0.6095 |
| Zscore_PCC_ANOVA_19_GP      | 0.7933 [0.7315-0.8550] | 0.0315 | 0.7564 | 0.5012 | 0.531  | 0.7647 | 1.0784 | 0.7255 | 0.8039 | 0.7872 | 0.7455 |
| Zscore_PCC_ANOVA_19_NB      | 0.7131 [0.6424-0.7838] | 0.0361 | 0.6847 | 0.9998 | 0.3928 | 0.6961 | 0.9412 | 0.7255 | 0.6667 | 0.6852 | 0.7083 |
| Zscore_PCC_ANOVA_20_SVM     | 0.8221 [0.7647-0.8795] | 0.0293 | 0.7756 | 0.4879 | 0.5295 | 0.7647 | 0.9804 | 0.7745 | 0.7549 | 0.7596 | 0.77   |
| Zscore_PCC_ANOVA_20_LDA     | 0.8183 [0.7594-0.8772] | 0.03   | 0.7561 | 0.5842 | 0.5239 | 0.7598 | 1.1275 | 0.6961 | 0.8235 | 0.7978 | 0.7304 |
| Zscore_PCC_ANOVA_20_AE      | 0.5874 [0.5087-0.6660] | 0.0401 | 0.536  | 0.5143 | 0.1992 | 0.598  | 0.8235 | 0.6863 | 0.5098 | 0.5833 | 0.619  |
| Zscore_PCC_ANOVA_20_RF      | 0.8108 [0.7532-0.8684] | 0.0294 | 0.8108 | 0.475  | 0.471  | 0.7353 | 0.9608 | 0.7549 | 0.7157 | 0.7264 | 0.7449 |
| Zscore_PCC_ANOVA_20_LR      | 0.817 [0.7590-0.8749]  | 0.0296 | 0.7655 | 0.4538 | 0.5107 | 0.7549 | 0.9412 | 0.7843 | 0.7255 | 0.7407 | 0.7708 |
| Zscore_PCC_ANOVA_20_LRLasso | 0.8131 [0.7543-0.8718] | 0.03   | 0.7643 | 0.4873 | 0.5196 | 0.7598 | 0.9902 | 0.7647 | 0.7549 | 0.7573 | 0.7624 |
| Zscore_PCC_ANOVA_20_AB      | 0.7967 [0.7354-0.8580] | 0.0313 | 0.7622 | 0.5168 | 0.5132 | 0.75   | 1.2255 | 0.6373 | 0.8627 | 0.8228 | 0.704  |
| Zscore_PCC_ANOVA_20_DT      | 0.6029 [0.5355-0.6704] | 0.0344 | 0.7001 | 1      | 0.206  | 0.6029 | 1.0294 | 0.5882 | 0.6176 | 0.6061 | 0.6    |
| Zscore_PCC_ANOVA_20_GP      | 0.7943 [0.7326-0.8560] | 0.0315 | 0.7625 | 0.5019 | 0.532  | 0.7647 | 1.098  | 0.7157 | 0.8137 | 0.7935 | 0.7411 |
| Zscore_PCC_ANOVA_20_NB      | 0.7039 [0.6319-0.7758] | 0.0367 | 0.6561 | 1      | 0.3642 | 0.6814 | 1.0882 | 0.6373 | 0.7255 | 0.6989 | 0.6667 |
| Zscore_PCC_KW_1_SVM         | 0.6427 [0.5650-0.7203] | 0.0396 | 0.5945 | 0.5219 | 0.3051 | 0.652  | 0.9118 | 0.6961 | 0.6078 | 0.6396 | 0.6667 |
| Zscore_PCC_KW_1_LDA         | 0.5594 [0.4795-0.6393] | 0.0408 | 0.5331 | 0.5231 | 0.1864 | 0.5931 | 1.0294 | 0.5784 | 0.6078 | 0.596  | 0.5905 |
| Zscore_PCC_KW_1_AE          | 0.5018 [0.4205-0.5831] | 0.0415 | 0.484  | 0.5226 | 0.1664 | 0.5784 | 0.6667 | 0.7451 | 0.4118 | 0.5588 | 0.6176 |
| Zscore_PCC_KW_1_RF          | 0.6371 [0.5611-0.7132] | 0.0388 | 0.6431 | 0.39   | 0.2553 | 0.6275 | 0.9412 | 0.6569 | 0.598  | 0.6204 | 0.6354 |
| Zscore_PCC_KW_1_LR          | 0.6046 [0.5258-0.6833] | 0.0402 | 0.5619 | 0.5323 | 0.2364 | 0.6176 | 0.902  | 0.6667 | 0.5686 | 0.6071 | 0.6304 |

|                         |                        |        |        |        |        |        |        |        |        |        |        |
|-------------------------|------------------------|--------|--------|--------|--------|--------|--------|--------|--------|--------|--------|
| Zscore_PCC_KW_1_LRLasso | 0.6076 [0.5291-0.6860] | 0.04   | 0.5678 | 0.5355 | 0.241  | 0.6176 | 0.7843 | 0.7255 | 0.5098 | 0.5968 | 0.65   |
| Zscore_PCC_KW_1_AB      | 0.6404 [0.5644-0.7165] | 0.0388 | 0.6266 | 0.5026 | 0.2663 | 0.6324 | 1.1078 | 0.5784 | 0.6863 | 0.6484 | 0.6195 |
| Zscore_PCC_KW_1_DT      | 0.6127 [0.5456-0.6799] | 0.0343 | 0.7116 | 1      | 0.2256 | 0.6127 | 0.9706 | 0.6275 | 0.598  | 0.6095 | 0.6162 |
| Zscore_PCC_KW_1_GP      | 0.5796 [0.5003-0.6588] | 0.0404 | 0.5366 | 0.5366 | 0.2039 | 0.598  | 1.2745 | 0.4608 | 0.7353 | 0.6351 | 0.5769 |
| Zscore_PCC_KW_1_NB      | 0.5822 [0.5034-0.6610] | 0.0402 | 0.5632 | 0.9739 | 0.1864 | 0.5931 | 1.0294 | 0.5784 | 0.6078 | 0.596  | 0.5905 |
| Zscore_PCC_KW_2_SVM     | 0.6514 [0.5763-0.7265] | 0.0383 | 0.6417 | 0.5969 | 0.3012 | 0.6373 | 1.4118 | 0.4314 | 0.8431 | 0.7333 | 0.5972 |
| Zscore_PCC_KW_2_LDA     | 0.5789 [0.5001-0.6577] | 0.0402 | 0.5664 | 0.5942 | 0.2096 | 0.598  | 1.3529 | 0.4216 | 0.7745 | 0.6515 | 0.5725 |
| Zscore_PCC_KW_2_AE      | 0.6146 [0.5376-0.6916] | 0.0393 | 0.6152 | 0.497  | 0.2639 | 0.6127 | 1.5196 | 0.3529 | 0.8725 | 0.7347 | 0.5742 |
| Zscore_PCC_KW_2_RF      | 0.6748 [0.6010-0.7487] | 0.0377 | 0.6528 | 0.495  | 0.3143 | 0.6569 | 0.9412 | 0.6863 | 0.6275 | 0.6481 | 0.6667 |
| Zscore_PCC_KW_2_LR      | 0.6463 [0.5708-0.7218] | 0.0385 | 0.6264 | 0.6081 | 0.2919 | 0.6324 | 1.4216 | 0.4216 | 0.8431 | 0.7288 | 0.5931 |
| Zscore_PCC_KW_2_LRLasso | 0.6455 [0.5700-0.7210] | 0.0385 | 0.6335 | 0.6047 | 0.3012 | 0.6373 | 1.4118 | 0.4314 | 0.8431 | 0.7333 | 0.5972 |
| Zscore_PCC_KW_2_AB      | 0.72 [0.6493-0.7907]   | 0.0361 | 0.6919 | 0.502  | 0.4291 | 0.7108 | 1.1863 | 0.6176 | 0.8039 | 0.759  | 0.6777 |
| Zscore_PCC_KW_2_DT      | 0.5882 [0.5204-0.6561] | 0.0346 | 0.6896 | 1      | 0.1765 | 0.5882 | 1.0196 | 0.5784 | 0.598  | 0.59   | 0.5865 |
| Zscore_PCC_KW_2_GP      | 0.6135 [0.5353-0.6917] | 0.0399 | 0.6069 | 0.5871 | 0.3012 | 0.6373 | 1.4118 | 0.4314 | 0.8431 | 0.7333 | 0.5972 |
| Zscore_PCC_KW_2_NB      | 0.643 [0.5675-0.7186]  | 0.0385 | 0.6143 | 0.9818 | 0.2461 | 0.6225 | 0.9118 | 0.6667 | 0.5784 | 0.6126 | 0.6344 |
| Zscore_PCC_KW_3_SVM     | 0.7135 [0.6436-0.7833] | 0.0356 | 0.7138 | 0.3703 | 0.3558 | 0.6716 | 0.7353 | 0.8039 | 0.5392 | 0.6357 | 0.7333 |
| Zscore_PCC_KW_3_LDA     | 0.6487 [0.5733-0.7241] | 0.0385 | 0.6305 | 0.647  | 0.2818 | 0.6324 | 1.3431 | 0.4608 | 0.8039 | 0.7015 | 0.5985 |
| Zscore_PCC_KW_3_AE      | 0.6238 [0.5464-0.7012] | 0.0395 | 0.5713 | 0.4921 | 0.2648 | 0.6324 | 0.9706 | 0.6471 | 0.6176 | 0.6286 | 0.6364 |
| Zscore_PCC_KW_3_RF      | 0.6947 [0.6216-0.7679] | 0.0373 | 0.6924 | 0.585  | 0.3732 | 0.6863 | 1.0588 | 0.6569 | 0.7157 | 0.6979 | 0.6759 |
| Zscore_PCC_KW_3_LR      | 0.7064 [0.6357-0.7770] | 0.0361 | 0.7091 | 0.3703 | 0.3337 | 0.6618 | 0.7549 | 0.7843 | 0.5392 | 0.6299 | 0.7143 |
| Zscore_PCC_KW_3_LRLasso | 0.7071 [0.6366-0.7777] | 0.036  | 0.7092 | 0.3829 | 0.3337 | 0.6618 | 0.7549 | 0.7843 | 0.5392 | 0.6299 | 0.7143 |
| Zscore_PCC_KW_3_AB      | 0.7168 [0.6461-0.7875] | 0.0361 | 0.6709 | 0.502  | 0.3632 | 0.6814 | 1.049  | 0.6569 | 0.7059 | 0.6907 | 0.6729 |
| Zscore_PCC_KW_3_DT      | 0.5882 [0.5205-0.6560] | 0.0346 | 0.6961 | 1      | 0.1768 | 0.5882 | 0.9412 | 0.6176 | 0.5588 | 0.5833 | 0.5938 |
| Zscore_PCC_KW_3_GP      | 0.6876 [0.6146-0.7606] | 0.0372 | 0.6735 | 0.526  | 0.3243 | 0.6618 | 1.0686 | 0.6275 | 0.6961 | 0.6737 | 0.6514 |
| Zscore_PCC_KW_3_NB      | 0.6675 [0.5934-0.7417] | 0.0378 | 0.6336 | 0.992  | 0.3043 | 0.652  | 1.049  | 0.6275 | 0.6765 | 0.6598 | 0.6449 |
| Zscore_PCC_KW_4_SVM     | 0.7688 [0.7048-0.8329] | 0.0327 | 0.7621 | 0.404  | 0.4551 | 0.7206 | 0.7549 | 0.8431 | 0.598  | 0.6772 | 0.7922 |
| Zscore_PCC_KW_4_LDA     | 0.7111 [0.6400-0.7822] | 0.0363 | 0.6707 | 0.469  | 0.3815 | 0.6863 | 0.7843 | 0.7941 | 0.5784 | 0.6532 | 0.7375 |
| Zscore_PCC_KW_4_AE      | 0.7331 [0.6630-0.8031] | 0.0357 | 0.6883 | 0.4755 | 0.4138 | 0.7059 | 0.902  | 0.7549 | 0.6569 | 0.6875 | 0.7283 |
| Zscore_PCC_KW_4_RF      | 0.7432 [0.6752-0.8112] | 0.0347 | 0.7411 | 0.525  | 0.4029 | 0.701  | 0.9314 | 0.7353 | 0.6667 | 0.6881 | 0.7158 |
| Zscore_PCC_KW_4_LR      | 0.765 [0.7001-0.8298]  | 0.0331 | 0.7613 | 0.4481 | 0.4327 | 0.7157 | 0.9216 | 0.7549 | 0.6765 | 0.7    | 0.734  |
| Zscore_PCC_KW_4_LRLasso | 0.7672 [0.7027-0.8317] | 0.0329 | 0.7642 | 0.4254 | 0.4383 | 0.7157 | 0.8235 | 0.8039 | 0.6275 | 0.6833 | 0.7619 |
| Zscore_PCC_KW_4_AB      | 0.7257 [0.6561-0.7953] | 0.0355 | 0.687  | 0.501  | 0.4121 | 0.7059 | 1.0392 | 0.6863 | 0.7255 | 0.7143 | 0.6981 |
| Zscore_PCC_KW_4_DT      | 0.5931 [0.5256-0.6607] | 0.0345 | 0.7004 | 1      | 0.1867 | 0.5931 | 0.9314 | 0.6275 | 0.5588 | 0.5872 | 0.6    |
| Zscore_PCC_KW_4_GP      | 0.7594 [0.6935-0.8254] | 0.0336 | 0.7549 | 0.5531 | 0.4553 | 0.7255 | 1.1373 | 0.6569 | 0.7941 | 0.7614 | 0.6983 |
| Zscore_PCC_KW_4_NB      | 0.7094 [0.6373-0.7816] | 0.0368 | 0.6549 | 0.9968 | 0.4327 | 0.7108 | 1.2255 | 0.598  | 0.8235 | 0.7722 | 0.672  |
| Zscore_PCC_KW_5_SVM     | 0.7767 [0.7139-0.8396] | 0.0321 | 0.7739 | 0.5054 | 0.4412 | 0.7206 | 1.0098 | 0.7157 | 0.7255 | 0.7228 | 0.7184 |
| Zscore_PCC_KW_5_LDA     | 0.7296 [0.6609-0.7984] | 0.0351 | 0.7001 | 0.4728 | 0.3692 | 0.6814 | 0.8137 | 0.7745 | 0.5882 | 0.6529 | 0.7229 |
| Zscore_PCC_KW_5_AE      | 0.6032 [0.5243-0.6822] | 0.0403 | 0.5412 | 0.4723 | 0.255  | 0.6275 | 0.9804 | 0.6373 | 0.6176 | 0.625  | 0.63   |
| Zscore_PCC_KW_5_RF      | 0.7602 [0.6945-0.8259] | 0.0335 | 0.752  | 0.57   | 0.4118 | 0.7059 | 1.0196 | 0.6961 | 0.7157 | 0.71   | 0.7019 |
| Zscore_PCC_KW_5_LR      | 0.7734 [0.7098-0.8369] | 0.0324 | 0.7731 | 0.5142 | 0.4414 | 0.7206 | 1.0294 | 0.7059 | 0.7353 | 0.7273 | 0.7143 |
| Zscore_PCC_KW_5_LRLasso | 0.7762 [0.7130-0.8394] | 0.0322 | 0.7751 | 0.5127 | 0.4608 | 0.7304 | 1.0098 | 0.7255 | 0.7353 | 0.7327 | 0.7282 |
| Zscore_PCC_KW_5_AB      | 0.733 [0.6639-0.8021]  | 0.0353 | 0.6907 | 0.4876 | 0.4649 | 0.7108 | 0.5784 | 0.9216 | 0.5    | 0.6483 | 0.8644 |
| Zscore_PCC_KW_5_DT      | 0.6078 [0.5409-0.6748] | 0.0342 | 0.6995 | 1      | 0.2167 | 0.6078 | 1.098  | 0.5588 | 0.6569 | 0.6196 | 0.5982 |
| Zscore_PCC_KW_5_GP      | 0.7699 [0.7046-0.8352] | 0.0333 | 0.7537 | 0.5379 | 0.4626 | 0.7304 | 1.0882 | 0.6863 | 0.7745 | 0.7527 | 0.7117 |
| Zscore_PCC_KW_5_NB      | 0.7268 [0.6557-0.7979] | 0.0363 | 0.6606 | 0.9978 | 0.4043 | 0.701  | 1.1078 | 0.6471 | 0.7549 | 0.7253 | 0.6814 |
| Zscore_PCC_KW_6_SVM     | 0.8004 [0.7409-0.8598] | 0.0303 | 0.8081 | 0.4742 | 0.4608 | 0.7304 | 0.9902 | 0.7353 | 0.7255 | 0.7282 | 0.7327 |
| Zscore_PCC_KW_6_LDA     | 0.7785 [0.7153-0.8418] | 0.0323 | 0.7455 | 0.4537 | 0.4646 | 0.7304 | 0.8725 | 0.7941 | 0.6667 | 0.7043 | 0.764  |
| Zscore_PCC_KW_6_AE      | 0.7371 [0.6692-0.8051] | 0.0347 | 0.7247 | 0.5026 | 0.3984 | 0.6961 | 1.1765 | 0.6078 | 0.7843 | 0.7381 | 0.6667 |
| Zscore_PCC_KW_6_RF      | 0.7672 [0.7023-0.8320] | 0.0331 | 0.7662 | 0.41   | 0.4566 | 0.7255 | 0.8431 | 0.8039 | 0.6471 | 0.6949 | 0.7674 |
| Zscore_PCC_KW_6_LR      | 0.8006 [0.7409-0.8602] | 0.0305 | 0.8055 | 0.3236 | 0.5077 | 0.7402 | 0.6765 | 0.902  | 0.5784 | 0.6815 | 0.8551 |
| Zscore_PCC_KW_6_LRLasso | 0.8021 [0.7427-0.8615] | 0.0303 | 0.8106 | 0.511  | 0.471  | 0.7353 | 1.0392 | 0.7157 | 0.7549 | 0.7449 | 0.7264 |
| Zscore_PCC_KW_6_AB      | 0.754 [0.6871-0.8209]  | 0.0341 | 0.7132 | 0.5013 | 0.4414 | 0.7206 | 1.0294 | 0.7059 | 0.7353 | 0.7273 | 0.7143 |
| Zscore_PCC_KW_6_DT      | 0.5735 [0.5057-0.6413] | 0.0346 | 0.6711 | 1      | 0.1479 | 0.5735 | 1.1078 | 0.5196 | 0.6275 | 0.5824 | 0.5664 |
| Zscore_PCC_KW_6_GP      | 0.7958 [0.7348-0.8569] | 0.0312 | 0.8063 | 0.545  | 0.4739 | 0.7353 | 1.1176 | 0.6765 | 0.7941 | 0.7667 | 0.7105 |
| Zscore_PCC_KW_6_NB      | 0.7314 [0.6618-0.8011] | 0.0355 | 0.6885 | 0.9988 | 0.4237 | 0.7059 | 1.2353 | 0.5882 | 0.8235 | 0.7692 | 0.6667 |
| Zscore_PCC_KW_7_SVM     | 0.7986 [0.7388-0.8585] | 0.0305 | 0.803  | 0.5171 | 0.4613 | 0.7304 | 1.049  | 0.7059 | 0.7549 | 0.7423 | 0.7196 |
| Zscore_PCC_KW_7_LDA     | 0.7825 [0.7194-0.8455] | 0.0322 | 0.7462 | 0.3867 | 0.5109 | 0.75   | 0.7941 | 0.8529 | 0.6471 | 0.7073 | 0.8148 |
| Zscore_PCC_KW_7_AE      | 0.7338 [0.6647-0.8028] | 0.0352 | 0.71   | 0.5896 | 0.4035 | 0.701  | 1.0882 | 0.6569 | 0.7451 | 0.7204 | 0.6847 |
| Zscore_PCC_KW_7_RF      | 0.7745 [0.7112-0.8377] | 0.0323 | 0.7769 | 0.49   | 0.4226 | 0.7108 | 0.9314 | 0.7451 | 0.6765 | 0.6972 | 0.7263 |
| Zscore_PCC_KW_7_LR      | 0.7986 [0.7385-0.8587] | 0.0307 | 0.8034 | 0.5059 | 0.4804 | 0.7402 | 1.0098 | 0.7353 | 0.7451 | 0.7426 | 0.7379 |
| Zscore_PCC_KW_7_LRLasso | 0.8024 [0.7430-0.8618] | 0.0303 | 0.8108 | 0.5081 | 0.471  | 0.7353 | 1.0392 | 0.7157 | 0.7549 | 0.7449 | 0.7264 |
| Zscore_PCC_KW_7_AB      | 0.7656 [0.6998-0.8315] | 0.0336 | 0.6871 | 0.5003 | 0.4511 | 0.7255 | 1.0196 | 0.7157 | 0.7353 | 0.73   | 0.7212 |
| Zscore_PCC_KW_7_DT      | 0.6275 [0.5608-0.6941] | 0.034  | 0.7206 | 1      | 0.2549 | 0.6275 | 1      | 0.6275 | 0.6275 | 0.6275 | 0.6275 |
| Zscore_PCC_KW_7_GP      | 0.7845 [0.7220-0.8470] | 0.0319 | 0.7944 | 0.5079 | 0.4804 | 0.7402 | 0.9902 | 0.7451 | 0.7353 | 0.7379 | 0.7426 |
| Zscore_PCC_KW_7_NB      | 0.7208 [0.6509-0.7907] | 0.0357 | 0.6915 | 0.9993 | 0.3679 | 0.6814 | 1.1667 | 0.598  | 0.7647 | 0.7176 | 0.6555 |
| Zscore_PCC_KW_8_SVM     | 0.8198 [0.7633-0.8762] | 0.0288 | 0.8166 | 0.5594 | 0.502  | 0.75   | 1.0882 | 0.7059 | 0.7941 | 0.7742 | 0.7297 |
| Zscore_PCC_KW_8_LDA     | 0.8051 [0.7454-0.8647] | 0.0304 | 0.7618 | 0.3708 | 0.4999 | 0.7451 | 0.8039 | 0.8431 | 0.6471 | 0.7049 | 0.8049 |
| Zscore_PCC_KW_8_AE      | 0.7195 [0.6498-0.7893] | 0.0356 | 0.7139 | 0.4923 | 0.3717 | 0.6765 | 0.6863 | 0.8333 | 0.5196 | 0.6343 | 0.7571 |
| Zscore_PCC_KW_8_RF      | 0.7962 [0.7362-0.8562] | 0.0306 | 0.8035 | 0.405  | 0.4474 | 0.7206 | 0.8333 | 0.8039 | 0.6373 | 0.6891 | 0.7647 |

|                          |                        |        |        |        |        |        |        |        |        |        |        |
|--------------------------|------------------------|--------|--------|--------|--------|--------|--------|--------|--------|--------|--------|
| Zscore_PCC_KW_8_LR       | 0.822 [0.7659-0.8781]  | 0.0286 | 0.8215 | 0.5157 | 0.5303 | 0.7647 | 1.0588 | 0.7353 | 0.7941 | 0.7812 | 0.75   |
| Zscore_PCC_KW_8_LRLasso  | 0.8255 [0.7701-0.8810] | 0.0283 | 0.8271 | 0.5755 | 0.5216 | 0.7598 | 1.0882 | 0.7157 | 0.8039 | 0.7849 | 0.7387 |
| Zscore_PCC_KW_8_AB       | 0.7717 [0.7076-0.8358] | 0.0327 | 0.7352 | 0.508  | 0.4344 | 0.7157 | 1.1176 | 0.6569 | 0.7745 | 0.7444 | 0.693  |
| Zscore_PCC_KW_8_DT       | 0.6373 [0.5710-0.7035] | 0.0338 | 0.7291 | 1      | 0.2746 | 0.6373 | 0.9804 | 0.6471 | 0.6275 | 0.6346 | 0.64   |
| Zscore_PCC_KW_8_GP       | 0.7834 [0.7208-0.8459] | 0.0319 | 0.7939 | 0.5087 | 0.4815 | 0.7402 | 1.0686 | 0.7059 | 0.7745 | 0.7579 | 0.7248 |
| Zscore_PCC_KW_8_NB       | 0.7467 [0.6797-0.8138] | 0.0342 | 0.7112 | 0.9994 | 0.449  | 0.7206 | 1.1863 | 0.6275 | 0.8137 | 0.7711 | 0.686  |
| Zscore_PCC_KW_9_SVM      | 0.8392 [0.7851-0.8933] | 0.0276 | 0.8294 | 0.3629 | 0.5736 | 0.7794 | 0.7745 | 0.8922 | 0.6667 | 0.728  | 0.8608 |
| Zscore_PCC_KW_9_LDA      | 0.8303 [0.7741-0.8864] | 0.0287 | 0.7891 | 0.3668 | 0.5848 | 0.7892 | 0.8529 | 0.8627 | 0.7157 | 0.7521 | 0.8391 |
| Zscore_PCC_KW_9_AE       | 0.7161 [0.6462-0.7859] | 0.0356 | 0.6977 | 0.4994 | 0.3563 | 0.6765 | 1.1373 | 0.6078 | 0.7451 | 0.7045 | 0.6552 |
| Zscore_PCC_KW_9_RF       | 0.7834 [0.7205-0.8462] | 0.0321 | 0.7781 | 0.365  | 0.4551 | 0.7206 | 0.7549 | 0.8431 | 0.598  | 0.6772 | 0.7922 |
| Zscore_PCC_KW_9_LR       | 0.8343 [0.7797-0.8889] | 0.0278 | 0.8274 | 0.4906 | 0.5399 | 0.7696 | 1.049  | 0.7451 | 0.7941 | 0.7835 | 0.757  |
| Zscore_PCC_KW_9_LRLasso  | 0.835 [0.7805-0.8895]  | 0.0278 | 0.831  | 0.4125 | 0.5543 | 0.7745 | 0.8627 | 0.8431 | 0.7059 | 0.7414 | 0.8182 |
| Zscore_PCC_KW_9_AB       | 0.7735 [0.7096-0.8373] | 0.0326 | 0.7304 | 0.4853 | 0.4486 | 0.7157 | 0.7255 | 0.8529 | 0.5784 | 0.6692 | 0.7973 |
| Zscore_PCC_KW_9_DT       | 0.6667 [0.6018-0.7315] | 0.0331 | 0.7479 | 1      | 0.3339 | 0.6667 | 1.0588 | 0.6373 | 0.6961 | 0.6771 | 0.6574 |
| Zscore_PCC_KW_9_GP       | 0.7921 [0.7296-0.8546] | 0.0319 | 0.7737 | 0.5059 | 0.55   | 0.7745 | 1.0588 | 0.7451 | 0.8039 | 0.7917 | 0.7593 |
| Zscore_PCC_KW_9_NB       | 0.7488 [0.6820-0.8155] | 0.0341 | 0.7368 | 0.9994 | 0.4183 | 0.7059 | 1.1765 | 0.6176 | 0.7941 | 0.75   | 0.675  |
| Zscore_PCC_KW_10_SVM     | 0.8373 [0.7834-0.8912] | 0.0275 | 0.8284 | 0.5177 | 0.5303 | 0.7647 | 1.0588 | 0.7353 | 0.7941 | 0.7812 | 0.75   |
| Zscore_PCC_KW_10_LDA     | 0.81 [0.7501-0.8698]   | 0.0305 | 0.7431 | 0.4694 | 0.5295 | 0.7647 | 0.9804 | 0.7745 | 0.7549 | 0.7596 | 0.77   |
| Zscore_PCC_KW_10_AE      | 0.7737 [0.7097-0.8378] | 0.0327 | 0.7871 | 0.529  | 0.502  | 0.75   | 1.0882 | 0.7059 | 0.7941 | 0.7742 | 0.7297 |
| Zscore_PCC_KW_10_RF      | 0.7999 [0.7399-0.8599] | 0.0306 | 0.7923 | 0.45   | 0.4646 | 0.7304 | 0.8725 | 0.7941 | 0.6667 | 0.7043 | 0.764  |
| Zscore_PCC_KW_10_LR      | 0.8304 [0.7752-0.8855] | 0.0281 | 0.8219 | 0.6075 | 0.536  | 0.7647 | 1.1569 | 0.6863 | 0.8431 | 0.814  | 0.7288 |
| Zscore_PCC_KW_10_LRLasso | 0.8283 [0.7728-0.8838] | 0.0283 | 0.82   | 0.5755 | 0.5345 | 0.7647 | 1.1373 | 0.6961 | 0.8333 | 0.8068 | 0.7328 |
| Zscore_PCC_KW_10_AB      | 0.7339 [0.6657-0.8022] | 0.0348 | 0.6878 | 0.4842 | 0.3898 | 0.6863 | 0.7059 | 0.8333 | 0.5392 | 0.6439 | 0.7639 |
| Zscore_PCC_KW_10_DT      | 0.6765 [0.6120-0.7410] | 0.0329 | 0.7574 | 1      | 0.3529 | 0.6765 | 1      | 0.6765 | 0.6765 | 0.6765 | 0.6765 |
| Zscore_PCC_KW_10_GP      | 0.8021 [0.7412-0.8630] | 0.0311 | 0.7753 | 0.502  | 0.5494 | 0.7745 | 1.0392 | 0.7549 | 0.7941 | 0.7857 | 0.7642 |
| Zscore_PCC_KW_10_NB      | 0.7502 [0.6835-0.8169] | 0.034  | 0.7315 | 0.9995 | 0.4275 | 0.7108 | 1.1667 | 0.6275 | 0.7941 | 0.7529 | 0.6807 |
| Zscore_PCC_KW_11_SVM     | 0.838 [0.7844-0.8917]  | 0.0274 | 0.8312 | 0.5477 | 0.5331 | 0.7647 | 1.1176 | 0.7059 | 0.8235 | 0.8    | 0.7368 |
| Zscore_PCC_KW_11_LDA     | 0.8122 [0.7531-0.8713] | 0.0302 | 0.7673 | 0.4359 | 0.5399 | 0.7696 | 0.951  | 0.7941 | 0.7451 | 0.757  | 0.7835 |
| Zscore_PCC_KW_11_AE      | 0.5442 [0.4648-0.6236] | 0.0405 | 0.5282 | 0.4675 | 0.1978 | 0.5588 | 0.1961 | 0.9608 | 0.1569 | 0.5326 | 0.8    |
| Zscore_PCC_KW_11_RF      | 0.7989 [0.7388-0.8589] | 0.0306 | 0.7966 | 0.445  | 0.4729 | 0.7353 | 0.902  | 0.7843 | 0.6863 | 0.7143 | 0.7609 |
| Zscore_PCC_KW_11_LR      | 0.8304 [0.7753-0.8854] | 0.0281 | 0.8237 | 0.6081 | 0.536  | 0.7647 | 1.1569 | 0.6863 | 0.8431 | 0.814  | 0.7288 |
| Zscore_PCC_KW_11_LRLasso | 0.8283 [0.7728-0.8838] | 0.0283 | 0.82   | 0.5755 | 0.5345 | 0.7647 | 1.1373 | 0.6961 | 0.8333 | 0.8068 | 0.7328 |
| Zscore_PCC_KW_11_AB      | 0.7472 [0.6797-0.8147] | 0.0345 | 0.7047 | 0.4964 | 0.4335 | 0.7157 | 0.902  | 0.7647 | 0.6667 | 0.6964 | 0.7391 |
| Zscore_PCC_KW_11_DT      | 0.6225 [0.5558-0.6893] | 0.0341 | 0.7139 | 1      | 0.2454 | 0.6225 | 1.049  | 0.598  | 0.6471 | 0.6289 | 0.6168 |
| Zscore_PCC_KW_11_GP      | 0.7955 [0.7336-0.8573] | 0.0315 | 0.7731 | 0.5161 | 0.5134 | 0.7549 | 1.1176 | 0.6961 | 0.8137 | 0.7889 | 0.7281 |
| Zscore_PCC_KW_11_NB      | 0.7577 [0.6918-0.8236] | 0.0336 | 0.7527 | 0.9999 | 0.4275 | 0.7108 | 1.1667 | 0.6275 | 0.7941 | 0.7529 | 0.6807 |
| Zscore_PCC_KW_12_SVM     | 0.8426 [0.7894-0.8959] | 0.0272 | 0.8343 | 0.5097 | 0.5691 | 0.7843 | 1.0392 | 0.7647 | 0.8039 | 0.7959 | 0.7736 |
| Zscore_PCC_KW_12_LDA     | 0.817 [0.7583-0.8757]  | 0.03   | 0.7832 | 0.4727 | 0.549  | 0.7745 | 1      | 0.7745 | 0.7745 | 0.7745 | 0.7745 |
| Zscore_PCC_KW_12_AE      | 0.7 [0.6280-0.7721]    | 0.0368 | 0.6503 | 0.4982 | 0.365  | 0.6765 | 0.7451 | 0.8039 | 0.549  | 0.6406 | 0.7368 |
| Zscore_PCC_KW_12_RF      | 0.8035 [0.7440-0.8630] | 0.0304 | 0.8033 | 0.54   | 0.4815 | 0.7402 | 1.0686 | 0.7059 | 0.7745 | 0.7579 | 0.7248 |
| Zscore_PCC_KW_12_LR      | 0.8356 [0.7810-0.8903] | 0.0279 | 0.8214 | 0.4859 | 0.5591 | 0.7794 | 1.0294 | 0.7647 | 0.7941 | 0.7879 | 0.7714 |
| Zscore_PCC_KW_12_LRLasso | 0.8356 [0.7810-0.8903] | 0.0279 | 0.827  | 0.4042 | 0.5621 | 0.7794 | 0.8922 | 0.8333 | 0.7255 | 0.7522 | 0.8132 |
| Zscore_PCC_KW_12_AB      | 0.7311 [0.6620-0.8001] | 0.0352 | 0.6978 | 0.4919 | 0.4237 | 0.7059 | 0.7647 | 0.8235 | 0.5882 | 0.6667 | 0.7692 |
| Zscore_PCC_KW_12_DT      | 0.6667 [0.6017-0.7316] | 0.0331 | 0.7485 | 1      | 0.3336 | 0.6667 | 1.0392 | 0.6471 | 0.6863 | 0.6735 | 0.6604 |
| Zscore_PCC_KW_12_GP      | 0.8 [0.7387-0.8613]    | 0.0313 | 0.7769 | 0.5038 | 0.5405 | 0.7696 | 1.0686 | 0.7353 | 0.8039 | 0.7895 | 0.7523 |
| Zscore_PCC_KW_12_NB      | 0.7592 [0.6935-0.8250] | 0.0335 | 0.7476 | 0.9999 | 0.4335 | 0.7157 | 1.098  | 0.6667 | 0.7647 | 0.7391 | 0.6964 |
| Zscore_PCC_KW_13_SVM     | 0.8303 [0.7753-0.8852] | 0.0281 | 0.8217 | 0.4875 | 0.5295 | 0.7647 | 0.9804 | 0.7745 | 0.7549 | 0.7596 | 0.77   |
| Zscore_PCC_KW_13_LDA     | 0.8075 [0.7472-0.8677] | 0.0307 | 0.7365 | 0.452  | 0.5099 | 0.7549 | 0.9804 | 0.7647 | 0.7451 | 0.75   | 0.76   |
| Zscore_PCC_KW_13_AE      | 0.7263 [0.6567-0.7958] | 0.0355 | 0.686  | 0.516  | 0.4053 | 0.701  | 1.1275 | 0.6373 | 0.7647 | 0.7303 | 0.6783 |
| Zscore_PCC_KW_13_RF      | 0.8061 [0.7471-0.8651] | 0.0301 | 0.7964 | 0.465  | 0.472  | 0.7353 | 0.9216 | 0.7745 | 0.6961 | 0.7182 | 0.7553 |
| Zscore_PCC_KW_13_LR      | 0.8303 [0.7753-0.8853] | 0.0281 | 0.8229 | 0.533  | 0.532  | 0.7647 | 1.098  | 0.7157 | 0.8137 | 0.7935 | 0.7411 |
| Zscore_PCC_KW_13_LRLasso | 0.816 [0.7582-0.8738]  | 0.0295 | 0.7971 | 0.4042 | 0.5345 | 0.7647 | 0.8627 | 0.8333 | 0.6961 | 0.7328 | 0.8068 |
| Zscore_PCC_KW_13_AB      | 0.7462 [0.6783-0.8140] | 0.0346 | 0.6744 | 0.4978 | 0.425  | 0.7108 | 0.8725 | 0.7745 | 0.6471 | 0.687  | 0.7416 |
| Zscore_PCC_KW_13_DT      | 0.6863 [0.6224-0.7501] | 0.0326 | 0.7632 | 1      | 0.3732 | 0.6863 | 1.0588 | 0.6569 | 0.7157 | 0.6979 | 0.6759 |
| Zscore_PCC_KW_13_GP      | 0.792 [0.7298-0.8542]  | 0.0317 | 0.7727 | 0.5001 | 0.5303 | 0.7647 | 1.0588 | 0.7353 | 0.7941 | 0.7812 | 0.75   |
| Zscore_PCC_KW_13_NB      | 0.7533 [0.6866-0.8199] | 0.034  | 0.7455 | 1      | 0.4709 | 0.7304 | 1.2059 | 0.6275 | 0.8333 | 0.7901 | 0.6911 |
| Zscore_PCC_KW_14_SVM     | 0.822 [0.7640-0.8800]  | 0.0296 | 0.7608 | 0.5    | 0.5392 | 0.7696 | 1.0098 | 0.7647 | 0.7745 | 0.7723 | 0.767  |
| Zscore_PCC_KW_14_LDA     | 0.8071 [0.7468-0.8674] | 0.0308 | 0.7397 | 0.4895 | 0.5295 | 0.7647 | 1.0196 | 0.7549 | 0.7745 | 0.77   | 0.7596 |
| Zscore_PCC_KW_14_AE      | 0.755 [0.6885-0.8215]  | 0.0339 | 0.7138 | 0.6492 | 0.4183 | 0.7059 | 1.1765 | 0.6176 | 0.7941 | 0.75   | 0.675  |
| Zscore_PCC_KW_14_RF      | 0.805 [0.7458-0.8642]  | 0.0302 | 0.8055 | 0.445  | 0.4832 | 0.7402 | 0.8922 | 0.7941 | 0.6863 | 0.7168 | 0.7692 |
| Zscore_PCC_KW_14_LR      | 0.8175 [0.7594-0.8755] | 0.0296 | 0.7672 | 0.3916 | 0.5227 | 0.7598 | 0.8922 | 0.8137 | 0.7059 | 0.7345 | 0.7912 |
| Zscore_PCC_KW_14_LRLasso | 0.8176 [0.7598-0.8753] | 0.0295 | 0.7836 | 0.4098 | 0.5239 | 0.7598 | 0.8725 | 0.8235 | 0.6961 | 0.7304 | 0.7978 |
| Zscore_PCC_KW_14_AB      | 0.7609 [0.6951-0.8267] | 0.0336 | 0.7197 | 0.489  | 0.4719 | 0.7255 | 0.7059 | 0.8725 | 0.5784 | 0.6742 | 0.8194 |
| Zscore_PCC_KW_14_DT      | 0.6569 [0.5914-0.7223] | 0.0334 | 0.7418 | 1      | 0.3138 | 0.6569 | 1.0196 | 0.6471 | 0.6667 | 0.66   | 0.6538 |
| Zscore_PCC_KW_14_GP      | 0.7913 [0.7297-0.8530] | 0.0315 | 0.7851 | 0.5089 | 0.5162 | 0.7549 | 1.1569 | 0.6765 | 0.8333 | 0.8023 | 0.7203 |
| Zscore_PCC_KW_14_NB      | 0.7375 [0.6684-0.8066] | 0.0352 | 0.6993 | 1      | 0.446  | 0.7206 | 1.1471 | 0.6471 | 0.7941 | 0.7586 | 0.6923 |
| Zscore_PCC_KW_15_SVM     | 0.8272 [0.7706-0.8838] | 0.0289 | 0.7728 | 0.4368 | 0.5405 | 0.7696 | 0.9314 | 0.8039 | 0.7353 | 0.7523 | 0.7895 |
| Zscore_PCC_KW_15_LDA     | 0.8156 [0.7565-0.8748] | 0.0302 | 0.7562 | 0.5117 | 0.5399 | 0.7696 | 1.049  | 0.7451 | 0.7941 | 0.7835 | 0.757  |
| Zscore_PCC_KW_15_AE      | 0.7339 [0.6640-0.8037] | 0.0356 | 0.6749 | 0.5503 | 0.4315 | 0.7157 | 0.9804 | 0.7255 | 0.7059 | 0.7115 | 0.72   |

|                          |                        |        |        |        |        |        |        |        |        |        |        |
|--------------------------|------------------------|--------|--------|--------|--------|--------|--------|--------|--------|--------|--------|
| Zscore_PCC_KW_15_RF      | 0.8062 [0.7474-0.8650] | 0.03   | 0.8107 | 0.41   | 0.498  | 0.7451 | 0.8235 | 0.8333 | 0.6569 | 0.7083 | 0.7976 |
| Zscore_PCC_KW_15_LR      | 0.8211 [0.7639-0.8784] | 0.0292 | 0.771  | 0.5166 | 0.5208 | 0.7598 | 1.0686 | 0.7255 | 0.7941 | 0.7789 | 0.7431 |
| Zscore_PCC_KW_15_LRLasso | 0.8172 [0.7593-0.8751] | 0.0296 | 0.7796 | 0.4057 | 0.5253 | 0.7598 | 0.8529 | 0.8333 | 0.6863 | 0.7265 | 0.8046 |
| Zscore_PCC_KW_15_AB      | 0.7266 [0.6569-0.7962] | 0.0355 | 0.6629 | 0.4912 | 0.4016 | 0.6961 | 0.7843 | 0.8039 | 0.5882 | 0.6613 | 0.75   |
| Zscore_PCC_KW_15_DT      | 0.6569 [0.5921-0.7216] | 0.0331 | 0.738  | 1      | 0.3167 | 0.6569 | 1.1373 | 0.5882 | 0.7255 | 0.6818 | 0.6379 |
| Zscore_PCC_KW_15_GP      | 0.8035 [0.7436-0.8635] | 0.0306 | 0.802  | 0.5286 | 0.5245 | 0.7549 | 1.2353 | 0.6373 | 0.8725 | 0.8333 | 0.7063 |
| Zscore_PCC_KW_15_NB      | 0.7424 [0.6740-0.8109] | 0.0349 | 0.7027 | 1      | 0.446  | 0.7206 | 1.1471 | 0.6471 | 0.7941 | 0.7586 | 0.6923 |
| Zscore_PCC_KW_16_SVM     | 0.8299 [0.7740-0.8858] | 0.0285 | 0.7802 | 0.4765 | 0.5392 | 0.7696 | 0.9902 | 0.7745 | 0.7647 | 0.767  | 0.7723 |
| Zscore_PCC_KW_16_LDA     | 0.819 [0.7593-0.8787]  | 0.0305 | 0.7419 | 0.4099 | 0.5791 | 0.7892 | 0.951  | 0.8137 | 0.7647 | 0.7757 | 0.8041 |
| Zscore_PCC_KW_16_AE      | 0.7324 [0.6632-0.8016] | 0.0353 | 0.6904 | 0.4776 | 0.4138 | 0.7059 | 0.902  | 0.7549 | 0.6569 | 0.6875 | 0.7283 |
| Zscore_PCC_KW_16_RF      | 0.814 [0.7563-0.8716]  | 0.0294 | 0.8091 | 0.475  | 0.4906 | 0.7451 | 0.9608 | 0.7647 | 0.7255 | 0.7358 | 0.7551 |
| Zscore_PCC_KW_16_LR      | 0.8224 [0.7654-0.8794] | 0.0291 | 0.7728 | 0.4717 | 0.5196 | 0.7598 | 0.9902 | 0.7647 | 0.7549 | 0.7573 | 0.7624 |
| Zscore_PCC_KW_16_LRLasso | 0.8149 [0.7561-0.8737] | 0.03   | 0.7523 | 0.5123 | 0.5198 | 0.7598 | 1.0294 | 0.7451 | 0.7745 | 0.7677 | 0.7524 |
| Zscore_PCC_KW_16_AB      | 0.775 [0.7101-0.8400]  | 0.0331 | 0.7136 | 0.5058 | 0.5202 | 0.7598 | 0.951  | 0.7843 | 0.7353 | 0.7477 | 0.7732 |
| Zscore_PCC_KW_16_DT      | 0.701 [0.6378-0.7641]  | 0.0322 | 0.7755 | 1      | 0.402  | 0.701  | 1.0098 | 0.6961 | 0.7059 | 0.703  | 0.699  |
| Zscore_PCC_KW_16_GP      | 0.8076 [0.7484-0.8667] | 0.0302 | 0.8063 | 0.504  | 0.5331 | 0.7647 | 1.1176 | 0.7059 | 0.8235 | 0.8    | 0.7368 |
| Zscore_PCC_KW_16_NB      | 0.7387 [0.6701-0.8072] | 0.035  | 0.7032 | 1      | 0.4275 | 0.7108 | 1.1667 | 0.6275 | 0.7941 | 0.7529 | 0.6807 |
| Zscore_PCC_KW_17_SVM     | 0.8341 [0.7786-0.8896] | 0.0283 | 0.7864 | 0.4725 | 0.5785 | 0.7892 | 0.9902 | 0.7941 | 0.7843 | 0.7864 | 0.7921 |
| Zscore_PCC_KW_17_LDA     | 0.8198 [0.7603-0.8793] | 0.0304 | 0.7438 | 0.4642 | 0.5687 | 0.7843 | 1.0196 | 0.7745 | 0.7941 | 0.79   | 0.7788 |
| Zscore_PCC_KW_17_AE      | 0.7176 [0.6466-0.7886] | 0.0362 | 0.6612 | 0.5451 | 0.4125 | 0.7059 | 0.9412 | 0.7353 | 0.6765 | 0.6944 | 0.7188 |
| Zscore_PCC_KW_17_RF      | 0.8118 [0.7535-0.8702] | 0.0298 | 0.8106 | 0.38   | 0.5221 | 0.7549 | 0.7843 | 0.8627 | 0.6471 | 0.7097 | 0.825  |
| Zscore_PCC_KW_17_LR      | 0.8198 [0.7620-0.8776] | 0.0295 | 0.7689 | 0.6028 | 0.5227 | 0.7598 | 1.1078 | 0.7059 | 0.8137 | 0.7912 | 0.7345 |
| Zscore_PCC_KW_17_LRLasso | 0.8164 [0.7579-0.8750] | 0.0299 | 0.7623 | 0.5123 | 0.5394 | 0.7696 | 1.0294 | 0.7549 | 0.7843 | 0.7778 | 0.7619 |
| Zscore_PCC_KW_17_AB      | 0.7771 [0.7127-0.8414] | 0.0328 | 0.762  | 0.5053 | 0.4804 | 0.7402 | 1.0098 | 0.7353 | 0.7451 | 0.7426 | 0.7379 |
| Zscore_PCC_KW_17_DT      | 0.6667 [0.6018-0.7315] | 0.0331 | 0.7479 | 1      | 0.3339 | 0.6667 | 1.0588 | 0.6373 | 0.6961 | 0.6771 | 0.6574 |
| Zscore_PCC_KW_17_GP      | 0.8151 [0.7566-0.8735] | 0.0298 | 0.8065 | 0.5046 | 0.5621 | 0.7794 | 1.1078 | 0.7255 | 0.8333 | 0.8132 | 0.7522 |
| Zscore_PCC_KW_17_NB      | 0.7235 [0.6533-0.7936] | 0.0358 | 0.6896 | 1      | 0.4168 | 0.701  | 1.2647 | 0.5686 | 0.8333 | 0.7733 | 0.6589 |
| Zscore_PCC_KW_18_SVM     | 0.8319 [0.7759-0.8879] | 0.0286 | 0.7802 | 0.4804 | 0.5589 | 0.7794 | 1.0098 | 0.7745 | 0.7843 | 0.7822 | 0.7767 |
| Zscore_PCC_KW_18_LDA     | 0.8154 [0.7554-0.8753] | 0.0306 | 0.7454 | 0.5318 | 0.5704 | 0.7843 | 1.0784 | 0.7451 | 0.8235 | 0.8085 | 0.7636 |
| Zscore_PCC_KW_18_AE      | 0.6915 [0.6172-0.7657] | 0.0379 | 0.6083 | 0.465  | 0.3944 | 0.6912 | 0.7549 | 0.8137 | 0.5686 | 0.6535 | 0.7532 |
| Zscore_PCC_KW_18_RF      | 0.8184 [0.7618-0.8750] | 0.0289 | 0.8145 | 0.435  | 0.5114 | 0.7549 | 0.9216 | 0.7941 | 0.7157 | 0.7364 | 0.7766 |
| Zscore_PCC_KW_18_LR      | 0.8156 [0.7574-0.8739] | 0.0297 | 0.7661 | 0.5168 | 0.5303 | 0.7647 | 1.0588 | 0.7353 | 0.7941 | 0.7812 | 0.75   |
| Zscore_PCC_KW_18_LRLasso | 0.8156 [0.7570-0.8741] | 0.0299 | 0.7629 | 0.5598 | 0.5208 | 0.7598 | 1.0686 | 0.7255 | 0.7941 | 0.7789 | 0.7431 |
| Zscore_PCC_KW_18_AB      | 0.7473 [0.6798-0.8148] | 0.0344 | 0.7141 | 0.5013 | 0.4414 | 0.7206 | 0.9706 | 0.7353 | 0.7059 | 0.7143 | 0.7273 |
| Zscore_PCC_KW_18_DT      | 0.6814 [0.6171-0.7456] | 0.0328 | 0.7601 | 1      | 0.3629 | 0.6814 | 1.0294 | 0.6667 | 0.6961 | 0.6869 | 0.6762 |
| Zscore_PCC_KW_18_GP      | 0.8171 [0.7587-0.8755] | 0.0298 | 0.8033 | 0.5013 | 0.5595 | 0.7794 | 1.049  | 0.7549 | 0.8039 | 0.7938 | 0.7664 |
| Zscore_PCC_KW_18_NB      | 0.7231 [0.6529-0.7933] | 0.0358 | 0.6895 | 1      | 0.4078 | 0.6961 | 1.2745 | 0.5588 | 0.8333 | 0.7703 | 0.6538 |
| Zscore_PCC_KW_19_SVM     | 0.8105 [0.7496-0.8713] | 0.031  | 0.7411 | 0.4825 | 0.5785 | 0.7892 | 1.0098 | 0.7843 | 0.7941 | 0.7921 | 0.7864 |
| Zscore_PCC_KW_19_LDA     | 0.8162 [0.7560-0.8764] | 0.0307 | 0.7402 | 0.4222 | 0.5787 | 0.7892 | 0.9706 | 0.8039 | 0.7745 | 0.781  | 0.798  |
| Zscore_PCC_KW_19_AE      | 0.7357 [0.6666-0.8048] | 0.0353 | 0.7038 | 0.4754 | 0.4118 | 0.7059 | 1      | 0.7059 | 0.7059 | 0.7059 | 0.7059 |
| Zscore_PCC_KW_19_RF      | 0.8013 [0.7416-0.8611] | 0.0305 | 0.7998 | 0.47   | 0.5006 | 0.75   | 0.951  | 0.7745 | 0.7255 | 0.7383 | 0.7629 |
| Zscore_PCC_KW_19_LR      | 0.8023 [0.7411-0.8635] | 0.0312 | 0.7321 | 0.4345 | 0.5303 | 0.7647 | 0.9412 | 0.7941 | 0.7353 | 0.75   | 0.7812 |
| Zscore_PCC_KW_19_LRLasso | 0.8033 [0.7423-0.8644] | 0.0312 | 0.7344 | 0.4875 | 0.5196 | 0.7598 | 0.9902 | 0.7647 | 0.7549 | 0.7573 | 0.7624 |
| Zscore_PCC_KW_19_AB      | 0.7496 [0.6827-0.8165] | 0.0341 | 0.7166 | 0.5064 | 0.4024 | 0.701  | 1.049  | 0.6765 | 0.7255 | 0.7113 | 0.6916 |
| Zscore_PCC_KW_19_DT      | 0.6618 [0.5969-0.7266] | 0.0331 | 0.7426 | 1      | 0.3254 | 0.6618 | 1.1078 | 0.6078 | 0.7157 | 0.6813 | 0.646  |
| Zscore_PCC_KW_19_GP      | 0.8129 [0.7534-0.8724] | 0.0304 | 0.7907 | 0.5022 | 0.5887 | 0.7941 | 1.0392 | 0.7745 | 0.8137 | 0.8061 | 0.783  |
| Zscore_PCC_KW_19_NB      | 0.72 [0.6496-0.7904]   | 0.0359 | 0.6878 | 1      | 0.4248 | 0.701  | 1.3235 | 0.5392 | 0.8627 | 0.7971 | 0.6519 |
| Zscore_PCC_KW_20_SVM     | 0.8088 [0.7478-0.8698] | 0.0311 | 0.7403 | 0.4654 | 0.5595 | 0.7794 | 0.951  | 0.8039 | 0.7549 | 0.7664 | 0.7938 |
| Zscore_PCC_KW_20_LDA     | 0.8145 [0.7538-0.8752] | 0.031  | 0.734  | 0.507  | 0.5787 | 0.7892 | 1.0294 | 0.7745 | 0.8039 | 0.798  | 0.781  |
| Zscore_PCC_KW_20_AE      | 0.5978 [0.5195-0.6762] | 0.04   | 0.5466 | 0.5112 | 0.22   | 0.6078 | 0.8039 | 0.7059 | 0.5098 | 0.5902 | 0.6341 |
| Zscore_PCC_KW_20_RF      | 0.8126 [0.7550-0.8702] | 0.0294 | 0.8101 | 0.45   | 0.491  | 0.7451 | 0.9412 | 0.7745 | 0.7157 | 0.7315 | 0.7604 |
| Zscore_PCC_KW_20_LR      | 0.8001 [0.7386-0.8616] | 0.0314 | 0.7292 | 0.4496 | 0.5303 | 0.7647 | 0.9412 | 0.7941 | 0.7353 | 0.75   | 0.7812 |
| Zscore_PCC_KW_20_LRLasso | 0.8025 [0.7412-0.8638] | 0.0313 | 0.7333 | 0.4875 | 0.5198 | 0.7598 | 0.9706 | 0.7745 | 0.7451 | 0.7524 | 0.7677 |
| Zscore_PCC_KW_20_AB      | 0.7566 [0.6905-0.8228] | 0.0338 | 0.7199 | 0.4938 | 0.4291 | 0.7108 | 0.8137 | 0.8039 | 0.6176 | 0.6777 | 0.759  |
| Zscore_PCC_KW_20_DT      | 0.701 [0.6379-0.7641]  | 0.0322 | 0.7751 | 1      | 0.4021 | 0.701  | 1.0294 | 0.6863 | 0.7157 | 0.7071 | 0.6952 |
| Zscore_PCC_KW_20_GP      | 0.8104 [0.7505-0.8702] | 0.0305 | 0.7867 | 0.5017 | 0.5887 | 0.7941 | 1.0392 | 0.7745 | 0.8137 | 0.8061 | 0.783  |
| Zscore_PCC_KW_20_NB      | 0.7116 [0.6408-0.7825] | 0.0362 | 0.6749 | 1      | 0.3657 | 0.6814 | 1.1275 | 0.6176 | 0.7451 | 0.7079 | 0.6609 |
| Zscore_PCC_RFE_1_SVM     | 0.6352 [0.5580-0.7125] | 0.0394 | 0.5856 | 0.5237 | 0.3057 | 0.652  | 0.8922 | 0.7059 | 0.598  | 0.6372 | 0.6703 |
| Zscore_PCC_RFE_1_LDA     | 0.6302 [0.5527-0.7077] | 0.0395 | 0.5847 | 0.5483 | 0.2943 | 0.6471 | 0.9608 | 0.6667 | 0.6275 | 0.6415 | 0.6531 |
| Zscore_PCC_RFE_1_AE      | 0.6097 [0.5313-0.6880] | 0.04   | 0.5704 | 0.5263 | 0.2551 | 0.6275 | 0.9608 | 0.6471 | 0.6078 | 0.6226 | 0.6327 |
| Zscore_PCC_RFE_1_RF      | 0.5712 [0.4924-0.6500] | 0.0402 | 0.5958 | 0.96   | 0.1975 | 0.5784 | 1.6078 | 0.2745 | 0.8824 | 0.7    | 0.5488 |
| Zscore_PCC_RFE_1_LR      | 0.6338 [0.5565-0.7111] | 0.0394 | 0.5831 | 0.5358 | 0.2946 | 0.6471 | 0.9412 | 0.6765 | 0.6176 | 0.6389 | 0.6562 |
| Zscore_PCC_RFE_1_LRLasso | 0.6329 [0.5556-0.7103] | 0.0395 | 0.5838 | 0.5264 | 0.2962 | 0.6471 | 0.8824 | 0.7059 | 0.5882 | 0.6316 | 0.6667 |
| Zscore_PCC_RFE_1_AB      | 0.5735 [0.4947-0.6523] | 0.0402 | 0.5514 | 0.4974 | 0.1677 | 0.5784 | 0.6471 | 0.7549 | 0.402  | 0.558  | 0.6212 |
| Zscore_PCC_RFE_1_DT      | 0.5 [0.4310-0.5690]    | 0.0352 | 0.625  | 2      | 0      | 0.5    | 2      | 0      | 1      | 0      | 0.5    |
| Zscore_PCC_RFE_1_GP      | 0.6263 [0.5484-0.7042] | 0.0397 | 0.558  | 0.5875 | 0.2847 | 0.6422 | 1.049  | 0.6176 | 0.6667 | 0.6495 | 0.6355 |
| Zscore_PCC_RFE_1_NB      | 0.6092 [0.5304-0.6879] | 0.0402 | 0.5543 | 0.6382 | 0.2746 | 0.6373 | 0.9804 | 0.6471 | 0.6275 | 0.6346 | 0.64   |
| Zscore_PCC_RFE_2_SVM     | 0.733 [0.6647-0.8013]  | 0.0349 | 0.7015 | 0.6456 | 0.3723 | 0.6814 | 1.2255 | 0.5686 | 0.7941 | 0.7342 | 0.648  |
| Zscore_PCC_RFE_2_LDA     | 0.7211 [0.6508-0.7914] | 0.0359 | 0.67   | 0.5878 | 0.3824 | 0.6912 | 1.0098 | 0.6863 | 0.6961 | 0.6931 | 0.6893 |

|                          |                        |        |        |        |        |        |        |        |        |        |        |
|--------------------------|------------------------|--------|--------|--------|--------|--------|--------|--------|--------|--------|--------|
| Zscore_PCC_RFE_2_AE      | 0.7183 [0.6479-0.7887] | 0.0359 | 0.6787 | 0.4905 | 0.3834 | 0.6814 | 1.3235 | 0.5196 | 0.8431 | 0.7681 | 0.637  |
| Zscore_PCC_RFE_2_RF      | 0.6841 [0.6117-0.7566] | 0.037  | 0.6563 | 0.61   | 0.2867 | 0.6422 | 1.1275 | 0.5784 | 0.7059 | 0.6629 | 0.6261 |
| Zscore_PCC_RFE_2_LR      | 0.7319 [0.6634-0.8004] | 0.0349 | 0.694  | 0.6014 | 0.3744 | 0.6863 | 1.098  | 0.6373 | 0.7353 | 0.7065 | 0.6696 |
| Zscore_PCC_RFE_2_LRLasso | 0.7301 [0.6613-0.7989] | 0.0351 | 0.6912 | 0.6078 | 0.3744 | 0.6863 | 1.098  | 0.6373 | 0.7353 | 0.7065 | 0.6696 |
| Zscore_PCC_RFE_2_AB      | 0.6724 [0.5989-0.7459] | 0.0375 | 0.6421 | 0.4917 | 0.3043 | 0.6373 | 0.5686 | 0.8529 | 0.4216 | 0.5959 | 0.7414 |
| Zscore_PCC_RFE_2_DT      | 0.6078 [0.5406-0.6751] | 0.0343 | 0.7087 | 1      | 0.2159 | 0.6078 | 0.9608 | 0.6275 | 0.5882 | 0.6038 | 0.6122 |
| Zscore_PCC_RFE_2_GP      | 0.7273 [0.6576-0.7970] | 0.0356 | 0.7128 | 0.5821 | 0.3959 | 0.6961 | 1.1373 | 0.6275 | 0.7647 | 0.7273 | 0.6724 |
| Zscore_PCC_RFE_2_NB      | 0.7019 [0.6293-0.7746] | 0.0371 | 0.6409 | 0.745  | 0.3649 | 0.6814 | 1.1078 | 0.6275 | 0.7353 | 0.7033 | 0.6637 |
| Zscore_PCC_RFE_3_SVM     | 0.8219 [0.7663-0.8775] | 0.0283 | 0.8371 | 0.5785 | 0.5041 | 0.75   | 1.1275 | 0.6863 | 0.8137 | 0.7865 | 0.7217 |
| Zscore_PCC_RFE_3_LDA     | 0.8231 [0.7680-0.8783] | 0.0281 | 0.8472 | 0.6695 | 0.4931 | 0.7402 | 1.2255 | 0.6275 | 0.8529 | 0.8101 | 0.696  |
| Zscore_PCC_RFE_3_AE      | 0.7678 [0.7016-0.8339] | 0.0338 | 0.8166 | 0.4852 | 0.4709 | 0.7304 | 1.2059 | 0.6275 | 0.8333 | 0.7901 | 0.6911 |
| Zscore_PCC_RFE_3_RF      | 0.7852 [0.7233-0.8471] | 0.0316 | 0.8175 | 0.545  | 0.4646 | 0.7304 | 1.1275 | 0.6667 | 0.7941 | 0.764  | 0.7043 |
| Zscore_PCC_RFE_3_LR      | 0.8223 [0.7666-0.8779] | 0.0284 | 0.8373 | 0.6024 | 0.5162 | 0.7549 | 1.1569 | 0.6765 | 0.8333 | 0.8023 | 0.7203 |
| Zscore_PCC_RFE_3_LRLasso | 0.8217 [0.7660-0.8775] | 0.0284 | 0.8376 | 0.6065 | 0.5071 | 0.75   | 1.1667 | 0.6667 | 0.8333 | 0.8    | 0.7143 |
| Zscore_PCC_RFE_3_AB      | 0.7344 [0.6671-0.8017] | 0.0343 | 0.739  | 0.5081 | 0.3907 | 0.6912 | 1.2059 | 0.5882 | 0.7941 | 0.7407 | 0.6585 |
| Zscore_PCC_RFE_3_DT      | 0.6814 [0.6172-0.7455] | 0.0327 | 0.7629 | 1      | 0.3632 | 0.6814 | 0.951  | 0.7059 | 0.6569 | 0.6729 | 0.6907 |
| Zscore_PCC_RFE_3_GP      | 0.8104 [0.7514-0.8693] | 0.0301 | 0.8357 | 0.5057 | 0.5107 | 0.7549 | 1.0588 | 0.7255 | 0.7843 | 0.7708 | 0.7407 |
| Zscore_PCC_RFE_3_NB      | 0.7839 [0.7225-0.8453] | 0.0313 | 0.7989 | 0.7444 | 0.4368 | 0.7157 | 1.1569 | 0.6373 | 0.7941 | 0.7558 | 0.6864 |
| Zscore_PCC_RFE_4_SVM     | 0.8281 [0.7727-0.8836] | 0.0283 | 0.8212 | 0.5474 | 0.5413 | 0.7696 | 1.0882 | 0.7255 | 0.8137 | 0.7957 | 0.7477 |
| Zscore_PCC_RFE_4_LDA     | 0.8362 [0.7828-0.8897] | 0.0273 | 0.8421 | 0.5949 | 0.5253 | 0.7598 | 1.1471 | 0.6863 | 0.8333 | 0.8046 | 0.7265 |
| Zscore_PCC_RFE_4_AE      | 0.7618 [0.6958-0.8279] | 0.0337 | 0.7063 | 0.4629 | 0.4317 | 0.7157 | 0.9608 | 0.7353 | 0.6961 | 0.7075 | 0.7245 |
| Zscore_PCC_RFE_4_RF      | 0.8095 [0.7525-0.8665] | 0.0291 | 0.8273 | 0.48   | 0.4608 | 0.7304 | 0.9902 | 0.7353 | 0.7255 | 0.7282 | 0.7327 |
| Zscore_PCC_RFE_4_LR      | 0.8302 [0.7751-0.8852] | 0.0281 | 0.8223 | 0.5825 | 0.5436 | 0.7696 | 1.1275 | 0.7059 | 0.8333 | 0.809  | 0.7391 |
| Zscore_PCC_RFE_4_LRLasso | 0.8293 [0.7742-0.8844] | 0.0281 | 0.8224 | 0.584  | 0.5436 | 0.7696 | 1.1275 | 0.7059 | 0.8333 | 0.809  | 0.7391 |
| Zscore_PCC_RFE_4_AB      | 0.7856 [0.7243-0.8469] | 0.0313 | 0.7678 | 0.4929 | 0.4513 | 0.7157 | 0.7059 | 0.8627 | 0.5686 | 0.6667 | 0.8056 |
| Zscore_PCC_RFE_4_DT      | 0.6569 [0.5914-0.7223] | 0.0334 | 0.7418 | 1      | 0.3138 | 0.6569 | 1.0196 | 0.6471 | 0.6667 | 0.66   | 0.6538 |
| Zscore_PCC_RFE_4_GP      | 0.8159 [0.7585-0.8734] | 0.0293 | 0.8235 | 0.5298 | 0.5345 | 0.7647 | 1.1373 | 0.6961 | 0.8333 | 0.8068 | 0.7328 |
| Zscore_PCC_RFE_4_NB      | 0.7883 [0.7267-0.8498] | 0.0314 | 0.8006 | 0.5102 | 0.464  | 0.7255 | 0.7647 | 0.8431 | 0.6078 | 0.6825 | 0.7949 |
| Zscore_PCC_RFE_5_SVM     | 0.8202 [0.7640-0.8765] | 0.0287 | 0.8204 | 0.5603 | 0.5041 | 0.75   | 1.1275 | 0.6863 | 0.8137 | 0.7865 | 0.7217 |
| Zscore_PCC_RFE_5_LDA     | 0.8283 [0.7735-0.8832] | 0.028  | 0.8298 | 0.5908 | 0.5147 | 0.7549 | 1.1373 | 0.6863 | 0.8235 | 0.7955 | 0.7241 |
| Zscore_PCC_RFE_5_AE      | 0.7893 [0.7279-0.8508] | 0.0314 | 0.7915 | 0.4775 | 0.5    | 0.75   | 1.0098 | 0.7451 | 0.7549 | 0.7525 | 0.7476 |
| Zscore_PCC_RFE_5_RF      | 0.8017 [0.7431-0.8603] | 0.0299 | 0.8171 | 0.685  | 0.4543 | 0.7157 | 1.3137 | 0.5588 | 0.8725 | 0.8143 | 0.6642 |
| Zscore_PCC_RFE_5_LR      | 0.825 [0.7694-0.8806]  | 0.0284 | 0.8205 | 0.6007 | 0.5253 | 0.7598 | 1.1471 | 0.6863 | 0.8333 | 0.8046 | 0.7265 |
| Zscore_PCC_RFE_5_LRLasso | 0.8232 [0.7674-0.8791] | 0.0285 | 0.8171 | 0.57   | 0.5227 | 0.7598 | 1.1078 | 0.7059 | 0.8137 | 0.7912 | 0.7345 |
| Zscore_PCC_RFE_5_AB      | 0.7578 [0.6934-0.8223] | 0.0329 | 0.7625 | 0.492  | 0.4078 | 0.6961 | 0.7255 | 0.8333 | 0.5588 | 0.6538 | 0.7703 |
| Zscore_PCC_RFE_5_DT      | 0.701 [0.6383-0.7637]  | 0.032  | 0.7744 | 1      | 0.4043 | 0.701  | 1.1078 | 0.6471 | 0.7549 | 0.7253 | 0.6814 |
| Zscore_PCC_RFE_5_GP      | 0.8011 [0.7412-0.8610] | 0.0306 | 0.8102 | 0.5143 | 0.5134 | 0.7549 | 1.1176 | 0.6961 | 0.8137 | 0.7889 | 0.7281 |
| Zscore_PCC_RFE_5_NB      | 0.7768 [0.7134-0.8402] | 0.0323 | 0.7691 | 0.653  | 0.4626 | 0.7304 | 0.9118 | 0.7745 | 0.6863 | 0.7117 | 0.7527 |
| Zscore_PCC_RFE_6_SVM     | 0.8278 [0.7726-0.8829] | 0.0282 | 0.8204 | 0.5    | 0.5295 | 0.7647 | 1.0196 | 0.7549 | 0.7745 | 0.77   | 0.7596 |
| Zscore_PCC_RFE_6_LDA     | 0.8255 [0.7697-0.8814] | 0.0285 | 0.798  | 0.5226 | 0.5303 | 0.7647 | 1.0588 | 0.7353 | 0.7941 | 0.7812 | 0.75   |
| Zscore_PCC_RFE_6_AE      | 0.7559 [0.6903-0.8214] | 0.0334 | 0.7499 | 0.4775 | 0.424  | 0.7108 | 1.1078 | 0.6569 | 0.7647 | 0.7363 | 0.6903 |
| Zscore_PCC_RFE_6_RF      | 0.8142 [0.7576-0.8708] | 0.0289 | 0.8195 | 0.63   | 0.4709 | 0.7304 | 1.2059 | 0.6275 | 0.8333 | 0.7901 | 0.6911 |
| Zscore_PCC_RFE_6_LR      | 0.8251 [0.7697-0.8804] | 0.0282 | 0.8217 | 0.5232 | 0.5303 | 0.7647 | 1.0588 | 0.7353 | 0.7941 | 0.7812 | 0.75   |
| Zscore_PCC_RFE_6_LRLasso | 0.8207 [0.7647-0.8768] | 0.0286 | 0.8169 | 0.5131 | 0.5202 | 0.7598 | 1.049  | 0.7353 | 0.7843 | 0.7732 | 0.7477 |
| Zscore_PCC_RFE_6_AB      | 0.7733 [0.7099-0.8368] | 0.0324 | 0.739  | 0.5013 | 0.4221 | 0.7108 | 1.049  | 0.6863 | 0.7353 | 0.7216 | 0.7009 |
| Zscore_PCC_RFE_6_DT      | 0.7108 [0.6487-0.7729] | 0.0317 | 0.7823 | 1      | 0.424  | 0.7108 | 1.1078 | 0.6569 | 0.7647 | 0.7363 | 0.6903 |
| Zscore_PCC_RFE_6_GP      | 0.8092 [0.7506-0.8678] | 0.0299 | 0.8049 | 0.514  | 0.5405 | 0.7696 | 1.0686 | 0.7353 | 0.8039 | 0.7895 | 0.7523 |
| Zscore_PCC_RFE_6_NB      | 0.7851 [0.7234-0.8468] | 0.0315 | 0.7993 | 0.9169 | 0.4778 | 0.7304 | 1.2647 | 0.598  | 0.8627 | 0.8133 | 0.6822 |
| Zscore_PCC_RFE_7_SVM     | 0.8236 [0.7679-0.8794] | 0.0284 | 0.821  | 0.5076 | 0.5099 | 0.7549 | 1.0196 | 0.7451 | 0.7647 | 0.76   | 0.75   |
| Zscore_PCC_RFE_7_LDA     | 0.8262 [0.7704-0.8820] | 0.0285 | 0.8082 | 0.491  | 0.5394 | 0.7696 | 1.0294 | 0.7549 | 0.7843 | 0.7778 | 0.7619 |
| Zscore_PCC_RFE_7_AE      | 0.767 [0.7011-0.8330]  | 0.0336 | 0.7313 | 0.5677 | 0.4511 | 0.7255 | 1.0196 | 0.7157 | 0.7353 | 0.73   | 0.7212 |
| Zscore_PCC_RFE_7_RF      | 0.8281 [0.7741-0.8822] | 0.0276 | 0.8366 | 0.445  | 0.5041 | 0.75   | 0.8725 | 0.8137 | 0.6863 | 0.7217 | 0.7865 |
| Zscore_PCC_RFE_7_LR      | 0.8234 [0.7676-0.8793] | 0.0285 | 0.8198 | 0.5481 | 0.5208 | 0.7598 | 1.0686 | 0.7255 | 0.7941 | 0.7789 | 0.7431 |
| Zscore_PCC_RFE_7_LRLasso | 0.8156 [0.7584-0.8727] | 0.0292 | 0.7965 | 0.5318 | 0.5102 | 0.7549 | 1.0392 | 0.7353 | 0.7745 | 0.7653 | 0.7453 |
| Zscore_PCC_RFE_7_AB      | 0.7866 [0.7245-0.8488] | 0.0317 | 0.759  | 0.5076 | 0.4889 | 0.7402 | 1.1863 | 0.6471 | 0.8333 | 0.7952 | 0.7025 |
| Zscore_PCC_RFE_7_DT      | 0.6863 [0.6223-0.7503] | 0.0326 | 0.7647 | 1      | 0.3725 | 0.6863 | 1      | 0.6863 | 0.6863 | 0.6863 | 0.6863 |
| Zscore_PCC_RFE_7_GP      | 0.8067 [0.7475-0.8659] | 0.0302 | 0.8026 | 0.5155 | 0.5507 | 0.7745 | 1.0784 | 0.7353 | 0.8137 | 0.7979 | 0.7545 |
| Zscore_PCC_RFE_7_NB      | 0.7838 [0.7217-0.8460] | 0.0317 | 0.7869 | 0.9608 | 0.486  | 0.7255 | 1.3725 | 0.5392 | 0.9118 | 0.8594 | 0.6643 |
| Zscore_PCC_RFE_8_SVM     | 0.8234 [0.7676-0.8793] | 0.0285 | 0.8239 | 0.5856 | 0.5134 | 0.7549 | 1.1176 | 0.6961 | 0.8137 | 0.7889 | 0.7281 |
| Zscore_PCC_RFE_8_LDA     | 0.8058 [0.7456-0.8661] | 0.0307 | 0.7488 | 0.5496 | 0.5529 | 0.7745 | 1.1176 | 0.7157 | 0.8333 | 0.8111 | 0.7456 |
| Zscore_PCC_RFE_8_AE      | 0.6648 [0.5884-0.7413] | 0.039  | 0.5921 | 0.491  | 0.3693 | 0.6765 | 0.7059 | 0.8235 | 0.5294 | 0.6364 | 0.75   |
| Zscore_PCC_RFE_8_RF      | 0.8133 [0.7566-0.8700] | 0.0289 | 0.817  | 0.46   | 0.4926 | 0.7451 | 0.902  | 0.7941 | 0.6961 | 0.7232 | 0.7717 |
| Zscore_PCC_RFE_8_LR      | 0.8175 [0.7605-0.8745] | 0.0291 | 0.8119 | 0.5327 | 0.5114 | 0.7549 | 1.0784 | 0.7157 | 0.7941 | 0.7766 | 0.7364 |
| Zscore_PCC_RFE_8_LRLasso | 0.8081 [0.7494-0.8667] | 0.0299 | 0.7871 | 0.5215 | 0.5006 | 0.75   | 1.049  | 0.7255 | 0.7745 | 0.7629 | 0.7383 |
| Zscore_PCC_RFE_8_AB      | 0.7969 [0.7367-0.8570] | 0.0307 | 0.788  | 0.508  | 0.4673 | 0.7304 | 1.1667 | 0.6471 | 0.8137 | 0.7765 | 0.6975 |
| Zscore_PCC_RFE_8_DT      | 0.6667 [0.6018-0.7315] | 0.0331 | 0.7527 | 1      | 0.3339 | 0.6667 | 0.9412 | 0.6961 | 0.6373 | 0.6574 | 0.6771 |
| Zscore_PCC_RFE_8_GP      | 0.795 [0.7334-0.8565]  | 0.0314 | 0.784  | 0.5329 | 0.5424 | 0.7696 | 1.1078 | 0.7157 | 0.8235 | 0.8022 | 0.7434 |
| Zscore_PCC_RFE_8_NB      | 0.7883 [0.7265-0.8500] | 0.0315 | 0.7944 | 0.9354 | 0.4819 | 0.7353 | 1.2157 | 0.6275 | 0.8431 | 0.8    | 0.6935 |
| Zscore_PCC_RFE_9_SVM     | 0.8224 [0.7665-0.8783] | 0.0285 | 0.8212 | 0.4    | 0.5071 | 0.75   | 0.8333 | 0.8333 | 0.6667 | 0.7143 | 0.8    |

|                           |        |                 |        |        |        |        |        |        |        |        |        |        |
|---------------------------|--------|-----------------|--------|--------|--------|--------|--------|--------|--------|--------|--------|--------|
| Zscore_PCC_RFE_9_LDA      | 0.8063 | [0.7463-0.8663] | 0.0306 | 0.7522 | 0.5488 | 0.532  | 0.7647 | 1.098  | 0.7157 | 0.8137 | 0.7935 | 0.7411 |
| Zscore_PCC_RFE_9_AE       | 0.7049 | [0.6321-0.7778] | 0.0372 | 0.6855 | 0.4987 | 0.4327 | 0.7108 | 1.2255 | 0.598  | 0.8235 | 0.7722 | 0.672  |
| Zscore_PCC_RFE_9_RF       | 0.8154 | [0.7586-0.8722] | 0.029  | 0.8182 | 0.53   | 0.5002 | 0.75   | 1.0294 | 0.7353 | 0.7647 | 0.7576 | 0.7429 |
| Zscore_PCC_RFE_9_LR       | 0.8157 | [0.7584-0.8731] | 0.0292 | 0.8009 | 0.5999 | 0.5029 | 0.75   | 1.1078 | 0.6961 | 0.8039 | 0.7802 | 0.7257 |
| Zscore_PCC_RFE_9_LRLasso  | 0.8073 | [0.7485-0.8661] | 0.03   | 0.7848 | 0.5518 | 0.4926 | 0.7451 | 1.098  | 0.6961 | 0.7941 | 0.7717 | 0.7232 |
| Zscore_PCC_RFE_9_AB       | 0.7755 | [0.7116-0.8393] | 0.0326 | 0.7293 | 0.4994 | 0.451  | 0.7255 | 1      | 0.7255 | 0.7255 | 0.7255 | 0.7255 |
| Zscore_PCC_RFE_9_DT       | 0.6765 | [0.6120-0.7410] | 0.0329 | 0.7567 | 1      | 0.353  | 0.6765 | 1.0196 | 0.6667 | 0.6863 | 0.68   | 0.6731 |
| Zscore_PCC_RFE_9_GP       | 0.7911 | [0.7291-0.8531] | 0.0316 | 0.7875 | 0.5264 | 0.5331 | 0.7647 | 1.1176 | 0.7059 | 0.8235 | 0.8    | 0.7368 |
| Zscore_PCC_RFE_9_NB       | 0.781  | [0.7182-0.8439] | 0.0321 | 0.7781 | 0.9705 | 0.5098 | 0.7451 | 1.2745 | 0.6078 | 0.8824 | 0.8378 | 0.6923 |
| Zscore_PCC_RFE_10_SVM     | 0.8233 | [0.7675-0.8790] | 0.0284 | 0.8234 | 0.5965 | 0.5041 | 0.75   | 1.1275 | 0.6863 | 0.8137 | 0.7865 | 0.7217 |
| Zscore_PCC_RFE_10_LDA     | 0.807  | [0.7471-0.8669] | 0.0306 | 0.7506 | 0.5315 | 0.5303 | 0.7647 | 1.0588 | 0.7353 | 0.7941 | 0.7812 | 0.75   |
| Zscore_PCC_RFE_10_AE      | 0.758  | [0.6920-0.8239] | 0.0337 | 0.7255 | 0.5077 | 0.4118 | 0.7059 | 1      | 0.7059 | 0.7059 | 0.7059 | 0.7059 |
| Zscore_PCC_RFE_10_RF      | 0.8147 | [0.7572-0.8721] | 0.0293 | 0.8084 | 0.535  | 0.5107 | 0.7549 | 1.0588 | 0.7255 | 0.7843 | 0.7708 | 0.7407 |
| Zscore_PCC_RFE_10_LR      | 0.8128 | [0.7549-0.8706] | 0.0295 | 0.7968 | 0.5332 | 0.5012 | 0.75   | 1.0686 | 0.7157 | 0.7843 | 0.7684 | 0.7339 |
| Zscore_PCC_RFE_10_LRLasso | 0.8057 | [0.7467-0.8648] | 0.0301 | 0.7837 | 0.5317 | 0.491  | 0.7451 | 1.0588 | 0.7157 | 0.7745 | 0.7604 | 0.7315 |
| Zscore_PCC_RFE_10_AB      | 0.7809 | [0.7174-0.8444] | 0.0324 | 0.74   | 0.4974 | 0.4936 | 0.7451 | 0.8824 | 0.8039 | 0.6863 | 0.7193 | 0.7778 |
| Zscore_PCC_RFE_10_DT      | 0.6765 | [0.6121-0.7409] | 0.0329 | 0.7555 | 1      | 0.3536 | 0.6765 | 1.0588 | 0.6471 | 0.7059 | 0.6875 | 0.6667 |
| Zscore_PCC_RFE_10_GP      | 0.776  | [0.7126-0.8393] | 0.0323 | 0.774  | 0.5085 | 0.4815 | 0.7402 | 1.0686 | 0.7059 | 0.7745 | 0.7579 | 0.7248 |
| Zscore_PCC_RFE_10_NB      | 0.7827 | [0.7200-0.8453] | 0.032  | 0.7846 | 0.9755 | 0.5069 | 0.7451 | 1.2549 | 0.6176 | 0.8725 | 0.8289 | 0.6953 |
| Zscore_PCC_RFE_11_SVM     | 0.8124 | [0.7542-0.8706] | 0.0297 | 0.7998 | 0.4648 | 0.5208 | 0.7598 | 0.9314 | 0.7941 | 0.7255 | 0.7431 | 0.7789 |
| Zscore_PCC_RFE_11_LDA     | 0.8031 | [0.7426-0.8635] | 0.0308 | 0.7496 | 0.4948 | 0.5303 | 0.7647 | 1.0588 | 0.7353 | 0.7941 | 0.7812 | 0.75   |
| Zscore_PCC_RFE_11_AE      | 0.7314 | [0.6622-0.8007] | 0.0354 | 0.7106 | 0.536  | 0.4035 | 0.6961 | 0.7647 | 0.8137 | 0.5784 | 0.6587 | 0.7564 |
| Zscore_PCC_RFE_11_RF      | 0.8175 | [0.7605-0.8745] | 0.0291 | 0.809  | 0.525  | 0.4906 | 0.7451 | 1.0392 | 0.7255 | 0.7647 | 0.7551 | 0.7358 |
| Zscore_PCC_RFE_11_LR      | 0.7976 | [0.7359-0.8592] | 0.0315 | 0.7367 | 0.5381 | 0.5012 | 0.75   | 1.0686 | 0.7157 | 0.7843 | 0.7684 | 0.7339 |
| Zscore_PCC_RFE_11_LRLasso | 0.7961 | [0.7345-0.8578] | 0.0315 | 0.739  | 0.5175 | 0.5    | 0.75   | 1.0098 | 0.7451 | 0.7549 | 0.7525 | 0.7476 |
| Zscore_PCC_RFE_11_AB      | 0.8066 | [0.7483-0.8649] | 0.0297 | 0.8035 | 0.5254 | 0.4924 | 0.7353 | 1.2941 | 0.5882 | 0.8824 | 0.8333 | 0.6818 |
| Zscore_PCC_RFE_11_DT      | 0.6569 | [0.5917-0.7220] | 0.0332 | 0.7389 | 1      | 0.3152 | 0.6569 | 1.098  | 0.6078 | 0.7059 | 0.6739 | 0.6429 |
| Zscore_PCC_RFE_11_GP      | 0.7785 | [0.7155-0.8414] | 0.0321 | 0.7754 | 0.5038 | 0.4706 | 0.7353 | 1      | 0.7353 | 0.7353 | 0.7353 | 0.7353 |
| Zscore_PCC_RFE_11_NB      | 0.7771 | [0.7140-0.8402] | 0.0322 | 0.7826 | 0.972  | 0.4765 | 0.7353 | 1.1569 | 0.6569 | 0.8137 | 0.7791 | 0.7034 |
| Zscore_PCC_RFE_12_SVM     | 0.8145 | [0.7564-0.8726] | 0.0297 | 0.7889 | 0.4502 | 0.5102 | 0.7549 | 0.9608 | 0.7745 | 0.7353 | 0.7453 | 0.7653 |
| Zscore_PCC_RFE_12_LDA     | 0.7983 | [0.7372-0.8593] | 0.0312 | 0.7362 | 0.5227 | 0.4926 | 0.7451 | 1.098  | 0.6961 | 0.7941 | 0.7717 | 0.7232 |
| Zscore_PCC_RFE_12_AE      | 0.7714 | [0.7069-0.8360] | 0.0329 | 0.7596 | 0.5392 | 0.4511 | 0.7255 | 0.9804 | 0.7353 | 0.7157 | 0.7212 | 0.73   |
| Zscore_PCC_RFE_12_RF      | 0.802  | [0.7431-0.8610] | 0.0301 | 0.8008 | 0.415  | 0.4528 | 0.7206 | 0.7745 | 0.8333 | 0.6078 | 0.68   | 0.7848 |
| Zscore_PCC_RFE_12_LR      | 0.8013 | [0.7403-0.8623] | 0.0311 | 0.7385 | 0.4078 | 0.4823 | 0.7402 | 0.9118 | 0.7843 | 0.6961 | 0.7207 | 0.7634 |
| Zscore_PCC_RFE_12_LRLasso | 0.7962 | [0.7347-0.8578] | 0.0314 | 0.7324 | 0.4351 | 0.4815 | 0.7402 | 0.9314 | 0.7745 | 0.7059 | 0.7248 | 0.7579 |
| Zscore_PCC_RFE_12_AB      | 0.7967 | [0.7359-0.8575] | 0.031  | 0.7577 | 0.5056 | 0.4804 | 0.7402 | 0.9902 | 0.7451 | 0.7353 | 0.7379 | 0.7426 |
| Zscore_PCC_RFE_12_DT      | 0.6961 | [0.6327-0.7595] | 0.0324 | 0.7721 | 1      | 0.3922 | 0.6961 | 1      | 0.6961 | 0.6961 | 0.6961 | 0.6961 |
| Zscore_PCC_RFE_12_GP      | 0.7743 | [0.7106-0.8380] | 0.0325 | 0.7587 | 0.5046 | 0.4815 | 0.7402 | 1.0686 | 0.7059 | 0.7745 | 0.7579 | 0.7248 |
| Zscore_PCC_RFE_12_NB      | 0.7736 | [0.7103-0.8370] | 0.0323 | 0.784  | 0.9897 | 0.4551 | 0.7206 | 1.2451 | 0.598  | 0.8431 | 0.7922 | 0.6772 |
| Zscore_PCC_RFE_13_SVM     | 0.8218 | [0.7640-0.8796] | 0.0295 | 0.7844 | 0.4028 | 0.5529 | 0.7745 | 0.8824 | 0.8333 | 0.7157 | 0.7456 | 0.8111 |
| Zscore_PCC_RFE_13_LDA     | 0.8024 | [0.7417-0.8630] | 0.031  | 0.7432 | 0.3905 | 0.5002 | 0.75   | 0.9706 | 0.7647 | 0.7353 | 0.7429 | 0.7576 |
| Zscore_PCC_RFE_13_AE      | 0.7339 | [0.6653-0.8024] | 0.035  | 0.6961 | 0.4656 | 0.3744 | 0.6863 | 0.902  | 0.7353 | 0.6373 | 0.6696 | 0.7065 |
| Zscore_PCC_RFE_13_RF      | 0.8114 | [0.7533-0.8696] | 0.0297 | 0.8109 | 0.515  | 0.5198 | 0.7598 | 1.0294 | 0.7451 | 0.7745 | 0.7677 | 0.7524 |
| Zscore_PCC_RFE_13_LR      | 0.8021 | [0.7410-0.8632] | 0.0312 | 0.7554 | 0.4383 | 0.5298 | 0.7647 | 0.9608 | 0.7843 | 0.7451 | 0.7547 | 0.7755 |
| Zscore_PCC_RFE_13_LRLasso | 0.7988 | [0.7373-0.8604] | 0.0314 | 0.7396 | 0.4084 | 0.5331 | 0.7647 | 0.8824 | 0.8235 | 0.7059 | 0.7368 | 0.8    |
| Zscore_PCC_RFE_13_AB      | 0.7747 | [0.7106-0.8388] | 0.0327 | 0.7306 | 0.5025 | 0.4608 | 0.7304 | 0.9902 | 0.7353 | 0.7255 | 0.7282 | 0.7327 |
| Zscore_PCC_RFE_13_DT      | 0.7206 | [0.6588-0.7824] | 0.0315 | 0.79   | 1      | 0.4417 | 0.7206 | 1.049  | 0.6961 | 0.7451 | 0.732  | 0.7103 |
| Zscore_PCC_RFE_13_GP      | 0.7762 | [0.7124-0.8401] | 0.0326 | 0.7551 | 0.5038 | 0.5012 | 0.75   | 1.0686 | 0.7157 | 0.7843 | 0.7684 | 0.7339 |
| Zscore_PCC_RFE_13_NB      | 0.7711 | [0.7073-0.8350] | 0.0326 | 0.7681 | 0.9744 | 0.4765 | 0.7353 | 1.1569 | 0.6569 | 0.8137 | 0.7791 | 0.7034 |
| Zscore_PCC_RFE_14_SVM     | 0.8168 | [0.7579-0.8757] | 0.03   | 0.7715 | 0.4619 | 0.5295 | 0.7647 | 0.9804 | 0.7745 | 0.7549 | 0.7596 | 0.77   |
| Zscore_PCC_RFE_14_LDA     | 0.7983 | [0.7372-0.8595] | 0.0312 | 0.7383 | 0.69   | 0.4819 | 0.7353 | 1.2157 | 0.6275 | 0.8431 | 0.8    | 0.6935 |
| Zscore_PCC_RFE_14_AE      | 0.7265 | [0.6579-0.7952] | 0.035  | 0.7212 | 0.613  | 0.3546 | 0.6765 | 0.902  | 0.7255 | 0.6275 | 0.6607 | 0.6957 |
| Zscore_PCC_RFE_14_RF      | 0.8247 | [0.7689-0.8805] | 0.0285 | 0.8114 | 0.47   | 0.5413 | 0.7696 | 0.9118 | 0.8137 | 0.7255 | 0.7477 | 0.7957 |
| Zscore_PCC_RFE_14_LR      | 0.8068 | [0.7465-0.8672] | 0.0308 | 0.7682 | 0.419  | 0.531  | 0.7647 | 0.9216 | 0.8039 | 0.7255 | 0.7455 | 0.7872 |
| Zscore_PCC_RFE_14_LRLasso | 0.7995 | [0.7380-0.8610] | 0.0314 | 0.7449 | 0.4087 | 0.5331 | 0.7647 | 0.8824 | 0.8235 | 0.7059 | 0.7368 | 0.8    |
| Zscore_PCC_RFE_14_AB      | 0.7716 | [0.7077-0.8354] | 0.0326 | 0.7463 | 0.4989 | 0.4355 | 0.7157 | 0.8627 | 0.7843 | 0.6471 | 0.6897 | 0.75   |
| Zscore_PCC_RFE_14_DT      | 0.7108 | [0.6483-0.7733] | 0.0319 | 0.7826 | 1      | 0.4218 | 0.7108 | 1.0294 | 0.6961 | 0.7255 | 0.7172 | 0.7048 |
| Zscore_PCC_RFE_14_GP      | 0.7784 | [0.7145-0.8422] | 0.0326 | 0.7522 | 0.5215 | 0.5089 | 0.75   | 1.1863 | 0.6569 | 0.8431 | 0.8072 | 0.7107 |
| Zscore_PCC_RFE_14_NB      | 0.7681 | [0.7038-0.8324] | 0.0328 | 0.7724 | 0.9788 | 0.4553 | 0.7255 | 1.1373 | 0.6569 | 0.7941 | 0.7614 | 0.6983 |
| Zscore_PCC_RFE_15_SVM     | 0.7897 | [0.7270-0.8525] | 0.032  | 0.7221 | 0.4457 | 0.4815 | 0.7402 | 0.9314 | 0.7745 | 0.7059 | 0.7248 | 0.7579 |
| Zscore_PCC_RFE_15_LDA     | 0.7897 | [0.7275-0.8518] | 0.0317 | 0.7332 | 0.6074 | 0.4843 | 0.7402 | 1.1275 | 0.6765 | 0.8039 | 0.7753 | 0.713  |
| Zscore_PCC_RFE_15_AE      | 0.7809 | [0.7174-0.8443] | 0.0324 | 0.759  | 0.5288 | 0.4608 | 0.7304 | 1.0098 | 0.7255 | 0.7353 | 0.7327 | 0.7282 |
| Zscore_PCC_RFE_15_RF      | 0.8169 | [0.7603-0.8735] | 0.0289 | 0.8185 | 0.505  | 0.5002 | 0.75   | 1.0294 | 0.7353 | 0.7647 | 0.7576 | 0.7429 |
| Zscore_PCC_RFE_15_LR      | 0.7926 | [0.7302-0.8550] | 0.0318 | 0.7307 | 0.3974 | 0.4857 | 0.7402 | 0.8529 | 0.8137 | 0.6667 | 0.7094 | 0.7816 |
| Zscore_PCC_RFE_15_LRLasso | 0.7947 | [0.7329-0.8565] | 0.0315 | 0.7458 | 0.381  | 0.502  | 0.7451 | 0.7843 | 0.8529 | 0.6373 | 0.7016 | 0.8125 |
| Zscore_PCC_RFE_15_AB      | 0.7674 | [0.7029-0.8319] | 0.0329 | 0.7337 | 0.4981 | 0.4417 | 0.7206 | 0.951  | 0.7451 | 0.6961 | 0.7103 | 0.732  |
| Zscore_PCC_RFE_15_DT      | 0.7059 | [0.6431-0.7687] | 0.0321 | 0.7799 | 1      | 0.4118 | 0.7059 | 0.9804 | 0.7157 | 0.6961 | 0.7019 | 0.71   |
| Zscore_PCC_RFE_15_GP      | 0.7716 | [0.7071-0.8361] | 0.0329 | 0.7722 | 0.5022 | 0.491  | 0.7451 | 1.0588 | 0.7157 | 0.7745 | 0.7604 | 0.7315 |
| Zscore_PCC_RFE_15_NB      | 0.7724 | [0.7089-0.8359] | 0.0324 | 0.786  | 0.9868 | 0.469  | 0.7304 | 1.1863 | 0.6373 | 0.8235 | 0.7831 | 0.6942 |



|                             |                        |        |        |        |        |        |        |        |        |        |        |
|-----------------------------|------------------------|--------|--------|--------|--------|--------|--------|--------|--------|--------|--------|
| Zscore_PCC_RFE_16_SVM       | 0.7954 [0.7330-0.8577] | 0.0318 | 0.7255 | 0.4263 | 0.5029 | 0.75   | 0.8922 | 0.8039 | 0.6961 | 0.7257 | 0.7802 |
| Zscore_PCC_RFE_16_LDA       | 0.7921 [0.7301-0.8541] | 0.0316 | 0.7353 | 0.5882 | 0.4949 | 0.7451 | 1.1373 | 0.6765 | 0.8137 | 0.7841 | 0.7155 |
| Zscore_PCC_RFE_16_AE        | 0.776 [0.7119-0.8402]  | 0.0327 | 0.7458 | 0.4762 | 0.4613 | 0.7304 | 0.951  | 0.7549 | 0.7059 | 0.7196 | 0.7423 |
| Zscore_PCC_RFE_16_RF        | 0.8124 [0.7551-0.8698] | 0.0293 | 0.8137 | 0.545  | 0.4751 | 0.7353 | 1.1373 | 0.6667 | 0.8039 | 0.7727 | 0.7069 |
| Zscore_PCC_RFE_16_LR        | 0.7891 [0.7257-0.8525] | 0.0323 | 0.7142 | 0.3875 | 0.498  | 0.7451 | 0.8235 | 0.8333 | 0.6569 | 0.7083 | 0.7976 |
| Zscore_PCC_RFE_16_LRLasso   | 0.7945 [0.7320-0.8570] | 0.0319 | 0.7238 | 0.4777 | 0.4903 | 0.7451 | 0.9804 | 0.7549 | 0.7353 | 0.7404 | 0.75   |
| Zscore_PCC_RFE_16_AB        | 0.7596 [0.6940-0.8252] | 0.0335 | 0.7339 | 0.5203 | 0.4425 | 0.7108 | 1.3039 | 0.5588 | 0.8627 | 0.8028 | 0.6617 |
| Zscore_PCC_RFE_16_DT        | 0.7108 [0.6483-0.7733] | 0.0319 | 0.7829 | 1      | 0.4216 | 0.7108 | 1.0098 | 0.7059 | 0.7157 | 0.7129 | 0.7087 |
| Zscore_PCC_RFE_16_GP        | 0.7801 [0.7167-0.8435] | 0.0323 | 0.7802 | 0.5003 | 0.5102 | 0.7549 | 1.0392 | 0.7353 | 0.7745 | 0.7653 | 0.7453 |
| Zscore_PCC_RFE_16_NB        | 0.7588 [0.6931-0.8246] | 0.0336 | 0.7286 | 0.9841 | 0.4566 | 0.7255 | 1.1569 | 0.6471 | 0.8039 | 0.7674 | 0.6949 |
| Zscore_PCC_RFE_17_SVM       | 0.7967 [0.7348-0.8586] | 0.0316 | 0.7327 | 0.521  | 0.481  | 0.7402 | 1.049  | 0.7157 | 0.7647 | 0.7526 | 0.729  |
| Zscore_PCC_RFE_17_LDA       | 0.7911 [0.7293-0.8530] | 0.0315 | 0.7365 | 0.5808 | 0.4751 | 0.7353 | 1.1373 | 0.6667 | 0.8039 | 0.7727 | 0.7069 |
| Zscore_PCC_RFE_17_AE        | 0.7549 [0.6878-0.8220] | 0.0342 | 0.7151 | 0.5628 | 0.4321 | 0.7157 | 1.0588 | 0.6863 | 0.7451 | 0.7292 | 0.7037 |
| Zscore_PCC_RFE_17_RF        | 0.8079 [0.7490-0.8669] | 0.0301 | 0.8062 | 0.575  | 0.5162 | 0.7549 | 1.1569 | 0.6765 | 0.8333 | 0.8023 | 0.7203 |
| Zscore_PCC_RFE_17_LR        | 0.7861 [0.7226-0.8497] | 0.0324 | 0.714  | 0.3555 | 0.4842 | 0.7353 | 0.7647 | 0.8529 | 0.6176 | 0.6905 | 0.8077 |
| Zscore_PCC_RFE_17_LRLasso   | 0.797 [0.7350-0.8590]  | 0.0316 | 0.7273 | 0.4064 | 0.498  | 0.7451 | 0.8235 | 0.8333 | 0.6569 | 0.7083 | 0.7976 |
| Zscore_PCC_RFE_17_AB        | 0.7442 [0.6763-0.8122] | 0.0347 | 0.6957 | 0.5171 | 0.4183 | 0.7059 | 1.1765 | 0.6176 | 0.7941 | 0.75   | 0.675  |
| Zscore_PCC_RFE_17_DT        | 0.7108 [0.6484-0.7732] | 0.0319 | 0.7843 | 1      | 0.4221 | 0.7108 | 0.951  | 0.7353 | 0.6863 | 0.7009 | 0.7216 |
| Zscore_PCC_RFE_17_GP        | 0.7861 [0.7230-0.8493] | 0.0322 | 0.7875 | 0.5115 | 0.5333 | 0.7598 | 1.2255 | 0.6471 | 0.8725 | 0.8354 | 0.712  |
| Zscore_PCC_RFE_17_NB        | 0.7515 [0.6847-0.8183] | 0.0341 | 0.7129 | 0.9838 | 0.4344 | 0.7157 | 1.1176 | 0.6569 | 0.7745 | 0.7444 | 0.693  |
| Zscore_PCC_RFE_18_SVM       | 0.7858 [0.7226-0.8489] | 0.0322 | 0.7258 | 0.4546 | 0.4635 | 0.7304 | 0.8922 | 0.7843 | 0.6765 | 0.708  | 0.7582 |
| Zscore_PCC_RFE_18_LDA       | 0.782 [0.7190-0.8450]  | 0.0321 | 0.7329 | 0.5822 | 0.4626 | 0.7304 | 1.0882 | 0.6863 | 0.7745 | 0.7527 | 0.7117 |
| Zscore_PCC_RFE_18_AE        | 0.7642 [0.6995-0.8289] | 0.033  | 0.7695 | 0.5756 | 0.4258 | 0.7059 | 1.2549 | 0.5784 | 0.8333 | 0.7763 | 0.6641 |
| Zscore_PCC_RFE_18_RF        | 0.8061 [0.7476-0.8646] | 0.0298 | 0.8078 | 0.61   | 0.4781 | 0.7353 | 1.1765 | 0.6471 | 0.8235 | 0.7857 | 0.7    |
| Zscore_PCC_RFE_18_LR        | 0.7737 [0.7091-0.8384] | 0.033  | 0.7054 | 0.5597 | 0.4422 | 0.7206 | 1.0686 | 0.6863 | 0.7549 | 0.7368 | 0.7064 |
| Zscore_PCC_RFE_18_LRLasso   | 0.7824 [0.7189-0.8459] | 0.0324 | 0.7166 | 0.4385 | 0.4438 | 0.7206 | 0.8922 | 0.7745 | 0.6667 | 0.6991 | 0.7473 |
| Zscore_PCC_RFE_18_AB        | 0.7743 [0.7100-0.8386] | 0.0328 | 0.7315 | 0.503  | 0.4417 | 0.7206 | 0.951  | 0.7451 | 0.6961 | 0.7103 | 0.732  |
| Zscore_PCC_RFE_18_DT        | 0.652 [0.5863-0.7176]  | 0.0335 | 0.7405 | 1      | 0.3041 | 0.652  | 0.9706 | 0.6667 | 0.6373 | 0.6476 | 0.6566 |
| Zscore_PCC_RFE_18_GP        | 0.7954 [0.7340-0.8568] | 0.0313 | 0.7933 | 0.5047 | 0.5179 | 0.7549 | 1.1765 | 0.6667 | 0.8431 | 0.8095 | 0.7167 |
| Zscore_PCC_RFE_18_NB        | 0.7469 [0.6797-0.8142] | 0.0343 | 0.7081 | 0.9931 | 0.4291 | 0.7108 | 1.1863 | 0.6176 | 0.8039 | 0.759  | 0.6777 |
| Zscore_PCC_RFE_19_SVM       | 0.7779 [0.7131-0.8426] | 0.033  | 0.7163 | 0.5784 | 0.4673 | 0.7304 | 1.1667 | 0.6471 | 0.8137 | 0.7765 | 0.6975 |
| Zscore_PCC_RFE_19_LDA       | 0.7848 [0.7218-0.8478] | 0.0321 | 0.7335 | 0.5925 | 0.4949 | 0.7451 | 1.1373 | 0.6765 | 0.8137 | 0.7841 | 0.7155 |
| Zscore_PCC_RFE_19_AE        | 0.752 [0.6850-0.8191]  | 0.0342 | 0.6993 | 0.4599 | 0.4317 | 0.7157 | 0.9608 | 0.7353 | 0.6961 | 0.7075 | 0.7245 |
| Zscore_PCC_RFE_19_RF        | 0.818 [0.7613-0.8747]  | 0.0289 | 0.8252 | 0.59   | 0.4889 | 0.7402 | 1.1863 | 0.6471 | 0.8333 | 0.7952 | 0.7025 |
| Zscore_PCC_RFE_19_LR        | 0.7777 [0.7135-0.8418] | 0.0327 | 0.7113 | 0.6744 | 0.4528 | 0.7206 | 1.2255 | 0.6078 | 0.8333 | 0.7848 | 0.68   |
| Zscore_PCC_RFE_19_LRLasso   | 0.7859 [0.7226-0.8491] | 0.0322 | 0.7202 | 0.4242 | 0.4541 | 0.7255 | 0.8824 | 0.7843 | 0.6667 | 0.7018 | 0.7556 |
| Zscore_PCC_RFE_19_AB        | 0.7705 [0.7055-0.8354] | 0.0331 | 0.7202 | 0.5152 | 0.4658 | 0.7304 | 1.1471 | 0.6569 | 0.8039 | 0.7701 | 0.7009 |
| Zscore_PCC_RFE_19_DT        | 0.6422 [0.5761-0.7082] | 0.0337 | 0.7344 | 1      | 0.2847 | 0.6422 | 0.951  | 0.6667 | 0.6176 | 0.6355 | 0.6495 |
| Zscore_PCC_RFE_19_GP        | 0.8069 [0.7475-0.8663] | 0.0303 | 0.8138 | 0.5017 | 0.5303 | 0.7647 | 1.0588 | 0.7353 | 0.7941 | 0.7812 | 0.75   |
| Zscore_PCC_RFE_19_NB        | 0.7409 [0.6729-0.8088] | 0.0347 | 0.7001 | 0.9963 | 0.4108 | 0.701  | 1.2059 | 0.598  | 0.8039 | 0.7531 | 0.6667 |
| Zscore_PCC_RFE_20_SVM       | 0.8006 [0.7391-0.8621] | 0.0314 | 0.7345 | 0.4778 | 0.5006 | 0.75   | 0.951  | 0.7745 | 0.7255 | 0.7383 | 0.7629 |
| Zscore_PCC_RFE_20_LDA       | 0.7959 [0.7343-0.8576] | 0.0315 | 0.7437 | 0.5722 | 0.4926 | 0.7451 | 1.098  | 0.6961 | 0.7941 | 0.7717 | 0.7232 |
| Zscore_PCC_RFE_20_AE        | 0.7315 [0.6635-0.7996] | 0.0347 | 0.697  | 0.587  | 0.3834 | 0.6814 | 1.3235 | 0.5196 | 0.8431 | 0.7681 | 0.637  |
| Zscore_PCC_RFE_20_RF        | 0.8221 [0.7663-0.8779] | 0.0285 | 0.8306 | 0.555  | 0.5147 | 0.7549 | 1.1373 | 0.6863 | 0.8235 | 0.7955 | 0.7241 |
| Zscore_PCC_RFE_20_LR        | 0.7814 [0.7179-0.8450] | 0.0324 | 0.7147 | 0.653  | 0.4508 | 0.7206 | 1.2059 | 0.6176 | 0.8235 | 0.7778 | 0.6829 |
| Zscore_PCC_RFE_20_LRLasso   | 0.7934 [0.7315-0.8554] | 0.0316 | 0.7286 | 0.4196 | 0.4872 | 0.7402 | 0.8333 | 0.8235 | 0.6569 | 0.7059 | 0.7882 |
| Zscore_PCC_RFE_20_AB        | 0.7666 [0.7023-0.8310] | 0.0328 | 0.7376 | 0.5054 | 0.3925 | 0.6961 | 1.0392 | 0.6765 | 0.7157 | 0.7041 | 0.6887 |
| Zscore_PCC_RFE_20_DT        | 0.6176 [0.5507-0.6846] | 0.0342 | 0.7107 | 1      | 0.2355 | 0.6176 | 1.0392 | 0.598  | 0.6373 | 0.6224 | 0.6132 |
| Zscore_PCC_RFE_20_GP        | 0.8024 [0.7421-0.8627] | 0.0308 | 0.8015 | 0.5017 | 0.5303 | 0.7647 | 1.0588 | 0.7353 | 0.7941 | 0.7812 | 0.75   |
| Zscore_PCC_RFE_20_NB        | 0.7425 [0.6749-0.8101] | 0.0345 | 0.7035 | 0.9974 | 0.4035 | 0.6961 | 1.2353 | 0.5784 | 0.8137 | 0.7564 | 0.6587 |
| Zscore_PCC_Relief_1_SVM     | 0.5764 [0.4977-0.6551] | 0.0402 | 0.5861 | 0.438  | 0.2321 | 0.5833 | 0.3039 | 0.9314 | 0.2353 | 0.5491 | 0.7742 |
| Zscore_PCC_Relief_1_LDA     | 0.5639 [0.4849-0.6429] | 0.0403 | 0.5741 | 0.4258 | 0.2739 | 0.5882 | 0.2353 | 0.9706 | 0.2059 | 0.55   | 0.875  |
| Zscore_PCC_Relief_1_AE      | 0.4996 [0.4190-0.5802] | 0.0411 | 0.5404 | 0.5398 | 0.1511 | 0.5588 | 1.6275 | 0.2451 | 0.8725 | 0.6579 | 0.5361 |
| Zscore_PCC_Relief_1_RF      | 0.6287 [0.5524-0.7051] | 0.039  | 0.6349 | 0.325  | 0.2581 | 0.6275 | 0.8431 | 0.7059 | 0.549  | 0.6102 | 0.6512 |
| Zscore_PCC_Relief_1_LR      | 0.584 [0.5058-0.6622]  | 0.0399 | 0.5828 | 0.5316 | 0.1569 | 0.5784 | 1.0196 | 0.5686 | 0.5882 | 0.58   | 0.5769 |
| Zscore_PCC_Relief_1_LRLasso | 0.5811 [0.5029-0.6594] | 0.0399 | 0.585  | 0.5349 | 0.1569 | 0.5784 | 1.0196 | 0.5686 | 0.5882 | 0.58   | 0.5769 |
| Zscore_PCC_Relief_1_AB      | 0.6495 [0.5744-0.7245] | 0.0383 | 0.6082 | 0.4999 | 0.2353 | 0.6176 | 0.9804 | 0.6275 | 0.6078 | 0.6154 | 0.62   |
| Zscore_PCC_Relief_1_DT      | 0.5882 [0.5204-0.6561] | 0.0346 | 0.6896 | 1      | 0.1765 | 0.5882 | 1.0196 | 0.5784 | 0.598  | 0.59   | 0.5865 |
| Zscore_PCC_Relief_1_GP      | 0.5788 [0.5004-0.6572] | 0.04   | 0.5979 | 0.5015 | 0.1936 | 0.5882 | 0.5882 | 0.7941 | 0.3824 | 0.5625 | 0.65   |
| Zscore_PCC_Relief_1_NB      | 0.5566 [0.4769-0.6363] | 0.0407 | 0.5529 | 0.6356 | 0.1544 | 0.5735 | 0.6961 | 0.7255 | 0.4216 | 0.5564 | 0.6056 |
| Zscore_PCC_Relief_2_SVM     | 0.6616 [0.5875-0.7357] | 0.0378 | 0.6613 | 0.5253 | 0.255  | 0.6275 | 1.0196 | 0.6176 | 0.6373 | 0.63   | 0.625  |
| Zscore_PCC_Relief_2_LDA     | 0.6323 [0.5563-0.7082] | 0.0387 | 0.6365 | 0.5822 | 0.2856 | 0.6275 | 1.451  | 0.402  | 0.8529 | 0.7321 | 0.5878 |
| Zscore_PCC_Relief_2_AE      | 0.5422 [0.4621-0.6223] | 0.0409 | 0.5843 | 0.5009 | 0.2311 | 0.598  | 1.5294 | 0.3333 | 0.8627 | 0.7083 | 0.5641 |
| Zscore_PCC_Relief_2_RF      | 0.726 [0.6565-0.7955]  | 0.0355 | 0.6905 | 0.63   | 0.3815 | 0.6863 | 1.2157 | 0.5784 | 0.7941 | 0.7375 | 0.6532 |
| Zscore_PCC_Relief_2_LR      | 0.671 [0.5973-0.7447]  | 0.0376 | 0.6743 | 0.5334 | 0.2847 | 0.6422 | 1.049  | 0.6176 | 0.6667 | 0.6495 | 0.6355 |
| Zscore_PCC_Relief_2_LRLasso | 0.6729 [0.5994-0.7464] | 0.0375 | 0.6721 | 0.562  | 0.2894 | 0.6422 | 1.1863 | 0.549  | 0.7353 | 0.6747 | 0.6198 |
| Zscore_PCC_Relief_2_AB      | 0.6856 [0.6114-0.7599] | 0.0379 | 0.6129 | 0.5003 | 0.3737 | 0.6863 | 0.9216 | 0.7255 | 0.6471 | 0.6727 | 0.7021 |
| Zscore_PCC_Relief_2_DT      | 0.6471 [0.5815-0.7126] | 0.0334 | 0.741  | 1      | 0.2955 | 0.6471 | 0.902  | 0.6961 | 0.598  | 0.6339 | 0.663  |
| Zscore_PCC_Relief_2_GP      | 0.6595 [0.5847-0.7342] | 0.0381 | 0.6517 | 0.5092 | 0.3039 | 0.652  | 1.0098 | 0.6471 | 0.6569 | 0.6535 | 0.6505 |

|                             |                        |        |        |        |        |        |        |        |        |        |        |
|-----------------------------|------------------------|--------|--------|--------|--------|--------|--------|--------|--------|--------|--------|
| Zscore_PCC_Relief_2_NB      | 0.5815 [0.5032-0.6598] | 0.04   | 0.6104 | 0.9697 | 0.2157 | 0.5784 | 1.6863 | 0.2353 | 0.9216 | 0.75   | 0.5465 |
| Zscore_PCC_Relief_3_SVM     | 0.736 [0.6669-0.8051]  | 0.0353 | 0.7277 | 0.5543 | 0.4383 | 0.7157 | 1.1765 | 0.6275 | 0.8039 | 0.7619 | 0.6833 |
| Zscore_PCC_Relief_3_LDA     | 0.7345 [0.6651-0.8039] | 0.0354 | 0.7103 | 0.5747 | 0.4551 | 0.7206 | 1.2451 | 0.598  | 0.8431 | 0.7922 | 0.6772 |
| Zscore_PCC_Relief_3_AE      | 0.5312 [0.4514-0.6111] | 0.0408 | 0.5437 | 0.5065 | 0.1455 | 0.5588 | 1.5882 | 0.2647 | 0.8529 | 0.6429 | 0.537  |
| Zscore_PCC_Relief_3_RF      | 0.759 [0.6940-0.8240]  | 0.0332 | 0.7619 | 0.625  | 0.4327 | 0.7108 | 1.2255 | 0.598  | 0.8235 | 0.7722 | 0.672  |
| Zscore_PCC_Relief_3_LR      | 0.7436 [0.6752-0.8119] | 0.0349 | 0.7444 | 0.5758 | 0.4508 | 0.7206 | 1.2059 | 0.6176 | 0.8235 | 0.7778 | 0.6829 |
| Zscore_PCC_Relief_3_LRLasso | 0.7455 [0.6773-0.8137] | 0.0348 | 0.7436 | 0.5613 | 0.446  | 0.7206 | 1.1471 | 0.6471 | 0.7941 | 0.7586 | 0.6923 |
| Zscore_PCC_Relief_3_AB      | 0.7383 [0.6699-0.8067] | 0.0349 | 0.7026 | 0.5004 | 0.3922 | 0.6961 | 1      | 0.6961 | 0.6961 | 0.6961 | 0.6961 |
| Zscore_PCC_Relief_3_DT      | 0.6422 [0.5766-0.7077] | 0.0334 | 0.7395 | 1      | 0.2867 | 0.6422 | 0.8725 | 0.7059 | 0.5784 | 0.6261 | 0.6629 |
| Zscore_PCC_Relief_3_GP      | 0.7373 [0.6683-0.8063] | 0.0352 | 0.7158 | 0.5261 | 0.4417 | 0.7206 | 1.049  | 0.6961 | 0.7451 | 0.732  | 0.7103 |
| Zscore_PCC_Relief_3_NB      | 0.6077 [0.5305-0.6850] | 0.0394 | 0.5723 | 0.9552 | 0.1985 | 0.598  | 0.8431 | 0.6765 | 0.5196 | 0.5847 | 0.6163 |
| Zscore_PCC_Relief_4_SVM     | 0.7203 [0.6511-0.7894] | 0.0353 | 0.7137 | 0.5791 | 0.3554 | 0.6765 | 1.1176 | 0.6176 | 0.7353 | 0.7    | 0.6579 |
| Zscore_PCC_Relief_4_LDA     | 0.695 [0.6231-0.7669]  | 0.0367 | 0.6667 | 0.5626 | 0.3339 | 0.6667 | 1.0588 | 0.6373 | 0.6961 | 0.6771 | 0.6574 |
| Zscore_PCC_Relief_4_AE      | 0.6837 [0.6105-0.7569] | 0.0374 | 0.6254 | 0.4751 | 0.3106 | 0.652  | 0.7941 | 0.7549 | 0.549  | 0.626  | 0.6914 |
| Zscore_PCC_Relief_4_RF      | 0.7521 [0.6852-0.8190] | 0.0341 | 0.722  | 0.42   | 0.4368 | 0.7157 | 0.8431 | 0.7941 | 0.6373 | 0.6864 | 0.7558 |
| Zscore_PCC_Relief_4_LR      | 0.722 [0.6531-0.7909]  | 0.0352 | 0.7177 | 0.623  | 0.3492 | 0.6716 | 1.1863 | 0.5784 | 0.7647 | 0.7108 | 0.6446 |
| Zscore_PCC_Relief_4_LRLasso | 0.7297 [0.6615-0.7979] | 0.0348 | 0.7286 | 0.5898 | 0.3657 | 0.6814 | 1.1275 | 0.6176 | 0.7451 | 0.7079 | 0.6609 |
| Zscore_PCC_Relief_4_AB      | 0.7116 [0.6399-0.7834] | 0.0366 | 0.6646 | 0.5079 | 0.4126 | 0.701  | 1.2255 | 0.5882 | 0.8137 | 0.7595 | 0.664  |
| Zscore_PCC_Relief_4_DT      | 0.6176 [0.5506-0.6847] | 0.0342 | 0.7132 | 1      | 0.2353 | 0.6176 | 1      | 0.6176 | 0.6176 | 0.6176 | 0.6176 |
| Zscore_PCC_Relief_4_GP      | 0.7122 [0.6405-0.7839] | 0.0366 | 0.7217 | 0.5721 | 0.4383 | 0.7157 | 1.1765 | 0.6275 | 0.8039 | 0.7619 | 0.6833 |
| Zscore_PCC_Relief_4_NB      | 0.6149 [0.5379-0.6918] | 0.0393 | 0.5829 | 0.8768 | 0.2111 | 0.5882 | 0.451  | 0.8627 | 0.3137 | 0.557  | 0.6957 |
| Zscore_PCC_Relief_5_SVM     | 0.7585 [0.6935-0.8235] | 0.0332 | 0.7473 | 0.4408 | 0.3971 | 0.6961 | 0.8431 | 0.7745 | 0.6176 | 0.6695 | 0.7326 |
| Zscore_PCC_Relief_5_LDA     | 0.7203 [0.6507-0.7899] | 0.0355 | 0.6785 | 0.6045 | 0.3631 | 0.6765 | 1.2353 | 0.5588 | 0.7941 | 0.7308 | 0.6429 |
| Zscore_PCC_Relief_5_AE      | 0.6509 [0.5761-0.7257] | 0.0382 | 0.6763 | 0.5186 | 0.3018 | 0.6324 | 1.4804 | 0.3922 | 0.8725 | 0.7547 | 0.5894 |
| Zscore_PCC_Relief_5_RF      | 0.7667 [0.7015-0.8318] | 0.0332 | 0.7474 | 0.485  | 0.4511 | 0.7255 | 0.9804 | 0.7353 | 0.7157 | 0.7212 | 0.73   |
| Zscore_PCC_Relief_5_LR      | 0.7565 [0.6913-0.8218] | 0.0333 | 0.7361 | 0.4329 | 0.3772 | 0.6863 | 0.8431 | 0.7647 | 0.6078 | 0.661  | 0.7209 |
| Zscore_PCC_Relief_5_LRLasso | 0.7561 [0.6907-0.8214] | 0.0333 | 0.74   | 0.6211 | 0.3799 | 0.6863 | 1.1961 | 0.5882 | 0.7843 | 0.7317 | 0.6557 |
| Zscore_PCC_Relief_5_AB      | 0.7262 [0.6564-0.7960] | 0.0356 | 0.7011 | 0.5096 | 0.4146 | 0.701  | 1.2451 | 0.5784 | 0.8235 | 0.7662 | 0.6614 |
| Zscore_PCC_Relief_5_DT      | 0.6471 [0.5812-0.7129] | 0.0336 | 0.7334 | 1      | 0.2943 | 0.6471 | 1.0392 | 0.6275 | 0.6667 | 0.6531 | 0.6415 |
| Zscore_PCC_Relief_5_GP      | 0.7401 [0.6721-0.8081] | 0.0347 | 0.7394 | 0.5444 | 0.4541 | 0.7255 | 1.1176 | 0.6667 | 0.7843 | 0.7556 | 0.7018 |
| Zscore_PCC_Relief_5_NB      | 0.6115 [0.5344-0.6886] | 0.0394 | 0.5723 | 0.9592 | 0.2    | 0.5882 | 0.5294 | 0.8235 | 0.3529 | 0.56   | 0.6667 |
| Zscore_PCC_Relief_6_SVM     | 0.7921 [0.7303-0.8539] | 0.0315 | 0.7333 | 0.4457 | 0.4872 | 0.7402 | 0.8333 | 0.8235 | 0.6569 | 0.7059 | 0.7882 |
| Zscore_PCC_Relief_6_LDA     | 0.7657 [0.7007-0.8307] | 0.0332 | 0.7152 | 0.6007 | 0.4438 | 0.7157 | 1.2353 | 0.598  | 0.8333 | 0.7821 | 0.6746 |
| Zscore_PCC_Relief_6_AE      | 0.7156 [0.6460-0.7852] | 0.0355 | 0.7574 | 0.5343 | 0.3624 | 0.6667 | 1.3922 | 0.4706 | 0.8627 | 0.7742 | 0.6197 |
| Zscore_PCC_Relief_6_RF      | 0.7901 [0.7282-0.8519] | 0.0316 | 0.7708 | 0.435  | 0.4926 | 0.7451 | 0.902  | 0.7941 | 0.6961 | 0.7232 | 0.7717 |
| Zscore_PCC_Relief_6_LR      | 0.7911 [0.7300-0.8523] | 0.0312 | 0.7489 | 0.4252 | 0.4566 | 0.7255 | 0.8431 | 0.8039 | 0.6471 | 0.6949 | 0.7674 |
| Zscore_PCC_Relief_6_LRLasso | 0.7926 [0.7314-0.8538] | 0.0312 | 0.7497 | 0.3937 | 0.4867 | 0.7353 | 0.7451 | 0.8627 | 0.6078 | 0.6875 | 0.8158 |
| Zscore_PCC_Relief_6_AB      | 0.7424 [0.6735-0.8113] | 0.0352 | 0.6892 | 0.4952 | 0.4383 | 0.7157 | 0.8235 | 0.8039 | 0.6275 | 0.6833 | 0.7619 |
| Zscore_PCC_Relief_6_DT      | 0.6078 [0.5406-0.6750] | 0.0343 | 0.7019 | 1      | 0.2161 | 0.6078 | 1.0588 | 0.5784 | 0.6373 | 0.6146 | 0.6019 |
| Zscore_PCC_Relief_6_GP      | 0.7629 [0.6975-0.8283] | 0.0334 | 0.7629 | 0.5778 | 0.4619 | 0.7255 | 1.2157 | 0.6176 | 0.8333 | 0.7875 | 0.6855 |
| Zscore_PCC_Relief_6_NB      | 0.6138 [0.5366-0.6910] | 0.0394 | 0.5662 | 0.9662 | 0.2762 | 0.6225 | 0.5392 | 0.8529 | 0.3922 | 0.5839 | 0.7273 |
| Zscore_PCC_Relief_7_SVM     | 0.7918 [0.7291-0.8544] | 0.032  | 0.7245 | 0.4505 | 0.4926 | 0.7451 | 0.902  | 0.7941 | 0.6961 | 0.7232 | 0.7717 |
| Zscore_PCC_Relief_7_LDA     | 0.7306 [0.6595-0.8016] | 0.0363 | 0.668  | 0.5691 | 0.4823 | 0.7402 | 1.0882 | 0.6961 | 0.7843 | 0.7634 | 0.7207 |
| Zscore_PCC_Relief_7_AE      | 0.5986 [0.5211-0.6762] | 0.0396 | 0.5977 | 0.5998 | 0.1977 | 0.5882 | 1.451  | 0.3627 | 0.8137 | 0.6607 | 0.5608 |
| Zscore_PCC_Relief_7_RF      | 0.7837 [0.7205-0.8470] | 0.0323 | 0.7654 | 0.395  | 0.5044 | 0.7451 | 0.7647 | 0.8627 | 0.6275 | 0.6984 | 0.8205 |
| Zscore_PCC_Relief_7_LR      | 0.7804 [0.7171-0.8436] | 0.0323 | 0.7329 | 0.5088 | 0.4706 | 0.7353 | 1      | 0.7353 | 0.7353 | 0.7353 | 0.7353 |
| Zscore_PCC_Relief_7_LRLasso | 0.7863 [0.7237-0.8490] | 0.032  | 0.7314 | 0.5357 | 0.4714 | 0.7353 | 1.0588 | 0.7059 | 0.7647 | 0.75   | 0.7222 |
| Zscore_PCC_Relief_7_AB      | 0.7454 [0.6770-0.8138] | 0.0349 | 0.6933 | 0.508  | 0.4368 | 0.7157 | 1.1569 | 0.6373 | 0.7941 | 0.7558 | 0.6864 |
| Zscore_PCC_Relief_7_DT      | 0.6471 [0.5812-0.7129] | 0.0336 | 0.7334 | 1      | 0.2943 | 0.6471 | 1.0392 | 0.6275 | 0.6667 | 0.6531 | 0.6415 |
| Zscore_PCC_Relief_7_GP      | 0.7739 [0.7086-0.8392] | 0.0333 | 0.7496 | 0.5083 | 0.4806 | 0.7402 | 1.0294 | 0.7255 | 0.7549 | 0.7475 | 0.7333 |
| Zscore_PCC_Relief_7_NB      | 0.6148 [0.5376-0.6919] | 0.0393 | 0.5659 | 0.9844 | 0.2345 | 0.6078 | 0.6078 | 0.8039 | 0.4118 | 0.5775 | 0.6774 |
| Zscore_PCC_Relief_8_SVM     | 0.8032 [0.7421-0.8644] | 0.0312 | 0.7353 | 0.424  | 0.5345 | 0.7647 | 0.8627 | 0.8333 | 0.6961 | 0.7328 | 0.8068 |
| Zscore_PCC_Relief_8_LDA     | 0.7575 [0.6901-0.8249] | 0.0344 | 0.7    | 0.5414 | 0.4613 | 0.7304 | 1.049  | 0.7059 | 0.7549 | 0.7423 | 0.7196 |
| Zscore_PCC_Relief_8_AE      | 0.4936 [0.4137-0.5734] | 0.0407 | 0.4734 | 0.5354 | 0.0624 | 0.5294 | 1.3333 | 0.3627 | 0.6961 | 0.5441 | 0.5221 |
| Zscore_PCC_Relief_8_RF      | 0.794 [0.7324-0.8557]  | 0.0315 | 0.7667 | 0.455  | 0.5239 | 0.7598 | 0.8725 | 0.8235 | 0.6961 | 0.7304 | 0.7978 |
| Zscore_PCC_Relief_8_LR      | 0.7902 [0.7283-0.8521] | 0.0316 | 0.739  | 0.601  | 0.4819 | 0.7353 | 1.2157 | 0.6275 | 0.8431 | 0.8    | 0.6935 |
| Zscore_PCC_Relief_8_LRLasso | 0.7947 [0.7329-0.8565] | 0.0315 | 0.7397 | 0.4655 | 0.481  | 0.7402 | 0.951  | 0.7647 | 0.7157 | 0.729  | 0.7526 |
| Zscore_PCC_Relief_8_AB      | 0.7441 [0.6774-0.8109] | 0.034  | 0.7259 | 0.4945 | 0.3761 | 0.6863 | 0.8627 | 0.7549 | 0.6176 | 0.6638 | 0.7159 |
| Zscore_PCC_Relief_8_DT      | 0.6225 [0.5565-0.6886] | 0.0337 | 0.7091 | 1      | 0.2478 | 0.6225 | 1.1471 | 0.549  | 0.6961 | 0.6437 | 0.6068 |
| Zscore_PCC_Relief_8_GP      | 0.7823 [0.7180-0.8466] | 0.0328 | 0.755  | 0.5028 | 0.5107 | 0.7549 | 1.0588 | 0.7255 | 0.7843 | 0.7708 | 0.7407 |
| Zscore_PCC_Relief_8_NB      | 0.6175 [0.5403-0.6946] | 0.0394 | 0.5635 | 0.9954 | 0.2352 | 0.6127 | 0.7157 | 0.7549 | 0.4706 | 0.5878 | 0.6575 |
| Zscore_PCC_Relief_9_SVM     | 0.7921 [0.7292-0.8550] | 0.0321 | 0.7117 | 0.428  | 0.5041 | 0.75   | 0.8725 | 0.8137 | 0.6863 | 0.7217 | 0.7865 |
| Zscore_PCC_Relief_9_LDA     | 0.7334 [0.6642-0.8026] | 0.0353 | 0.669  | 0.471  | 0.3928 | 0.6961 | 0.9412 | 0.7255 | 0.6667 | 0.6852 | 0.7083 |
| Zscore_PCC_Relief_9_AE      | 0.64 [0.5646-0.7154]   | 0.0385 | 0.6387 | 0.4974 | 0.2471 | 0.6225 | 0.8725 | 0.6863 | 0.5588 | 0.6087 | 0.6404 |
| Zscore_PCC_Relief_9_RF      | 0.7704 [0.7055-0.8354] | 0.0331 | 0.7454 | 0.545  | 0.471  | 0.7353 | 1.0392 | 0.7157 | 0.7549 | 0.7449 | 0.7264 |
| Zscore_PCC_Relief_9_LR      | 0.775 [0.7108-0.8392]  | 0.0328 | 0.7106 | 0.48   | 0.4511 | 0.7255 | 0.9804 | 0.7353 | 0.7157 | 0.7212 | 0.73   |
| Zscore_PCC_Relief_9_LRLasso | 0.7787 [0.7146-0.8429] | 0.0327 | 0.711  | 0.4125 | 0.4765 | 0.7353 | 0.8431 | 0.8137 | 0.6569 | 0.7034 | 0.7791 |
| Zscore_PCC_Relief_9_AB      | 0.7373 [0.6687-0.8059] | 0.035  | 0.6647 | 0.4934 | 0.3892 | 0.6912 | 0.8137 | 0.7843 | 0.598  | 0.6612 | 0.7349 |
| Zscore_PCC_Relief_9_DT      | 0.652 [0.5867-0.7172]  | 0.0333 | 0.7347 | 1      | 0.3057 | 0.652  | 1.1078 | 0.598  | 0.7059 | 0.6703 | 0.6372 |

|                              |                        |        |        |        |        |        |        |        |        |        |        |
|------------------------------|------------------------|--------|--------|--------|--------|--------|--------|--------|--------|--------|--------|
| Zscore_PCC_Relief_9_GP       | 0.7637 [0.6980-0.8295] | 0.0335 | 0.7459 | 0.5259 | 0.4832 | 0.7402 | 1.1078 | 0.6863 | 0.7941 | 0.7692 | 0.7168 |
| Zscore_PCC_Relief_9_NB       | 0.594 [0.5154-0.6727]  | 0.0401 | 0.534  | 0.9964 | 0.2535 | 0.6176 | 0.6275 | 0.8039 | 0.4314 | 0.5857 | 0.6875 |
| Zscore_PCC_Relief_10_SVM     | 0.7982 [0.7352-0.8611] | 0.0321 | 0.7086 | 0.4564 | 0.5208 | 0.7598 | 0.9314 | 0.7941 | 0.7255 | 0.7431 | 0.7789 |
| Zscore_PCC_Relief_10_LDA     | 0.7421 [0.6730-0.8113] | 0.0353 | 0.6642 | 0.5424 | 0.4221 | 0.7108 | 1.049  | 0.6863 | 0.7353 | 0.7216 | 0.7009 |
| Zscore_PCC_Relief_10_AE      | 0.6469 [0.5717-0.7220] | 0.0383 | 0.6178 | 0.5607 | 0.27   | 0.6176 | 1.4902 | 0.3725 | 0.8627 | 0.7308 | 0.5789 |
| Zscore_PCC_Relief_10_RF      | 0.7913 [0.7294-0.8532] | 0.0316 | 0.7655 | 0.46   | 0.4926 | 0.7451 | 0.902  | 0.7941 | 0.6961 | 0.7232 | 0.7717 |
| Zscore_PCC_Relief_10_LR      | 0.7802 [0.7163-0.8441] | 0.0326 | 0.7123 | 0.4582 | 0.491  | 0.7451 | 0.9412 | 0.7745 | 0.7157 | 0.7315 | 0.7604 |
| Zscore_PCC_Relief_10_LRLasso | 0.7918 [0.7294-0.8542] | 0.0319 | 0.7206 | 0.5917 | 0.4739 | 0.7353 | 1.1176 | 0.6765 | 0.7941 | 0.7667 | 0.7105 |
| Zscore_PCC_Relief_10_AB      | 0.7582 [0.6905-0.8259] | 0.0345 | 0.6684 | 0.4913 | 0.4857 | 0.7402 | 0.8529 | 0.8137 | 0.6667 | 0.7094 | 0.7816 |
| Zscore_PCC_Relief_10_DT      | 0.6618 [0.5971-0.7264] | 0.033  | 0.7422 | 1      | 0.3262 | 0.6618 | 1.1275 | 0.598  | 0.7255 | 0.6854 | 0.6435 |
| Zscore_PCC_Relief_10_GP      | 0.7738 [0.7091-0.8386] | 0.033  | 0.7464 | 0.5046 | 0.481  | 0.7402 | 1.049  | 0.7157 | 0.7647 | 0.7526 | 0.729  |
| Zscore_PCC_Relief_10_NB      | 0.5852 [0.5067-0.6636] | 0.04   | 0.5428 | 0.9977 | 0.1804 | 0.5833 | 0.6176 | 0.7745 | 0.3922 | 0.5603 | 0.6349 |
| Zscore_PCC_Relief_11_SVM     | 0.7906 [0.7264-0.8547] | 0.0327 | 0.6982 | 0.4209 | 0.5179 | 0.7549 | 0.8235 | 0.8431 | 0.6667 | 0.7167 | 0.8095 |
| Zscore_PCC_Relief_11_LDA     | 0.7259 [0.6546-0.7972] | 0.0364 | 0.635  | 0.5601 | 0.4125 | 0.7059 | 1.0588 | 0.6765 | 0.7353 | 0.7188 | 0.6944 |
| Zscore_PCC_Relief_11_AE      | 0.6817 [0.6092-0.7541] | 0.0369 | 0.6832 | 0.5859 | 0.2747 | 0.6373 | 1.0392 | 0.6176 | 0.6569 | 0.6429 | 0.6321 |
| Zscore_PCC_Relief_11_RF      | 0.8069 [0.7465-0.8673] | 0.0308 | 0.7696 | 0.435  | 0.5424 | 0.7696 | 0.8922 | 0.8235 | 0.7157 | 0.7434 | 0.8022 |
| Zscore_PCC_Relief_11_LR      | 0.7731 [0.7080-0.8381] | 0.0332 | 0.699  | 0.4101 | 0.4889 | 0.7402 | 0.8137 | 0.8333 | 0.6471 | 0.7025 | 0.7952 |
| Zscore_PCC_Relief_11_LRLasso | 0.7906 [0.7280-0.8531] | 0.0319 | 0.7165 | 0.3929 | 0.4999 | 0.7451 | 0.8039 | 0.8431 | 0.6471 | 0.7049 | 0.8049 |
| Zscore_PCC_Relief_11_AB      | 0.7574 [0.6905-0.8243] | 0.0341 | 0.7068 | 0.5003 | 0.4412 | 0.7206 | 1.0098 | 0.7157 | 0.7255 | 0.7228 | 0.7184 |
| Zscore_PCC_Relief_11_DT      | 0.6716 [0.6072-0.7359] | 0.0328 | 0.7506 | 1      | 0.3452 | 0.6716 | 1.1078 | 0.6176 | 0.7255 | 0.6923 | 0.6549 |
| Zscore_PCC_Relief_11_GP      | 0.7762 [0.7110-0.8415] | 0.0333 | 0.7283 | 0.5192 | 0.5147 | 0.7549 | 1.1373 | 0.6863 | 0.8235 | 0.7955 | 0.7241 |
| Zscore_PCC_Relief_11_NB      | 0.5641 [0.4846-0.6436] | 0.0406 | 0.5186 | 0.9989 | 0.2192 | 0.6029 | 0.6569 | 0.7745 | 0.4314 | 0.5766 | 0.6567 |
| Zscore_PCC_Relief_12_SVM     | 0.7711 [0.7049-0.8374] | 0.0338 | 0.6835 | 0.446  | 0.4751 | 0.7353 | 0.8627 | 0.8039 | 0.6667 | 0.7069 | 0.7727 |
| Zscore_PCC_Relief_12_LDA     | 0.718 [0.6460-0.7900]  | 0.0367 | 0.6309 | 0.517  | 0.4232 | 0.7108 | 0.9118 | 0.7549 | 0.6667 | 0.6937 | 0.7312 |
| Zscore_PCC_Relief_12_AE      | 0.6745 [0.6007-0.7482] | 0.0377 | 0.6323 | 0.573  | 0.3509 | 0.652  | 1.5    | 0.402  | 0.902  | 0.8039 | 0.6013 |
| Zscore_PCC_Relief_12_RF      | 0.8031 [0.7422-0.8640] | 0.0311 | 0.7662 | 0.375  | 0.5334 | 0.7549 | 0.7059 | 0.902  | 0.6078 | 0.697  | 0.8611 |
| Zscore_PCC_Relief_12_LR      | 0.7643 [0.6983-0.8304] | 0.0337 | 0.6904 | 0.4274 | 0.4673 | 0.7304 | 0.8333 | 0.8137 | 0.6471 | 0.6975 | 0.7765 |
| Zscore_PCC_Relief_12_LRLasso | 0.7773 [0.7130-0.8416] | 0.0328 | 0.705  | 0.481  | 0.4511 | 0.7255 | 0.9804 | 0.7353 | 0.7157 | 0.7212 | 0.73   |
| Zscore_PCC_Relief_12_AB      | 0.7543 [0.6867-0.8220] | 0.0345 | 0.6943 | 0.5064 | 0.4422 | 0.7206 | 1.0686 | 0.6863 | 0.7549 | 0.7368 | 0.7064 |
| Zscore_PCC_Relief_12_DT      | 0.6667 [0.6018-0.7315] | 0.0331 | 0.7479 | 1      | 0.3339 | 0.6667 | 1.0588 | 0.6373 | 0.6961 | 0.6771 | 0.6574 |
| Zscore_PCC_Relief_12_GP      | 0.7815 [0.7177-0.8453] | 0.0326 | 0.7325 | 0.5112 | 0.472  | 0.7353 | 1.0784 | 0.6961 | 0.7745 | 0.7553 | 0.7182 |
| Zscore_PCC_Relief_12_NB      | 0.5604 [0.4808-0.6399] | 0.0406 | 0.5178 | 0.9985 | 0.182  | 0.5833 | 0.598  | 0.7843 | 0.3824 | 0.5594 | 0.6393 |
| Zscore_PCC_Relief_13_SVM     | 0.7675 [0.7012-0.8338] | 0.0338 | 0.6845 | 0.4751 | 0.472  | 0.7353 | 0.9216 | 0.7745 | 0.6961 | 0.7182 | 0.7553 |
| Zscore_PCC_Relief_13_LDA     | 0.7321 [0.6615-0.8028] | 0.036  | 0.6417 | 0.45   | 0.4429 | 0.7206 | 0.9118 | 0.7647 | 0.6765 | 0.7027 | 0.7419 |
| Zscore_PCC_Relief_13_AE      | 0.7035 [0.6320-0.7749] | 0.0364 | 0.6498 | 0.4942 | 0.3563 | 0.6765 | 0.8627 | 0.7451 | 0.6078 | 0.6552 | 0.7045 |
| Zscore_PCC_Relief_13_RF      | 0.7972 [0.7360-0.8585] | 0.0312 | 0.7678 | 0.355  | 0.5491 | 0.7598 | 0.6765 | 0.9216 | 0.598  | 0.6963 | 0.8841 |
| Zscore_PCC_Relief_13_LR      | 0.7629 [0.6965-0.8293] | 0.0339 | 0.6859 | 0.4191 | 0.4872 | 0.7402 | 0.8333 | 0.8235 | 0.6569 | 0.7059 | 0.7882 |
| Zscore_PCC_Relief_13_LRLasso | 0.7716 [0.7064-0.8369] | 0.0333 | 0.6931 | 0.4646 | 0.481  | 0.7402 | 0.951  | 0.7647 | 0.7157 | 0.729  | 0.7526 |
| Zscore_PCC_Relief_13_AB      | 0.7848 [0.7205-0.8491] | 0.0328 | 0.7017 | 0.4839 | 0.5284 | 0.75   | 0.6765 | 0.9118 | 0.5882 | 0.6889 | 0.8696 |
| Zscore_PCC_Relief_13_DT      | 0.6667 [0.6017-0.7317] | 0.0332 | 0.7492 | 1      | 0.3334 | 0.6667 | 1.0196 | 0.6569 | 0.6765 | 0.67   | 0.6635 |
| Zscore_PCC_Relief_13_GP      | 0.787 [0.7240-0.8500]  | 0.0321 | 0.75   | 0.5103 | 0.5029 | 0.75   | 1.1078 | 0.6961 | 0.8039 | 0.7802 | 0.7257 |
| Zscore_PCC_Relief_13_NB      | 0.5548 [0.4752-0.6344] | 0.0406 | 0.5199 | 0.9957 | 0.2182 | 0.5882 | 0.4118 | 0.8824 | 0.2941 | 0.5556 | 0.7143 |
| Zscore_PCC_Relief_14_SVM     | 0.7714 [0.7055-0.8373] | 0.0336 | 0.6862 | 0.4328 | 0.4658 | 0.7304 | 0.8529 | 0.8039 | 0.6569 | 0.7009 | 0.7701 |
| Zscore_PCC_Relief_14_LDA     | 0.7516 [0.6833-0.8199] | 0.0349 | 0.6605 | 0.4196 | 0.4553 | 0.7255 | 0.8627 | 0.7941 | 0.6569 | 0.6983 | 0.7614 |
| Zscore_PCC_Relief_14_AE      | 0.6626 [0.5879-0.7374] | 0.0381 | 0.6085 | 0.6349 | 0.2946 | 0.6471 | 1.0588 | 0.6176 | 0.6765 | 0.6562 | 0.6389 |
| Zscore_PCC_Relief_14_RF      | 0.8108 [0.7519-0.8697] | 0.0301 | 0.7886 | 0.495  | 0.5102 | 0.7549 | 0.9608 | 0.7745 | 0.7353 | 0.7453 | 0.7653 |
| Zscore_PCC_Relief_14_LR      | 0.7646 [0.6983-0.8309] | 0.0338 | 0.6879 | 0.481  | 0.4518 | 0.7255 | 0.9412 | 0.7549 | 0.6961 | 0.713  | 0.7396 |
| Zscore_PCC_Relief_14_LRLasso | 0.776 [0.7112-0.8407]  | 0.033  | 0.6995 | 0.4888 | 0.4906 | 0.7451 | 0.9608 | 0.7647 | 0.7255 | 0.7358 | 0.7551 |
| Zscore_PCC_Relief_14_AB      | 0.7721 [0.7064-0.8378] | 0.0335 | 0.6832 | 0.5047 | 0.4626 | 0.7304 | 1.0882 | 0.6863 | 0.7745 | 0.7527 | 0.7117 |
| Zscore_PCC_Relief_14_DT      | 0.6863 [0.6225-0.7500] | 0.0325 | 0.7628 | 1      | 0.3737 | 0.6863 | 1.0784 | 0.6471 | 0.7255 | 0.7021 | 0.6727 |
| Zscore_PCC_Relief_14_GP      | 0.7912 [0.7297-0.8528] | 0.0314 | 0.7678 | 0.5069 | 0.4936 | 0.7451 | 1.1176 | 0.6863 | 0.8039 | 0.7778 | 0.7193 |
| Zscore_PCC_Relief_14_NB      | 0.5662 [0.4871-0.6453] | 0.0404 | 0.5586 | 0.9936 | 0.2222 | 0.5882 | 0.3922 | 0.8922 | 0.2843 | 0.5549 | 0.725  |
| Zscore_PCC_Relief_15_SVM     | 0.7776 [0.7123-0.8430] | 0.0334 | 0.6937 | 0.4505 | 0.4739 | 0.7353 | 0.8824 | 0.7941 | 0.6765 | 0.7105 | 0.7667 |
| Zscore_PCC_Relief_15_LDA     | 0.7713 [0.7046-0.8381] | 0.034  | 0.6785 | 0.5289 | 0.471  | 0.7353 | 1.0392 | 0.7157 | 0.7549 | 0.7449 | 0.7264 |
| Zscore_PCC_Relief_15_AE      | 0.5685 [0.4892-0.6479] | 0.0405 | 0.5151 | 0.5399 | 0.1479 | 0.5735 | 0.8922 | 0.6275 | 0.5196 | 0.5664 | 0.5824 |
| Zscore_PCC_Relief_15_RF      | 0.8105 [0.7514-0.8696] | 0.0301 | 0.7888 | 0.43   | 0.5162 | 0.7549 | 0.8431 | 0.8333 | 0.6765 | 0.7203 | 0.8023 |
| Zscore_PCC_Relief_15_LR      | 0.7626 [0.6960-0.8292] | 0.034  | 0.6871 | 0.4056 | 0.4799 | 0.7353 | 0.8039 | 0.8333 | 0.6373 | 0.6967 | 0.7927 |
| Zscore_PCC_Relief_15_LRLasso | 0.7811 [0.7166-0.8456] | 0.0329 | 0.7017 | 0.4435 | 0.5029 | 0.75   | 0.8922 | 0.8039 | 0.6961 | 0.7257 | 0.7802 |
| Zscore_PCC_Relief_15_AB      | 0.7479 [0.6806-0.8152] | 0.0343 | 0.7108 | 0.509  | 0.4368 | 0.7157 | 1.1569 | 0.6373 | 0.7941 | 0.7558 | 0.6864 |
| Zscore_PCC_Relief_15_DT      | 0.6471 [0.5812-0.7129] | 0.0336 | 0.7363 | 1      | 0.2942 | 0.6471 | 0.9804 | 0.6569 | 0.6373 | 0.6442 | 0.65   |
| Zscore_PCC_Relief_15_GP      | 0.7822 [0.7188-0.8455] | 0.0323 | 0.7626 | 0.5158 | 0.4963 | 0.7451 | 1.1569 | 0.6667 | 0.8235 | 0.7907 | 0.7119 |
| Zscore_PCC_Relief_15_NB      | 0.5574 [0.4780-0.6367] | 0.0405 | 0.5208 | 0.9939 | 0.2119 | 0.5833 | 0.3824 | 0.8922 | 0.2745 | 0.5515 | 0.7179 |
| Zscore_PCC_Relief_16_SVM     | 0.7593 [0.6918-0.8268] | 0.0344 | 0.6888 | 0.4944 | 0.4714 | 0.7353 | 0.9412 | 0.7647 | 0.7059 | 0.7222 | 0.75   |
| Zscore_PCC_Relief_16_LDA     | 0.7453 [0.6757-0.8149] | 0.0355 | 0.6542 | 0.5323 | 0.4608 | 0.7304 | 0.9902 | 0.7353 | 0.7255 | 0.7282 | 0.7327 |
| Zscore_PCC_Relief_16_AE      | 0.6474 [0.5721-0.7228] | 0.0384 | 0.6185 | 0.5033 | 0.2553 | 0.6275 | 1.0588 | 0.598  | 0.6569 | 0.6354 | 0.6204 |
| Zscore_PCC_Relief_16_RF      | 0.8084 [0.7488-0.8680] | 0.0304 | 0.7913 | 0.465  | 0.5239 | 0.7598 | 0.8725 | 0.8235 | 0.6961 | 0.7304 | 0.7978 |
| Zscore_PCC_Relief_16_LR      | 0.7654 [0.6988-0.8319] | 0.0339 | 0.6932 | 0.4347 | 0.4751 | 0.7353 | 0.8627 | 0.8039 | 0.6667 | 0.7069 | 0.7727 |
| Zscore_PCC_Relief_16_LRLasso | 0.7782 [0.7131-0.8432] | 0.0332 | 0.7027 | 0.4732 | 0.4815 | 0.7402 | 0.9314 | 0.7745 | 0.7059 | 0.7248 | 0.7579 |
| Zscore_PCC_Relief_16_AB      | 0.789 [0.7270-0.8511]  | 0.0317 | 0.7439 | 0.4913 | 0.4765 | 0.7353 | 0.8431 | 0.8137 | 0.6569 | 0.7034 | 0.7791 |

|                              |                        |        |        |        |        |        |        |        |        |        |        |
|------------------------------|------------------------|--------|--------|--------|--------|--------|--------|--------|--------|--------|--------|
| Zscore_PCC_Relief_16_DT      | 0.6716 [0.6068-0.7363] | 0.033  | 0.7541 | 1      | 0.3432 | 0.6716 | 0.9902 | 0.6765 | 0.6667 | 0.6699 | 0.6733 |
| Zscore_PCC_Relief_16_GP      | 0.793 [0.7311-0.8549]  | 0.0316 | 0.7672 | 0.5069 | 0.5413 | 0.7696 | 1.0882 | 0.7255 | 0.8137 | 0.7957 | 0.7477 |
| Zscore_PCC_Relief_16_NB      | 0.5489 [0.4694-0.6284] | 0.0406 | 0.5111 | 0.9976 | 0.1773 | 0.5735 | 0.4412 | 0.8529 | 0.2941 | 0.5472 | 0.6667 |
| Zscore_PCC_Relief_17_SVM     | 0.7667 [0.7002-0.8333] | 0.0339 | 0.7047 | 0.4703 | 0.4917 | 0.7451 | 0.9216 | 0.7843 | 0.7059 | 0.7273 | 0.766  |
| Zscore_PCC_Relief_17_LDA     | 0.7477 [0.6785-0.8169] | 0.0353 | 0.658  | 0.5296 | 0.461  | 0.7304 | 0.9706 | 0.7451 | 0.7157 | 0.7238 | 0.7374 |
| Zscore_PCC_Relief_17_AE      | 0.7072 [0.6360-0.7784] | 0.0363 | 0.6567 | 0.5258 | 0.3492 | 0.6716 | 0.8137 | 0.7647 | 0.5784 | 0.6446 | 0.7108 |
| Zscore_PCC_Relief_17_RF      | 0.8077 [0.7482-0.8671] | 0.0303 | 0.782  | 0.415  | 0.5199 | 0.7549 | 0.8039 | 0.8529 | 0.6569 | 0.7131 | 0.8171 |
| Zscore_PCC_Relief_17_LR      | 0.7645 [0.6980-0.8310] | 0.0339 | 0.7032 | 0.4122 | 0.4999 | 0.7451 | 0.8039 | 0.8431 | 0.6471 | 0.7049 | 0.8049 |
| Zscore_PCC_Relief_17_LRLasso | 0.7769 [0.7117-0.8421] | 0.0333 | 0.704  | 0.3961 | 0.4949 | 0.7451 | 0.8627 | 0.8137 | 0.6765 | 0.7155 | 0.7841 |
| Zscore_PCC_Relief_17_AB      | 0.7664 [0.7015-0.8314] | 0.0331 | 0.7131 | 0.4949 | 0.446  | 0.7206 | 0.8529 | 0.7941 | 0.6471 | 0.6923 | 0.7586 |
| Zscore_PCC_Relief_17_DT      | 0.7059 [0.6431-0.7687] | 0.0321 | 0.779  | 1      | 0.4118 | 0.7059 | 1.0196 | 0.6961 | 0.7157 | 0.71   | 0.7019 |
| Zscore_PCC_Relief_17_GP      | 0.7945 [0.7327-0.8562] | 0.0315 | 0.7713 | 0.5008 | 0.5298 | 0.7647 | 1.0392 | 0.7451 | 0.7843 | 0.7755 | 0.7547 |
| Zscore_PCC_Relief_17_NB      | 0.5524 [0.4730-0.6318] | 0.0405 | 0.5306 | 0.9997 | 0.1849 | 0.5784 | 0.4706 | 0.8431 | 0.3137 | 0.5513 | 0.6667 |
| Zscore_PCC_Relief_18_SVM     | 0.7644 [0.6975-0.8313] | 0.0341 | 0.6993 | 0.5313 | 0.472  | 0.7353 | 1.0784 | 0.6961 | 0.7745 | 0.7553 | 0.7182 |
| Zscore_PCC_Relief_18_LDA     | 0.7442 [0.6744-0.8141] | 0.0356 | 0.654  | 0.3912 | 0.4635 | 0.7304 | 0.8922 | 0.7843 | 0.6765 | 0.708  | 0.7582 |
| Zscore_PCC_Relief_18_AE      | 0.595 [0.5172-0.6727]  | 0.0397 | 0.5671 | 0.4757 | 0.1838 | 0.5833 | 0.5784 | 0.7941 | 0.3725 | 0.5586 | 0.6441 |
| Zscore_PCC_Relief_18_RF      | 0.8026 [0.7420-0.8633] | 0.031  | 0.7754 | 0.45   | 0.5134 | 0.7549 | 0.8824 | 0.8137 | 0.6961 | 0.7281 | 0.7889 |
| Zscore_PCC_Relief_18_LR      | 0.7671 [0.7010-0.8332] | 0.0337 | 0.706  | 0.4334 | 0.4843 | 0.7402 | 0.8725 | 0.8039 | 0.6765 | 0.713  | 0.7753 |
| Zscore_PCC_Relief_18_LRLasso | 0.7818 [0.7171-0.8465] | 0.033  | 0.7083 | 0.612  | 0.4949 | 0.7451 | 1.1373 | 0.6765 | 0.8137 | 0.7841 | 0.7155 |
| Zscore_PCC_Relief_18_AB      | 0.766 [0.7012-0.8307]  | 0.0331 | 0.7071 | 0.496  | 0.4029 | 0.701  | 0.9314 | 0.7353 | 0.6667 | 0.6881 | 0.7158 |
| Zscore_PCC_Relief_18_DT      | 0.7059 [0.6430-0.7687] | 0.0321 | 0.7794 | 1      | 0.4118 | 0.7059 | 1      | 0.7059 | 0.7059 | 0.7059 | 0.7059 |
| Zscore_PCC_Relief_18_GP      | 0.7858 [0.7225-0.8490] | 0.0323 | 0.7604 | 0.5024 | 0.5295 | 0.7647 | 1.0196 | 0.7549 | 0.7745 | 0.77   | 0.7596 |
| Zscore_PCC_Relief_18_NB      | 0.5597 [0.4806-0.6388] | 0.0404 | 0.5446 | 0.9997 | 0.1746 | 0.5735 | 0.4608 | 0.8431 | 0.3039 | 0.5478 | 0.6596 |
| Zscore_PCC_Relief_19_SVM     | 0.7665 [0.7006-0.8324] | 0.0336 | 0.7057 | 0.5221 | 0.471  | 0.7353 | 1.0392 | 0.7157 | 0.7549 | 0.7449 | 0.7264 |
| Zscore_PCC_Relief_19_LDA     | 0.7492 [0.6800-0.8184] | 0.0353 | 0.6571 | 0.4251 | 0.4532 | 0.7255 | 0.902  | 0.7745 | 0.6765 | 0.7054 | 0.75   |
| Zscore_PCC_Relief_19_AE      | 0.5797 [0.5009-0.6585] | 0.0402 | 0.5383 | 0.4623 | 0.1685 | 0.5833 | 0.8529 | 0.6569 | 0.5098 | 0.5726 | 0.5977 |
| Zscore_PCC_Relief_19_RF      | 0.8106 [0.7515-0.8698] | 0.0302 | 0.7872 | 0.38   | 0.542  | 0.7598 | 0.7157 | 0.902  | 0.6176 | 0.7023 | 0.863  |
| Zscore_PCC_Relief_19_LR      | 0.7743 [0.7093-0.8393] | 0.0332 | 0.7149 | 0.4184 | 0.4963 | 0.7451 | 0.8431 | 0.8235 | 0.6667 | 0.7119 | 0.7907 |
| Zscore_PCC_Relief_19_LRLasso | 0.7783 [0.7136-0.8429] | 0.033  | 0.7075 | 0.5332 | 0.471  | 0.7353 | 1.0392 | 0.7157 | 0.7549 | 0.7449 | 0.7264 |
| Zscore_PCC_Relief_19_AB      | 0.7842 [0.7215-0.8469] | 0.032  | 0.7266 | 0.5101 | 0.4635 | 0.7304 | 1.1078 | 0.6765 | 0.7843 | 0.7582 | 0.708  |
| Zscore_PCC_Relief_19_DT      | 0.701 [0.6379-0.7641]  | 0.0322 | 0.7765 | 1      | 0.4021 | 0.701  | 0.9706 | 0.7157 | 0.6863 | 0.6952 | 0.7071 |
| Zscore_PCC_Relief_19_GP      | 0.7802 [0.7163-0.8441] | 0.0326 | 0.7507 | 0.5003 | 0.5099 | 0.7549 | 1.0196 | 0.7451 | 0.7647 | 0.76   | 0.75   |
| Zscore_PCC_Relief_19_NB      | 0.5563 [0.4771-0.6355] | 0.0404 | 0.5393 | 0.9998 | 0.1746 | 0.5735 | 0.4608 | 0.8431 | 0.3039 | 0.5478 | 0.6596 |
| Zscore_PCC_Relief_20_SVM     | 0.7606 [0.6934-0.8277] | 0.0343 | 0.6997 | 0.4644 | 0.4739 | 0.7353 | 0.8824 | 0.7941 | 0.6765 | 0.7105 | 0.7667 |
| Zscore_PCC_Relief_20_LDA     | 0.7466 [0.6766-0.8166] | 0.0357 | 0.6489 | 0.4081 | 0.4541 | 0.7255 | 0.8824 | 0.7843 | 0.6667 | 0.7018 | 0.7556 |
| Zscore_PCC_Relief_20_AE      | 0.6413 [0.5643-0.7183] | 0.0393 | 0.563  | 0.5128 | 0.3082 | 0.652  | 0.8333 | 0.7353 | 0.5686 | 0.6303 | 0.6824 |
| Zscore_PCC_Relief_20_RF      | 0.807 [0.7475-0.8664]  | 0.0303 | 0.7798 | 0.38   | 0.5157 | 0.75   | 0.7549 | 0.8725 | 0.6275 | 0.7008 | 0.8312 |
| Zscore_PCC_Relief_20_LR      | 0.7708 [0.7050-0.8365] | 0.0336 | 0.7143 | 0.4243 | 0.5029 | 0.75   | 0.8922 | 0.8039 | 0.6961 | 0.7257 | 0.7802 |
| Zscore_PCC_Relief_20_LRLasso | 0.7769 [0.7120-0.8418] | 0.0331 | 0.7066 | 0.5559 | 0.4714 | 0.7353 | 1.0588 | 0.7059 | 0.7647 | 0.75   | 0.7222 |
| Zscore_PCC_Relief_20_AB      | 0.7751 [0.7116-0.8385] | 0.0324 | 0.7276 | 0.506  | 0.4221 | 0.7108 | 1.049  | 0.6863 | 0.7353 | 0.7216 | 0.7009 |
| Zscore_PCC_Relief_20_DT      | 0.7059 [0.6430-0.7687] | 0.0321 | 0.7794 | 1      | 0.4118 | 0.7059 | 1      | 0.7059 | 0.7059 | 0.7059 | 0.7059 |
| Zscore_PCC_Relief_20_GP      | 0.7839 [0.7213-0.8466] | 0.032  | 0.7681 | 0.5089 | 0.4872 | 0.7402 | 1.1667 | 0.6569 | 0.8235 | 0.7882 | 0.7059 |
| Zscore_PCC_Relief_20_NB      | 0.5552 [0.4760-0.6343] | 0.0404 | 0.5439 | 0.9992 | 0.1729 | 0.5686 | 0.3922 | 0.8725 | 0.2647 | 0.5427 | 0.675  |
